# Supplementary material
Source: PubMed Central journal article supplement (PMC9259207)
Supplement: EMS144313-supplement-Supplementary_Material.pdf [file EMS144313-supplement-Supplementary_Material.pdf]

# Supplementary Material

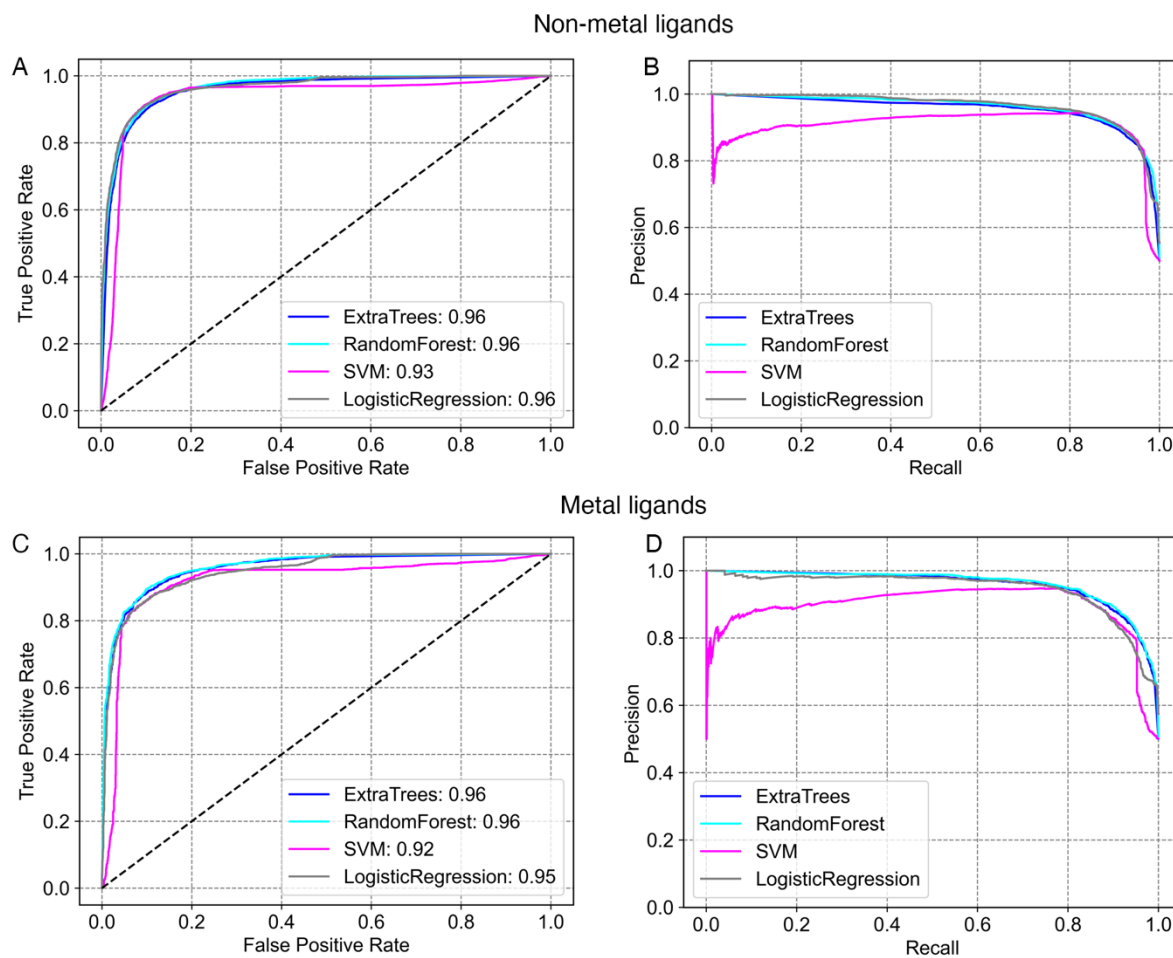

Supplementary Figure 1. Benchmarking of 3DLigandSite on the cross-validation training-testing data. Receiver operator characteristic (ROC) curve and Precision-Recall curve shown for the prediction of binding site of non-metal (A and B) and metal (C and D) binding sites.

**Supplementary Table 1. Features used in machine learning**

| <b>Feature</b>                      | <b>Value range</b>                                                           |
|-------------------------------------|------------------------------------------------------------------------------|
| js divergence score (conservation)  | 0-1                                                                          |
| <b><i>Amino acid properties</i></b> |                                                                              |
| Hydrophobicity                      | 0-1                                                                          |
| Polar uncharged                     | 0/1 (1 if polar uncharged, 0 otherwise)                                      |
| Isoelectric point                   | 0-1                                                                          |
| Aromatic                            | 0/1 (1 if aromatic, 0 otherwise)                                             |
| Van der Waals volume                | 0-1                                                                          |
| Positive                            | 0/1 (1 if positive, 0 otherwise)                                             |
| Negative                            | 0/1 (1 if negative, 0 otherwise)                                             |
| Amino acid                          | Each amino acid 1 if present, if not 0. I.e<br>Is tyrosine? 1, Is alanine? 0 |
| <b><i>3DLigandSite features</i></b> |                                                                              |
| Min ligand distance                 | 0-1 (Value/10, any value greater than 1 is scored as 1)                      |
| Max ligand distance                 | 0-1 (Value/10, any value greater than 1 is scored as 1)                      |
| Average ligand distance             | 0-1 (Value/10, any value greater than 1 is scored as 1)                      |
| Ligand Contacts                     | 0-1 (Percentage of ligands that the residue is within 0.8/0.4Å + VDW of/100) |

**Supplementary Table 3. Testing, training, and validation dataset sizes.** The training/test set was used for five-fold cross validation using an 80:20 split, with 80% of the data used for training and testing on the remaining 20%.

|                                | <b>Number of binding sites</b> | <b>Number of binding residues</b> | <b>Number of non-binding residues</b> |
|--------------------------------|--------------------------------|-----------------------------------|---------------------------------------|
| <b>Metal binding sites</b>     |                                |                                   |                                       |
| Train/test                     | 1600                           | 1976                              | 1976                                  |
| Validation                     | 2889                           | 16166                             | 825376                                |
|                                |                                |                                   |                                       |
| <b>Non-metal binding sites</b> |                                |                                   |                                       |
| Train/test                     | 1573                           | 6950                              | 6950                                  |
| Validation                     | 3527                           | 59203                             | 1044947                               |

**Supplementary Table 4. Benchmarking machine learning performance.** The performance of four classifiers on datasets are summarised here. ET = Extra-Trees, RF = Random Forest, SVM = Support Vector Machine, LogR = LogisticRegression. Results for **A) Non-metal ligands** and **B) Metal ligands**.

#### A. Non-metal ligands

| <i>Model</i> | Test      |        |       | Validation Seq-Search |        |      | Validation Struc-Search |        |      |
|--------------|-----------|--------|-------|-----------------------|--------|------|-------------------------|--------|------|
|              | Precision | Recall | AUC * | Precision             | Recall | AUC  | Precision               | Recall | AUC  |
| <i>ET</i>    | 0.9       | 0.9    | 0.96  | 0.85                  | 0.92   | 0.97 | 0.83                    | 0.89   | 0.92 |
| <i>RF</i>    | 0.9       | 0.9    | 0.96  | 0.86                  | 0.92   | 0.98 | 0.84                    | 0.89   | 0.93 |
| <i>SVM</i>   | 0.91      | 0.91   | 0.93  | 0.9                   | 0.93   | 0.94 | 0.87                    | 0.89   | 0.9  |
| <i>LogR</i>  | 0.91      | 0.91   | 0.95  | 0.91                  | 0.92   | 0.99 | 0.88                    | 0.89   | 0.95 |

\*Average from 5-Fold CV

#### B. Metal ligands

| <i>Model</i> | Test      |        |       | Validation |        |      | Validation Struc-Search |        |      |
|--------------|-----------|--------|-------|------------|--------|------|-------------------------|--------|------|
|              | Precision | Recall | AUC * | Precision  | Recall | AUC  | Precision               | Recall | AUC  |
| <i>ET</i>    | 0.89      | 0.89   | 0.96  | 0.71       | 0.89   | 0.96 | 0.71                    | 0.78   | 0.84 |
| <i>RF</i>    | 0.9       | 0.9    | 0.96  | 0.71       | 0.89   | 0.96 | 0.72                    | 0.78   | 0.85 |
| <i>SVM</i>   | 0.88      | 0.88   | 0.92  | 0.79       | 0.89   | 0.91 | 0.73                    | 0.78   | 0.7  |
| <i>LogR</i>  | 0.88      | 0.88   | 0.95  | 0.79       | 0.89   | 0.98 | 0.73                    | 0.78   | 0.9  |

\*Average from 5-Fold CV

**Supplementary Table 5. CASP Assessment.** The performance of the sequence-based and structure-based 3dligandsite tool on the CASP dataset.

| Sequence-based         | MCC  | Precision | Recall | Targets |
|------------------------|------|-----------|--------|---------|
| HHSearch Prob 75%      | 0.73 | 0.65      | 0.85   | 70      |
| <b>Structure Based</b> |      |           |        |         |
| TMScore 0.5            | 0.65 | 0.62      | 0.71   | 70      |
| TMScore 0.6            | 0.72 | 0.67      | 0.8    | 70      |
| TMScore 0.7            | 0.71 | 0.68      | 0.77   | 70      |
| TMScore 0.8            | 0.69 | 0.65      | 0.77   | 70      |
