# Supplementary material
Source: PubMed Central journal article supplement (PMC9259207)
Supplement: EMS144313-supplement-Supplementary_Table_2.pdf [file EMS144313-supplement-Supplementary_Table_2.pdf]

Supplementary Table 2. List of all Protein Databank identifiers used with protein chain included

11as\_A  
11as\_B  
155c\_A  
1a0i\_A  
1a0t\_R  
1a2b\_A  
1a3n\_A  
1a3n\_C  
1a53\_A  
1a55\_A  
1a59\_A  
1a7d\_A  
1a7v\_B  
1a7w\_A  
1a8l\_A  
1a8l\_A  
1aa0\_A  
1aaw\_A  
1adj\_A  
1ado\_A  
1adw\_A  
1aee\_A  
1af6\_C  
1af7\_A  
1ag6\_A  
1aih\_A  
1ajo\_B  
1akd\_A  
1aku\_A  
1aky\_A  
1an1\_E  
1aod\_A  
1aox\_A  
1apz\_D  
1aqb\_A  
1aqy\_B  
1ar7\_4  
1asz\_B  
1aul\_B  
1aul\_B  
1aus\_L  
1aux\_B  
1avx\_A  
1aw3\_A  
1axk\_B  
1ay8\_A  
1aym\_1  
1ayo\_B  
1b02\_A  
1b0u\_A  
1b1y\_A  
1b21\_C

1b21\_A  
1b4k\_A  
1b4q\_A  
1b54\_A  
1b63\_A  
1b76\_B  
1b87\_A  
1b8g\_B  
1b8o\_A  
1b9h\_A  
1b9n\_A  
1b9n\_A  
1bcp\_E  
1bcs\_A  
1bd4\_D  
1bdo\_A  
1bem\_A  
1bf2\_A  
1bgv\_A  
1bi9\_A  
1bif\_A  
1bin\_A  
1blx\_A  
1bmt\_B  
1boo\_A  
1bou\_D  
1bou\_D  
1bow\_A  
1bp3\_A  
1bpe\_A  
1bpw\_A  
1bq6\_A  
1bq8\_A  
1brd\_A  
1brk\_A  
1brw\_A  
1bsv\_A  
1bsz\_A  
1bt4\_A  
1btg\_B  
1btn\_A  
1btw\_A  
1bvc\_A  
1bvy\_F  
1bw9\_A  
1bxm\_A  
1bzm\_A  
1c0a\_A  
1c0i\_A  
1c14\_B  
1c1m\_A  
1c1x\_A  
1c39\_A  
1c3o\_B

1c3s\_A  
1c3x\_B  
1c47\_A  
1c51\_K  
1c52\_A  
1c7g\_B  
1c7i\_A  
1c7n\_H  
1c8n\_C  
1c9k\_B  
1c9q\_A  
1c9s\_K  
1c9s\_Q  
1cah\_A  
1cbf\_A  
1cbl\_A  
1cc5\_A  
1cch\_A  
1ccp\_A  
1cde\_D  
1ces\_B  
1cg5\_A  
1cg5\_B  
1chn\_A  
1ci0\_A  
1ci6\_A  
1cim\_A  
1civ\_A  
1cja\_A  
1cjt\_C  
1cjt\_C  
1ck1\_A  
1ck1\_A  
1ck1\_B  
1ck1\_F  
1ckm\_A  
1cko\_A  
1cl1\_B  
1cl4\_A  
1cle\_B  
1cls\_D  
1cnj\_A  
1cnz\_B  
1co4\_A  
1coj\_A  
1coz\_A  
1cpm\_A  
1cpt\_A  
1cr1\_A  
1cs3\_A  
1ctt\_A  
1cur\_A  
1cvj\_A  
1cvl\_A

1cwu\_A  
1cx2\_B  
1cxy\_A  
1cyx\_A  
1cyy\_A  
1d03\_A  
1d06\_A  
1d09\_B  
1d0c\_B  
1d0l\_A  
1d0y\_A  
1d1g\_B  
1d2f\_B  
1d2j\_A  
1d2n\_A  
1d3y\_B  
1d5l\_C  
1d5n\_B  
1d7p\_M  
1d8d\_A  
1d8h\_A  
1d8u\_A  
1dad\_A  
1dah\_A  
1dap\_B  
1dar\_A  
1dbt\_A  
1dce\_D  
1dcp\_C  
1dcp\_H  
1dcq\_A  
1ddo\_C  
1ddo\_H  
1de0\_A  
1dek\_B  
1del\_A  
1dfg\_B  
1dfi\_X  
1dgd\_A  
1dgm\_A  
1dhj\_B  
1dhy\_A  
1dih\_A  
1dir\_B  
1dj3\_B  
1dj9\_A  
1dje\_A  
1dkp\_A  
1dl2\_A  
1dl5\_A  
1dl6\_A  
1dlj\_A  
1dlq\_A  
1dlr\_A

1dlw\_A  
1dly\_A  
1dm1\_A  
1dnp\_A  
1doi\_A  
1dpi\_A  
1dq3\_A  
1dq8\_A  
1dqi\_B  
1dqi\_C  
1dqn\_B  
1dr2\_A  
1dtx\_A  
1dub\_A  
1dug\_B  
1dv2\_A  
1dv6\_T  
1dva\_H  
1dvg\_B  
1dw0\_C  
1dx5\_L  
1dx8\_A  
1dx1\_C  
1dxm\_A  
1dxq\_D  
1dxr\_M  
1dyq\_A  
1e05\_I  
1e08\_D  
1e0j\_E  
1e0o\_C  
1e0o\_D  
1e12\_A  
1e2a\_C  
1e34\_B  
1e3a\_B  
1e3c\_P  
1e3s\_A  
1e3w\_B  
1e42\_A  
1e55\_A  
1e5q\_C  
1e5s\_A  
1e5z\_A  
1e6e\_A  
1e6u\_A  
1e6x\_M  
1e73\_M  
1e71\_B  
1e7m\_A  
1e87\_A  
1e8c\_B  
1e8e\_A  
1e8u\_B

1e8w\_A  
1e9l\_A  
1e9x\_A  
1eab\_A  
1eam\_A  
1eb0\_A  
1eb6\_A  
1ebf\_A  
1ebh\_B  
1ebo\_A  
1ebo\_F  
1ec9\_B  
1ecj\_C  
1ecq\_A  
1ee6\_A  
1ee8\_A  
1ee9\_A  
1ef0\_A  
1egg\_B  
1egm\_A  
1eh6\_A  
1eh7\_A  
1eir\_A  
1ej0\_A  
1ej6\_C  
1ekf\_B  
1elr\_A  
1em9\_A  
1en4\_A  
1ena\_A  
1eoi\_A  
1ep3\_A  
1eqh\_A  
1eqr\_A  
1eqr\_C  
1esm\_C  
1esn\_A  
1esr\_A  
1et4\_B  
1eu3\_A  
1eua\_B  
1euc\_B  
1eue\_A  
1ev6\_D  
1ev9\_D  
1evz\_A  
1ewc\_A  
1ewh\_B  
1ewh\_C  
1ex0\_B  
1exf\_A  
1ext\_A  
1exz\_A  
1eye\_A

1eyy\_D  
1ez0\_A  
1ezj\_A  
1ezl\_A  
1ezw\_A  
1ezw\_A  
1ezz\_B  
1f0x\_B  
1f17\_A  
1f1x\_B  
1f28\_B  
1f2n\_C  
1f37\_B  
1f56\_B  
1f7d\_A  
1f7p\_A  
1f7u\_A  
1f8v\_A  
1f97\_A  
1f99\_A  
1f9i\_A  
1f9x\_A  
1fao\_A  
1fb1\_D  
1fbm\_B  
1fbx\_E  
1fbx\_K  
1fc4\_B  
1fc5\_A  
1fcd\_B  
1fd8\_A  
1fdr\_A  
1fdv\_A  
1fe1\_G  
1fe1\_R  
1fea\_A  
1fec\_A  
1ff1\_A  
1ffu\_F  
1fgm\_A  
1fgx\_B  
1fgy\_A  
1fhv\_A  
1fi2\_A  
1fid\_A  
1fk4\_A  
1fkq\_A  
1flv\_A  
1fmc\_A  
1fn9\_A  
1fnt\_a  
1fnt\_G  
1fob\_A  
1fp4\_D

1fqt\_A  
1fr9\_A  
1fsu\_A  
1ft9\_A  
1fth\_B  
1fui\_F  
1fw2\_A  
1fwk\_A  
1fx4\_A  
1fxa\_B  
1xf\_A  
1fxw\_A  
1fz5\_C  
1fz6\_C  
1fzd\_E  
1fze\_F  
1g0v\_A  
1g2a\_A  
1g3m\_A  
1g3r\_A  
1g41\_A  
1g4p\_A  
1g55\_A  
1g60\_A  
1g63\_B  
1g63\_F  
1g6o\_B  
1g6t\_A  
1g71\_B  
1g73\_B  
1g8k\_F  
1g9s\_A  
1gal\_A  
1gc5\_A  
1gc6\_A  
1gcg\_A  
1gcg\_A  
1gcv\_B  
1ggf\_D  
1gh0\_O  
1ghe\_B  
1ghq\_B  
1gi5\_A  
1git\_A  
1gjv\_A  
1gjw\_A  
1gkl\_B  
1gks\_A  
1gl4\_A  
1gl6\_B  
1glc\_F  
1glp\_B  
1gm8\_B  
1gmi\_A



lgn1\_F  
lgos\_A  
lgot\_G  
lgoy\_A  
lgp2\_A  
lgp4\_A  
lgp7\_A  
lgpe\_A  
lgpj\_A  
lgqa\_A  
lgqc\_A  
lgqi\_B  
lgqk\_A  
lgqt\_B  
lgqy\_B  
lgqy\_B  
lgrt\_A  
lgrx\_A  
lgtN\_N  
lgtq\_B  
lgtt\_A  
lgui\_A  
lguo\_B  
lgut\_D  
lguy\_A  
lgv4\_A  
lgvf\_B  
lgvf\_B  
lgvk\_B  
lgb\_B  
lgxo\_A  
lgr\_A  
lgxu\_A  
lgy2\_B  
lgzf\_B  
lh04\_P  
lh0a\_A  
lh18\_A  
lh1c\_D  
lh1m\_B  
lh1p\_A  
lh1x\_A  
lh24\_C  
lh26\_A  
lh28\_A  
lh2m\_A  
lh2u\_X  
lh30\_A  
lh31\_F  
lh3e\_A  
lh3i\_B  
lh41\_B  
lh43\_A  
lh56\_A

1h5n\_C  
1h5q\_H  
1h6d\_A  
1h6g\_A  
1h6g\_A  
1h6x\_A  
1h70\_A  
1h72\_C  
1h7f\_B  
1h7h\_A  
1h7r\_A  
1h7u\_A  
1h9a\_A  
1h9u\_B  
1hbo\_F  
1hby\_A  
1hcu\_A  
1hcu\_B  
1hcz\_A  
1hda\_C  
1hdb\_C  
1hel\_A  
1hf3\_A  
1hfb\_C  
1hg5\_A  
1hgx\_A  
1hi1\_B  
1hi5\_A  
1hlm\_A  
1hlq\_A  
1hlq\_C  
1hmd\_A  
1hmw\_A  
1hmy\_A  
1ho4\_D  
1hp0\_B  
1hpi\_A  
1hpl\_A  
1hr6\_D  
1hr8\_F  
1hr9\_H  
1hrs\_A  
1hsk\_A  
1hsl\_A  
1hth\_A  
1huv\_A  
1hvy\_D  
1hw7\_A  
1hxd\_B  
1hxi\_A  
1hxr\_B  
1hyg\_A  
1hyh\_A  
1hyh\_C

lhzi\_A  
li18\_B  
li19\_A  
li1h\_A  
li1n\_A  
li1q\_A  
li22\_A  
li22\_B  
li27\_A  
li2k\_A  
li36\_A  
li43\_K  
li4h\_A  
li4h\_B  
li4y\_F  
li4y\_H  
li53\_A  
li58\_A  
li5e\_B  
li5g\_A  
li5l\_C  
li7a\_D  
li7l\_A  
li7q\_D  
li7w\_C  
li83\_B  
li8l\_A  
li95\_G  
li96\_K  
li96\_L  
li97\_N  
li97\_P  
li9b\_D  
li9c\_B  
li9g\_A  
li9j\_H  
li9t\_A  
li9z\_A  
lia0\_A  
lia9\_B  
lib1\_H  
libv\_D  
liby\_B  
libz\_B  
licl\_A  
licm\_A  
lid0\_A  
lid2\_C  
lie0\_A  
lie9\_A  
lifa\_A  
lig0\_B  
lig3\_A  
liih\_B

liin\_A  
liit\_A  
lijf\_B  
liji\_A  
liki\_A  
lim5\_A  
lini\_A  
lio3\_A  
lioz\_A  
lipe\_A  
liq3\_A  
liqp\_B  
liqx\_A  
liru\_A  
liru\_D  
liru\_D  
liru\_K  
liru\_O  
liru\_Q  
lis2\_A  
lis7\_O  
lis8\_P  
lisj\_A  
lisu\_A  
lith\_A  
liu9\_A  
liuv\_A  
livu\_A  
lix\_C  
lix\_E  
liy8\_B  
liyb\_B  
liyn\_A  
liyz\_A  
lize\_A  
lizl\_R  
lj0a\_C  
lj0e\_A  
lj0h\_A  
lj11\_A  
lj1t\_A  
lj1w\_C  
lj1y\_A  
lj24\_A  
lj3b\_A  
lj3b\_B  
lj3g\_A  
lj3l\_A  
lj3w\_D  
lj4g\_C  
lj5p\_A  
lj5u\_A  
lj78\_B  
lj84\_A

lj8e\_A  
lj9l\_B  
ljaf\_A  
ljax\_A  
ljaz\_A  
ljbo\_A  
ljcc\_A  
ljcc\_B  
ljcc\_C  
ljd4\_A  
ljdf\_D  
ljdi\_C  
ljdl\_A  
ljdt\_A  
lje1\_C  
lje5\_B  
ljer\_A  
ljf8\_A  
ljg4\_A  
ljgc\_B  
ljgc\_C  
ljgt\_B  
ljh8\_A  
ljhj\_A  
ljhn\_A  
lji2\_A  
lji4\_E  
lji5\_B  
ljig\_A  
ljip\_A  
ljjc\_B  
ljju\_C  
ljk0\_A  
ljk9\_B  
ljke\_B  
ljki\_A  
ljkn\_A  
ljlk\_A  
ljlr\_B  
ljmj\_A  
ljms\_A  
ljn7\_A  
ljn9\_B  
ljoe\_B  
ljoq\_A  
ljp8\_A  
ljpm\_A  
ljq4\_A  
ljqg\_A  
ljr3\_C  
ljr7\_A  
ljra\_A  
ljrl\_A  
ljs2\_C

1js9\_C  
1jt2\_A  
1jtk\_A  
1juv\_A  
1jv3\_A  
1jv7\_A  
1jvn\_A  
1jwa\_B  
1jwb\_D  
1jwh\_D  
1jxm\_A  
1jy7\_P  
1jy7\_X  
1jyl\_A  
1jzn\_C  
1jzr\_C  
1k0b\_C  
1k0e\_A  
1k0l\_A  
1k0n\_A  
1k0v\_A  
1k1o\_A  
1k1x\_A  
1k2e\_A  
1k2v\_N  
1k2y\_X  
1k39\_B  
1k3h\_A  
1k4m\_C  
1k6x\_A  
1k6z\_A  
1k73\_D  
1k7y\_A  
1ka0\_A  
1ka2\_A  
1kbz\_A  
1kcg\_C  
1kdi\_A  
1kdk\_A  
1kdp\_A  
1kdt\_A  
1ker\_A  
1kfd\_A  
1kfq\_A  
1kfq\_A  
1kh3\_D  
1kht\_C  
1kil\_A  
1k jy\_B  
1kkj\_A  
1kkl\_A  
1kkm\_B  
1kkt\_B  
1k17\_A

1klf\_D  
1klf\_H  
1km8\_A  
1kms\_A  
1kn1\_B  
1knr\_A  
1knw\_A  
1ko8\_A  
1kob\_A  
1koq\_B  
1kp4\_A  
1kpi\_A  
1kqc\_C  
1kqk\_A  
1kqm\_C  
1kqo\_D  
1kqo\_F  
1kqs\_X  
1kru\_B  
1kru\_C  
1krv\_C  
1ksk\_A  
1kuv\_A  
1kv3\_A  
1kvj\_A  
1kvw\_A  
1kvx\_A  
1kwh\_A  
1kws\_A  
1kxg\_F  
1kxq\_B  
1kyq\_C  
111e\_A  
111o\_C  
112e\_A  
113i\_B  
113p\_A  
113p\_A  
115p\_A  
115y\_B  
116m\_B  
117m\_B  
118o\_A  
119b\_C  
119m\_B  
1laf\_E  
1lag\_E  
1laj\_B  
1lba\_A  
1lbu\_A  
1lc7\_A  
1le6\_C  
1lfy\_B  
1lfz\_A

1lgh\_H  
1lgv\_B  
1lhs\_A  
1lir\_A  
1lk9\_B  
1lka\_A  
1llc\_A  
1lm1\_A  
1lo9\_A  
1loa\_F  
1loj\_C  
1loj\_D  
1loj\_G  
1loj\_M  
1lpc\_A  
1lqa\_B  
1lqk\_B  
1lrh\_A  
1ls9\_A  
1lsh\_A  
1lss\_C  
1lta\_E  
1ltl\_E  
1ltv\_A  
1lu0\_A  
1luc\_B  
1lv3\_A  
1lvu\_D  
1lvy\_A  
1lwh\_B  
1lwu\_J  
1lxy\_B  
1m1b\_A  
1m1j\_B  
1m1k\_4  
1m1k\_L  
1m1n\_C  
1m1o\_A  
1m2g\_A  
1m2v\_B  
1m32\_B  
1m36\_A  
1m3u\_H  
1m4g\_A  
1m5b\_C  
1m5k\_D  
1m6e\_X  
1m6m\_A  
1m6s\_D  
1m6s\_D  
1m6y\_A  
1m7g\_A  
1m7p\_B  
1m7s\_C



1m90\_4  
1m9q\_B  
1mai\_A  
1maw\_F  
1mb3\_A  
1mbb\_A  
1mbx\_A  
1mc0\_A  
1meh\_A  
1mep\_B  
1mg2\_C  
1mg2\_L  
1mg3\_P  
1mg5\_A  
1mih\_B  
1miv\_B  
1mj4\_A  
1mj1\_B  
1mjt\_B  
1mka\_A  
1mkm\_B  
1mky\_A  
1mlo\_A  
1mmf\_E  
1mms\_A  
1mmu\_B  
1mn7\_B  
1mn9\_C  
1mni\_B  
1mo8\_A  
1moh\_A  
1mok\_D  
1mpo\_C  
1mpx\_B  
1mq0\_B  
1mqv\_A  
1mr1\_C  
1mrs\_A  
1mto\_A  
1mtw\_A  
1mum\_B  
1mv8\_B  
1mww\_C  
1mwz\_A  
1mwz\_A  
1mxf\_A  
1my3\_A  
1mzj\_B  
1mzu\_B  
1n0j\_B  
1n0z\_A  
1n1i\_B  
1n1q\_A  
1n26\_A

1n2g\_A  
1n2l\_A  
1n2l\_A  
1n2x\_A  
1n2z\_A  
1n3s\_E  
1n3s\_G  
1n4r\_F  
1n5d\_A  
1n5l\_A  
1n6c\_A  
1n77\_A  
1n77\_B  
1n7u\_A  
1n83\_A  
1n97\_B  
1n9m\_C  
1n9x\_A  
1nbh\_C  
1nbw\_A  
1ncr\_D  
1ncs\_A  
1nd4\_A  
1nd6\_B  
1nda\_C  
1ne7\_A  
1nee\_A  
1nek\_D  
1nf2\_B  
1nf6\_F  
1nf8\_A  
1ng0\_C  
1ngk\_H  
1nh7\_A  
1nhw\_A  
1nip\_A  
1nit\_A  
1njr\_A  
1nkq\_A  
1nkq\_A  
1nks\_D  
1nli\_A  
1nlm\_B  
1nlq\_A  
1nly\_A  
1nm5\_B  
1nmb\_N  
1no3\_A  
1noi\_C  
1nox\_A  
1npg\_A  
1nqz\_A  
1nr0\_A  
1nr9\_D

lnrw\_A  
lnsa\_A  
lnsm\_B  
lnst\_A  
lnt4\_B  
lntm\_E  
lnu2\_A  
lnue\_D  
lnuf\_A  
lnul\_A  
lnup\_A  
lnvb\_B  
lnvm\_A  
lnvm\_B  
lnw1\_A  
lnw3\_A  
lnw7\_A  
lnxc\_A  
lnxj\_A  
lny3\_A  
lny5\_B  
lnyk\_B  
lnyq\_B  
lnyt\_B  
lnzd\_A  
lnzj\_A  
lnzr\_B  
lnzx\_G  
lo0s\_A  
lo1l\_D  
lo1v\_A  
lo2a\_A  
lo2r\_A  
lo3h\_A  
lo3w\_A  
lo4s\_B  
lo4t\_B  
lo4z\_B  
lo5l\_A  
lo5i\_B  
lo6l\_A  
lo6s\_B  
lo6v\_A  
lo6z\_D  
lo7l\_B  
lo8l\_A  
lo96\_A  
lo9r\_F  
lo9r\_F  
lo9t\_B  
loau\_H  
loau\_J  
loau\_N  
lobb\_A

locm\_B  
locy\_A  
lod2\_B  
lod5\_B  
lodj\_B  
lodz\_B  
loe7\_B  
loez\_Z  
lof6\_C  
lofc\_X  
lofq\_B  
lofq\_D  
lofr\_F  
log3\_A  
log6\_C  
logd\_D  
logp\_E  
loh4\_A  
lohb\_A  
lohf\_C  
loi0\_A  
loi6\_B  
loid\_A  
loid\_A  
loij\_B  
loj7\_B  
lojt\_A  
lojz\_A  
lok4\_E  
lok4\_J  
lokg\_A  
lokg\_A  
lomo\_A  
lomr\_A  
lon9\_A  
lopo\_B  
loqh\_A  
loqj\_A  
loqq\_A  
lor4\_A  
lord\_A  
lore\_A  
losn\_A  
lot4\_A  
lot8\_A  
lotw\_A  
lov8\_C  
loxv\_D  
loyj\_B  
lp0n\_B  
lp0w\_A  
lp0y\_B  
lp0z\_G  
lp1c\_B

1plj\_A  
1p2i\_A  
1p39\_A  
1p3h\_A  
1p3w\_A  
1p44\_B  
1p45\_B  
1p49\_A  
1p4d\_B  
1p4r\_B  
1p4v\_A  
1p5j\_A  
1p6x\_A  
1p7c\_B  
1p8l\_A  
1p9g\_A  
1p9l\_B  
1pbj\_A  
1pfv\_A  
1pg2\_A  
1pg5\_B  
1pg8\_A  
1phe\_A  
1pil\_A  
1pi6\_A  
1pie\_A  
1pij\_A  
1pjt\_B  
1pkd\_C  
1pkw\_A  
1pl7\_C  
1pmi\_A  
1pmj\_X  
1pmm\_B  
1pmm\_F  
1pn0\_D  
1pn4\_D  
1pnc\_A  
1poc\_A  
1poi\_A  
1pos\_B  
1pov\_0  
1ppt\_A  
1pq4\_B  
1pq8\_A  
1pqw\_A  
1pr0\_C  
1ps7\_D  
1psz\_A  
1ptv\_A  
1pwu\_A  
1pxe\_A  
1pyh\_2  
1pyh\_J

1pyh\_K  
1pyh\_S  
1pyt\_C  
1pz0\_A  
1pz1\_A  
1pz2\_B  
1pzh\_A  
1pzs\_A  
1pzw\_A  
1q05\_A  
1q05\_B  
1q0g\_G  
1q0s\_A  
1q19\_C  
1q1k\_A  
1q1w\_A  
1q23\_A  
1q2l\_A  
1q33\_A  
1q3h\_B  
1q3q\_B  
1q3s\_F  
1q43\_A  
1q4q\_D  
1q5e\_A  
1q5y\_C  
1q68\_A  
1q6t\_B  
1q7h\_A  
1q81\_L  
1q82\_L  
1q86\_1  
1q8j\_A  
1q8m\_A  
1q8y\_B  
1q90\_A  
1q90\_L  
1q92\_A  
1q99\_B  
1qab\_E  
1qao\_A  
1qap\_B  
1qbq\_B  
1qci\_A  
1qgn\_E  
1qgn\_G  
1qgw\_A  
1qh4\_D  
1qhf\_B  
1qhh\_A  
1qhy\_A  
1qin\_A  
1qip\_B  
1qjq\_A

1qjs\_A  
1qk3\_B  
1qkc\_A  
1qkj\_A  
1qkp\_A  
1ql0\_A  
1qlu\_B  
1qn2\_C  
1qnf\_A  
1qoz\_A  
1qre\_A  
1qs2\_A  
1qsm\_D  
1qvn\_A  
1qwr\_A  
1qwy\_A  
1qxs\_D  
1qy4\_B  
1qz9\_A  
1qzr\_A  
1qzv\_H  
1qzv\_W  
1qzw\_B  
1r1i\_A  
1r1n\_B  
1r1n\_D  
1r1n\_F  
1r23\_B  
1r2j\_A  
1r2m\_A  
1r44\_A  
1r4n\_B  
1r4w\_D  
1r4x\_A  
1r5t\_A  
1r5u\_M  
1r61\_B  
1r6o\_B  
1r6t\_A  
1r6v\_A  
1r8l\_B  
1r8m\_E  
1r8q\_A  
1r9l\_A  
1r9m\_B  
1r9p\_A  
1ra0\_A  
1rao\_A  
1ray\_A  
1rcx\_H  
1rcx\_K  
1rdf\_E  
1reo\_A  
1rf6\_D

lrhc\_A  
lri1\_A  
lrib\_B  
lrif\_A  
lrj6\_B  
lrjd\_C  
lrkq\_B  
lrkx\_B  
lrkx\_C  
lrj\_A  
lrlm\_B  
lrms\_A  
lro5\_A  
lrov\_A  
lrp0\_A  
lrp1\_A  
lrp4\_A  
lrqe\_A  
lrqn\_A  
lrrv\_A  
lrrv\_B  
lrte\_B  
lrtil\_A  
lrts\_B  
lrtx\_A  
lrus\_A  
lruw\_A  
lrx0\_B  
lrxq\_B  
lryi\_B  
lryp\_S  
lryq\_A  
lryq\_A  
lrzu\_B  
ls05\_A  
ls0p\_A  
ls0p\_A  
ls0w\_C  
ls16\_A  
ls1q\_A  
ls20\_A  
ls2c\_A  
ls2d\_B  
ls2k\_A  
ls49\_A  
ls4c\_B  
ls4d\_F  
ls4m\_B  
ls56\_B  
ls5g\_A  
ls5j\_A  
ls5k\_A  
ls5l\_j  
ls68\_A



1s6p\_A  
1s7n\_B  
1s85\_A  
1s8c\_A  
1s99\_A  
1sb3\_A  
1sbz\_B  
1sc6\_B  
1sdz\_A  
1sed\_C  
1seh\_A  
1sez\_A  
1sf3\_A  
1sf5\_A  
1sf8\_G  
1sfk\_A  
1sft\_A  
1sg4\_B  
1sgf\_A  
1sh3\_B  
1shk\_B  
1sil\_A  
1sjg\_A  
1sk7\_A  
1smm\_A  
1so0\_C  
1so6\_A  
1sp1\_A  
1sp8\_D  
1sp8\_D  
1sqb\_D  
1sqf\_A  
1sql\_I  
1sqv\_E  
1srk\_A  
1srr\_C  
1ss9\_A  
1ssq\_D  
1sst\_A  
1stp\_A  
1su0\_B  
1suo\_A  
1suv\_F  
1sve\_A  
1svi\_A  
1sx3\_C  
1sx6\_A  
1sxj\_A  
1sxj\_C  
1sxj\_D  
1sxj\_D  
1syo\_A  
1sz2\_A  
1sz2\_B

1sz3\_B  
1szj\_G  
1szz\_C  
1t09\_B  
1t0b\_A  
1t0b\_F  
1t0b\_G  
1t0f\_A  
1t0i\_B  
1t0o\_A  
1t0t\_W  
1t1e\_A  
1t2f\_B  
1t2x\_A  
1t3k\_A  
1t3q\_F  
1t47\_A  
1t4c\_B  
1t4w\_A  
1t5d\_X  
1t5j\_A  
1t61\_F  
1t69\_A  
1t6c\_A  
1t6w\_A  
1t6x\_A  
1t6z\_B  
1t8h\_A  
1t90\_D  
1t96\_A  
1ta9\_B  
1tae\_D  
1taq\_A  
1td2\_B  
1tdi\_B  
1tdj\_A  
1te2\_A  
1ted\_A  
1tgs\_Z  
1th1\_C  
1thj\_C  
1thn\_A  
1tiy\_B  
1tj3\_A  
1tjl\_I  
1tkc\_B  
1tke\_A  
1tmo\_A  
1tno\_B  
1tny\_L  
1toa\_B  
1tox\_A  
1tqy\_C  
1trz\_B

1tt4\_A  
1tu9\_A  
1tum\_A  
1tuu\_A  
1tuv\_A  
1tvc\_A  
1tvq\_A  
1tw2\_B  
1twi\_B  
1twy\_A  
1tx6\_C  
1txu\_A  
1ty2\_A  
1ty8\_A  
1ty9\_B  
1tz6\_A  
1tzf\_A  
1tzw\_A  
1u02\_A  
1u05\_B  
1u08\_A  
1u0b\_B  
1u0j\_A  
1u10\_C  
1u1i\_A  
1u2d\_C  
1u2w\_B  
1u2z\_C  
1u31\_B  
1u5k\_A  
1u5k\_A  
1u5u\_B  
1u5v\_A  
1u72\_A  
1u7h\_A  
1u7m\_A  
1u7p\_A  
1u80\_B  
1u85\_A  
1u96\_A  
1u9k\_B  
1u9z\_A  
1ube\_A  
1ubg\_A  
1uc3\_F  
1uc3\_G  
1uc5\_B  
1uc9\_A  
1udh\_A  
1udv\_A  
1ue0\_A  
1ue1\_B  
1ued\_B  
1uf3\_B

1uf9\_C  
1ugi\_G  
1ugw\_A  
1uha\_A  
1uis\_B  
1ujb\_A  
1ul3\_C  
1ulb\_A  
1um0\_D  
1umy\_A  
1umy\_D  
1unf\_X  
1uo9\_A  
1uoc\_A  
1uod\_A  
1up8\_A  
1upr\_A  
1ups\_A  
1ur0\_B  
1ur2\_A  
1ur4\_B  
1urj\_B  
1urk\_A  
1ury\_A  
1us5\_A  
1usy\_D  
1usy\_G  
1ut0\_B  
1ut5\_B  
1utd\_M  
1utd\_O  
1uu6\_A  
1uup\_D  
1uus\_A  
1uvi\_B  
1uvl\_C  
1uvm\_C  
1uvq\_A  
1uw0\_A  
1uw3\_A  
1uw5\_B  
1uw9\_K  
1uwk\_A  
1uwy\_A  
1uy3\_A  
1uzu\_A  
1uzw\_A  
1v1q\_B  
1v25\_B  
1v25\_B  
1v2b\_A  
1v2b\_B  
1v2f\_A  
1v2x\_A

1v33\_A  
1v3c\_A  
1v4w\_B  
1v5e\_A  
1v5r\_A  
1v5y\_B  
1v6d\_A  
1v6v\_B  
1v9a\_B  
1v9h\_A  
1v9q\_A  
1v9q\_A  
1v9u\_5  
1v9x\_A  
1vak\_A  
1vbb\_4  
1vbe\_4  
1vbg\_A  
1vbi\_A  
1vbl\_A  
1vcf\_A  
1vch\_C  
1vcv\_A  
1vcv\_B  
1ve3\_B  
1vef\_B  
1vem\_A  
1veq\_D  
1veq\_H  
1vev\_B  
1vey\_B  
1vfl\_A  
1vf2\_B  
1vfd\_A  
1vfo\_B  
1vfw\_A  
1vh8\_A  
1vhe\_A  
1vhl\_A  
1vhn\_A  
1vif\_A  
1vjr\_A  
1vl8\_A  
1vli\_A  
1vly\_A  
1vm6\_B  
1vp3\_A  
1vp4\_A  
1vp8\_A  
1vq0\_B  
1vq6\_K  
1vr0\_A  
1vrb\_D  
1vrt\_A

1vsf\_A  
1vsr\_A  
1vyg\_A  
1vz0\_D  
1vz4\_D  
1vzm\_A  
1w07\_B  
1w0c\_A  
1w1d\_A  
1w1w\_D  
1w2l\_A  
1w2v\_A  
1w32\_A  
1w3b\_A  
1w3h\_A  
1w3o\_A  
1w3r\_A  
1w3t\_D  
1w49\_B  
1w58\_1  
1w5b\_B  
1w5c\_F  
1w5e\_C  
1w5s\_B  
1w5t\_B  
1w5t\_B  
1w6k\_A  
1w6m\_B  
1w81\_A  
1w85\_B  
1w9d\_M  
1wa3\_D  
1wap\_D  
1wap\_R  
1wbj\_A  
1wc8\_A  
1wc9\_A  
1wco\_N  
1wcz\_A  
1wfx\_A  
1wii\_A  
1wir\_A  
1wkv\_B  
1wky\_A  
1wli\_B  
1wlv\_H  
1wmb\_A  
1wms\_A  
1wnb\_D  
1wnd\_A  
1wno\_B  
1wnt\_B  
1woq\_B  
1wov\_B

1wp4\_D  
1wpk\_A  
1wpw\_B  
1wq8\_A  
1wqa\_C  
1wro\_C  
1ws7\_A  
1wse\_B  
1wst\_A  
1wtf\_B  
1wuf\_B  
1wuo\_B  
1wuq\_A  
1wuw\_B  
1wve\_D  
1wwd\_A  
1wwj\_A  
1wwk\_A  
1wws\_A  
1wwz\_A  
1wy1\_A  
1wy7\_A  
1wy9\_A  
1wyv\_B  
1wyx\_B  
1wzc\_B  
1wzn\_C  
1x01\_A  
1x0g\_A  
1x0g\_C  
1x0p\_C  
1x0x\_A  
1x1a\_A  
1x1i\_A  
1x1v\_B  
1x31\_D  
1x35\_C  
1x35\_C  
1x3c\_A  
1x3x\_A  
1x46\_A  
1x54\_A  
1x6f\_A  
1x7h\_A  
1x7i\_B  
1x7p\_A  
1x8d\_B  
1x8j\_B  
1x8u\_A  
1x9i\_B  
1x9l\_A  
1xa1\_B  
1xai\_A  
1xc3\_A

1xcr\_B  
1xdg\_B  
1xdi\_A  
1xe7\_B  
1xea\_A  
1xf1\_A  
1xf6\_A  
1xfx\_E  
1xg5\_D  
1xh0\_A  
1xhc\_A  
1xhl\_B  
1xi3\_B  
1xim\_C  
1xjh\_A  
1xji\_A  
1xjj\_A  
1xjs\_A  
1xk1\_A  
1xkv\_B  
1xkw\_A  
1xl6\_A  
1xl8\_A  
1xlm\_B  
1xlt\_I  
1xm5\_B  
1xmk\_A  
1mx\_A  
1xnq\_N  
1xnr\_D  
1xof\_A  
1xog\_A  
1xpl\_C  
1xpu\_A  
1xpu\_B  
1xqa\_A  
1xr2\_B  
1xru\_A  
1rx\_A  
1xs1\_E  
1xs2\_D  
1xs5\_A  
1xsc\_A  
1xss\_A  
1xtf\_B  
1xtg\_A  
1xtv\_C  
1xu2\_B  
1xv2\_C  
1xv5\_A  
1xv1\_A  
1xvu\_A  
1xvv\_A  
1xw4\_X



1xw6\_C  
1xwf\_B  
1xx1\_D  
1xxa\_C  
1xxi\_E  
1xxr\_D  
1xxx\_F  
1xye\_B  
1xye\_C  
1xz4\_C  
1xz4\_D  
1xz5\_B  
1xzn\_A  
1y0c\_C  
1y0j\_B  
1y0z\_B  
1y10\_C  
1y22\_B  
1y2x\_A  
1y3i\_A  
1y3j\_A  
1y56\_B  
1y5e\_C  
1y5y\_C  
1y60\_D  
1y6h\_A  
1y6p\_B  
1y7b\_C  
1y7u\_B  
1y7v\_B  
1y81\_A  
1y8a\_A  
1y8o\_B  
1y9g\_A  
1y9q\_A  
1y9q\_A  
1yas\_A  
1yax\_D  
1yb0\_B  
1yb5\_A  
1ybu\_D  
1yci\_A  
1ydy\_A  
1yfd\_B  
1ygb\_A  
1ygp\_A  
1yit\_Y  
1yj9\_2  
1yjn\_3  
1ykp\_A  
1yle\_A  
1yn8\_C  
1yni\_B  
1ynq\_B

1yo7\_A  
1yob\_A  
1yp3\_C  
1yq2\_F  
1yq3\_D  
1yqe\_A  
1yr3\_C  
1yra\_B  
1yre\_B  
1yrp\_A  
1ys1\_X  
1ys4\_B  
1ys6\_B  
1ytc\_A  
1yu2\_A  
1yun\_A  
1yvp\_B  
1yvu\_A  
1yw0\_D  
1yw0\_D  
1yw4\_A  
1ywd\_A  
1ywg\_Q  
1ywq\_A  
1yxm\_B  
1z05\_A  
1z0u\_A  
1z11\_A  
1z13\_A  
1z1s\_A  
1z25\_A  
1z2c\_B  
1z2i\_D  
1z3h\_A  
1z3i\_X  
1z3u\_C  
1z44\_B  
1z5g\_D  
1z5v\_A  
1z69\_D  
1z6n\_A  
1z6o\_U  
1z6s\_B  
1z6z\_A  
1z72\_B  
1z7e\_D  
1z8r\_A  
1za0\_A  
1za0\_A  
1za4\_A  
1zap\_A  
1zat\_A  
1zbq\_F  
1zcu\_A

1zcw\_A  
1zd0\_A  
1ze1\_C  
1zei\_C  
1zem\_A  
1zfd\_A  
1zgj\_A  
1zh1\_B  
1zh8\_A  
1zhy\_A  
1zhz\_A  
1zjj\_B  
1zk3\_A  
1zk7\_A  
1zke\_D  
1zl9\_B  
1zlp\_B  
1zlq\_B  
1zlj\_B  
1zm7\_B  
1zmi\_B  
1zmx\_E  
1zmx\_F  
1znm\_A  
1zop\_A  
1zq1\_A  
1zq9\_B  
1zr9\_A  
1zrr\_A  
1zs6\_B  
1zsp\_A  
1zsw\_A  
1zsz\_C  
1zt2\_A  
1zt2\_C  
1zt5\_A  
1zuk\_B  
1zun\_A  
1zun\_B  
1zuq\_A  
1zuu\_A  
1zvc\_A  
1zx5\_A  
1zx8\_C  
1zx9\_A  
1zy2\_A  
1zy5\_A  
2081\_A  
2a06\_B  
2a0b\_A  
2a15\_A  
2a1k\_A  
2a1t\_C  
2a1u\_A

2a1u\_B  
2a1y\_A  
2a2d\_A  
2a2r\_B  
2a30\_C  
2a33\_B  
2a3l\_A  
2a4o\_A  
2a4w\_A  
2a5f\_B  
2a5l\_B  
2a5z\_C  
2a6r\_D  
2a7r\_A  
2a8l\_A  
2a8k\_B  
2a8y\_J  
2a98\_A  
2a9a\_A  
2a9d\_B  
2a9f\_A  
2a9g\_D  
2a9i\_A  
2aa6\_A  
2aac\_B  
2abj\_A  
2abk\_A  
2ac3\_A  
2acv\_A  
2adm\_B  
2ack\_B  
2afw\_B  
2afz\_B  
2ag5\_A  
2ag9\_B  
2ahw\_A  
2ahz\_A  
2ai7\_A  
2ai8\_A  
2aib\_A  
2aib\_B  
2aj7\_B  
2ajh\_A  
2ajp\_A  
2ajr\_A  
2ajr\_B  
2akf\_A  
2akl\_A  
2ako\_A  
2aky\_A  
2ale\_A  
2am4\_A  
2amc\_B  
2amt\_E

2amu\_A  
2an3\_B  
2anx\_A  
2ao2\_B  
2ap1\_A  
2apr\_A  
2aqc\_A  
2aqc\_A  
2arc\_B  
2arh\_A  
2ars\_A  
2as8\_A  
2au3\_A  
2auv\_A  
2av3\_B  
2avd\_A  
2avu\_F  
2aw2\_A  
2awc\_A  
2ax4\_A  
2axk\_A  
2axt\_x  
2ay1\_A  
2ayd\_A  
2ayj\_A  
2az1\_A  
2azd\_A  
2b06\_A  
2b25\_A  
2b30\_B  
2b3b\_C  
2b3f\_E  
2b3j\_C  
2b3t\_A  
2b3y\_A  
2b3y\_B  
2b3z\_B  
2b4b\_B  
2b4l\_A  
2b4q\_A  
2b50\_B  
2b58\_A  
2b5v\_A  
2b67\_B  
2b6h\_A  
2b7n\_B  
2b82\_A  
2b8g\_A  
2b9d\_A  
2b9e\_A  
2b9l\_A  
2ba9\_A  
2bb0\_B  
2bb3\_A

2bb6\_B  
2bb6\_C  
2bcc\_D  
2bcn\_A  
2bco\_A  
2bcp\_B  
2bd0\_C  
2bew\_A  
2bf0\_X  
2bff\_A  
2bgj\_A  
2bgm\_A  
2bh1\_A  
2bhi\_A  
2bih\_A  
2bis\_A  
2bjf\_A  
2bjr\_A  
2bk3\_A  
2bk5\_A  
2bka\_A  
2bkx\_A  
2bla\_A  
2blf\_A  
2blo\_A  
2bm9\_F  
2bo7\_D  
2bo7\_H  
2bo7\_J  
2bo8\_J  
2boa\_A  
2boa\_B  
2bon\_A  
2bpc\_A  
2bq1\_F  
2bqz\_E  
2br3\_D  
2br3\_F  
2brq\_A  
2brz\_A  
2bs4\_A  
2bs9\_H  
2bsy\_A  
2bt1\_A  
2btq\_A  
2buf\_A  
2bvh\_D  
2bwc\_B  
2bxr\_A  
2by9\_X  
2byc\_A  
2byl\_C  
2bz0\_B  
2bzc\_A

2bzd\_A  
2bzn\_G  
2c0c\_A  
2c13\_B  
2c11\_B  
2c2a\_A  
2c2g\_A  
2c36\_A  
2c39\_T  
2c3h\_D  
2c4m\_B  
2c4n\_A  
2c54\_A  
2c5c\_C  
2c5d\_D  
2c5s\_A  
2c60\_A  
2c6b\_A  
2c6z\_A  
2c71\_A  
2c8m\_B  
2c91\_J  
2c96\_A  
2c9h\_A  
2c9w\_B  
2c9x\_B  
2ca3\_B  
2ca4\_A  
2ca8\_A  
2cab\_A  
2cbu\_B  
2cc0\_A  
2ccv\_A  
2ccy\_B  
2cf7\_D  
2cfc\_A  
2cfo\_A  
2cg4\_B  
2cgz\_A  
2ci6\_A  
2cin\_A  
2cir\_A  
2cj3\_B  
2cj9\_B  
2cjz\_A  
2ckq\_A  
2ckq\_B  
2clp\_D  
2cnb\_D  
2cns\_A  
2cqz\_A  
2cqz\_D  
2cqz\_E  
2cr8\_A

2crw\_A  
2cs2\_A  
2cs7\_B  
2ct5\_A  
2ctb\_A  
2ctu\_A  
2ctz\_A  
2cul\_A  
2cun\_B  
2cv0\_C  
2cvj\_A  
2cwg\_B  
2cwg\_D  
2cwf\_B  
2cww\_B  
2cx8\_A  
2cxp\_A  
2cxx\_A  
2cy2\_A  
2cy4\_A  
2cyc\_B  
2cye\_A  
2cz2\_A  
2cz8\_A  
2czr\_A  
2d0b\_A  
2d0c\_A  
2d0u\_B  
2d1c\_A  
2d1r\_A  
2d1y\_C  
2d2c\_E  
2d36\_A  
2d3d\_A  
2d3m\_A  
2d3m\_B  
2d3q\_A  
2d40\_C  
2d4c\_A  
2d4e\_C  
2d4v\_B  
2d4v\_C  
2d5a\_A  
2d5h\_C  
2d5z\_C  
2d6f\_D  
2d73\_B  
2d8r\_A  
2d9g\_A  
2d9l\_A  
2d9m\_A  
2dab\_B  
2das\_A  
2dbr\_E



2dc1\_B  
2dc3\_A  
2dcl\_A  
2dcu\_B  
2dd4\_C  
2ddd\_A  
2ddx\_A  
2de3\_B  
2de5\_E  
2de7\_E  
2deb\_A  
2deg\_B  
2deg\_B  
2dei\_A  
2df3\_A  
2dge\_C  
2dgk\_C  
2dgk\_D  
2dgm\_A  
2dgm\_F  
2dh3\_A  
2dh4\_A  
2dhr\_A  
2di3\_A  
2djr\_A  
2djw\_B  
2djw\_G  
2dki\_A  
2dkn\_A  
2dlc\_X  
2dld\_B  
2dm6\_B  
2dob\_A  
2dpm\_A  
2dqb\_A  
2dr1\_A  
2dr3\_D  
2dre\_C  
2drr\_A  
2drs\_A  
2ds6\_B  
2dt5\_B  
2dt8\_A  
2dte\_B  
2dtt\_B  
2du2\_C  
2du8\_G  
2dub\_B  
2dur\_A  
2dvh\_A  
2dvm\_A  
2dvn\_B  
2dvz\_A  
2dw6\_D

2dwc\_B  
2dxb\_C  
2dxf\_A  
2dxx\_A  
2dy0\_A  
2dy3\_D  
2e0n\_B  
2e1b\_A  
2e1m\_A  
2e1r\_A  
2e2e\_A  
2e2o\_A  
2e2z\_A  
2e4u\_B  
2e5a\_A  
2e5m\_B  
2e5v\_B  
2e5w\_A  
2e5y\_B  
2e61\_A  
2e67\_A  
2e67\_C  
2e67\_F  
2e6c\_D  
2e6i\_A  
2e6i\_A  
2e6v\_E  
2e72\_A  
2e7i\_A  
2e7p\_C  
2e7r\_A  
2e7z\_A  
2e89\_A  
2e8h\_A  
2e8v\_A  
2e8y\_B  
2e9h\_A  
2ea7\_A  
2eab\_A  
2eb6\_A  
2eb6\_A  
2ebr\_A  
2ebv\_A  
2ef0\_A  
2efj\_A  
2efn\_A  
2eft\_A  
2efu\_A  
2eg3\_B  
2eg4\_A  
2egw\_A  
2egy\_C  
2eh6\_B  
2eih\_A

2eih\_B  
2eih\_B  
2ein\_D  
2ein\_L  
2ej9\_A  
2ejf\_C  
2ejq\_B  
2eju\_A  
2ekl\_A  
2elm\_A  
2eln\_A  
2elq\_A  
2elv\_A  
2ena\_A  
2eni\_A  
2eo4\_A  
2eo5\_A  
2eoi\_A  
2eou\_A  
2eoy\_A  
2epp\_A  
2eqe\_A  
2eqf\_A  
2eqg\_A  
2erv\_A  
2erv\_A  
2esh\_A  
2esr\_B  
2etv\_A  
2eu0\_B  
2euf\_A  
2euf\_A  
2eug\_A  
2ew2\_A  
2ewm\_B  
2ews\_A  
2exu\_A  
2exx\_A  
2ey4\_E  
2f02\_A  
2f06\_A  
2f17\_B  
2f18\_A  
2f1k\_B  
2f1o\_H  
2f22\_A  
2f2a\_A  
2f2e\_B  
2f44\_A  
2f48\_A  
2f49\_A  
2f4f\_A  
2f4i\_C  
2f59\_D

2f5t\_X  
2f5x\_B  
2f5z\_C  
2f5z\_J  
2f6k\_A  
2f6m\_A  
2f6r\_A  
2f6x\_B  
2f7t\_A  
2f8b\_B  
2f8l\_A  
2f8q\_B  
2f96\_B  
2f9i\_B  
2f9q\_D  
2f9u\_C  
2fc6\_A  
2fco\_B  
2fcr\_A  
2fcu\_A  
2fcu\_B  
2fdj\_A  
2fdr\_A  
2fdx\_A  
2fe8\_C  
2fff\_B  
2ffq\_A  
2fgc\_A  
2fgc\_A  
2fgh\_A  
2fgu\_A  
2fi1\_A  
2fid\_B  
2fit\_A  
2fiw\_A  
2fjc\_B  
2fjm\_B  
2fk6\_A  
2fkb\_A  
2fkn\_B  
2fl5\_D  
2fmx\_A  
2fn8\_A  
2fni\_A  
2fo0\_A  
2for\_A  
2fpc\_A  
2fpg\_B  
2fqd\_A  
2fqx\_A  
2fr6\_A  
2fr6\_D  
2fre\_B  
2frf\_A

2frh\_B  
2fs5\_A  
2ft0\_B  
2ftl\_E  
2ftm\_B  
2fug\_Z  
2fut\_A  
2fv2\_A  
2fvv\_A  
2fwe\_A  
2fyf\_A  
2fyr\_A  
2fyu\_D  
2fzj\_A  
2fzv\_A  
2g06\_A  
2g09\_A  
2g09\_A  
2g0d\_A  
2g0i\_A  
2g0i\_B  
2g0i\_B  
2g0w\_B  
2g18\_E  
2g1l\_A  
2glu\_A  
2g25\_A  
2g37\_B  
2g38\_B  
2g3f\_A  
2g3y\_A  
2g42\_B  
2g43\_A  
2g54\_A  
2g54\_A  
2g5f\_D  
2g5g\_X  
2g5w\_B  
2g64\_A  
2g78\_A  
2g7f\_A  
2g80\_A  
2g8c\_O  
2g8s\_A  
2g8s\_A  
2g8y\_A  
2g9h\_D  
2ga4\_A  
2ga7\_A  
2gag\_A  
2gag\_D  
2gb0\_B  
2gb2\_A  
2gb5\_A

2gc4\_K  
2gce\_C  
2gce\_D  
2gd2\_C  
2gd4\_B  
2gds\_B  
2gdv\_A  
2gdz\_A  
2ge3\_A  
2gej\_A  
2gf4\_A  
2gf6\_A  
2gfg\_A  
2ggd\_A  
2gge\_D  
2ggh\_D  
2ggh\_D  
2ggq\_A  
2ggs\_A  
2gh5\_B  
2gj3\_A  
2gjv\_C  
2gjv\_E  
2gk2\_B  
2gl5\_A  
2glu\_B  
2gm3\_E  
2gmp\_B  
2gms\_A  
2gn2\_A  
2gnf\_A  
2gnj\_A  
2gnv\_A  
2go7\_C  
2gp7\_A  
2gp7\_A  
2gpe\_D  
2gq8\_A  
2gqf\_A  
2gqk\_A  
2gqu\_A  
2gqx\_B  
2gru\_A  
2grx\_A  
2gs9\_A  
2gsl\_F  
2gsy\_G  
2gtl\_N  
2gtl\_N  
2gtl\_O  
2gu3\_A  
2gvc\_E  
2gwh\_A  
2gwl\_A

2gyp\_A  
2h0b\_C  
2h0b\_D  
2h0r\_E  
2h18\_A  
2h1f\_A  
2h11\_Q  
2h28\_A  
2h2a\_B  
2h2u\_B  
2h32\_A  
2h32\_A  
2h3h\_A  
2h43\_F  
2h47\_C  
2h4x\_A  
2h52\_A  
2h5m\_A  
2h5n\_A  
2h5y\_B  
2h6l\_A  
2h79\_A  
2h7c\_D  
2h7d\_B  
2h7s\_A  
2h92\_C  
2ha2\_A  
2ha8\_A  
2ha8\_B  
2hae\_D  
2hbs\_H  
2hcb\_D  
2hcr\_B  
2hek\_B  
2hes\_X  
2het\_A  
2hf1\_A  
2hfk\_A  
2hfo\_A  
2hfu\_A  
2hh7\_A  
2hhe\_B  
2hhe\_C  
2hi4\_A  
2hix\_A  
2hiy\_C  
2hjn\_A  
2hk9\_B  
2hkj\_A  
2hkv\_A  
2hkz\_A  
2hld\_V  
2hms\_B  
2hnk\_B

2hnl\_A  
2ho4\_B  
2hp2\_B  
2hq9\_A  
2hgy\_A  
2hrn\_A  
2hs6\_A  
2hsd\_D  
2hsi\_B  
2hti\_A  
2hty\_D  
2hue\_A  
2huh\_A  
2hv6\_A  
2hv7\_B  
2hvy\_A  
2hw1\_A  
2hw5\_A  
2hw5\_D  
2hwu\_A  
2hwu\_D  
2hx0\_A  
2hx1\_A  
2hxd\_A  
2hxg\_B  
2hxs\_A  
2hyd\_B  
2hyi\_C  
2hyj\_A  
2hzp\_A  
2i02\_A  
2i0z\_A  
2i2a\_A  
2i2o\_A  
2i2o\_B  
2i2r\_L  
2i2x\_C  
2i33\_A  
2i34\_A  
2i3d\_A  
2i3g\_A  
2i3h\_B  
2i47\_A  
2i51\_B  
2i52\_F  
2i55\_A  
2i5j\_B  
2i5m\_X  
2i5o\_A  
2i5o\_A  
2i5r\_B  
2i5u\_A  
2i61\_A  
2i65\_B



2i6q\_A  
2i71\_B  
2i76\_A  
2i79\_B  
2i7a\_A  
2i7f\_A  
2i7f\_B  
2i7h\_B  
2i7p\_B  
2i96\_A  
2i99\_A  
2i9p\_B  
2ia5\_H  
2iag\_A  
2ibd\_B  
2ibm\_A  
2ibp\_B  
2ici\_A  
2ick\_A  
2icp\_A  
2icy\_B  
2idj\_B  
2idx\_C  
2iec\_D  
2iej\_B  
2ies\_B  
2iew\_A  
2iey\_B  
2if7\_D  
2ifa\_B  
2ifa\_C  
2ifc\_C  
2ig3\_A  
2ig6\_A  
2igt\_C  
2ihu\_A  
2ihu\_A  
2ihu\_B  
2ii5\_A  
2ii5\_D  
2ii6\_A  
2iib\_A  
2iic\_D  
2ij2\_A  
2ijd\_1  
2ijd\_1  
2ijm\_B  
2ime\_A  
2iml\_A  
2iml\_D  
2imq\_X  
2imr\_A  
2imz\_B  
2ins\_D

2io4\_B  
2iop\_A  
2ipo\_B  
2iqq\_B  
2iqy\_A  
2iry\_A  
2isl\_B  
2iu9\_C  
2iun\_B  
2iuq\_B  
2iut\_B  
2iuu\_A  
2iuu\_B  
2iv3\_C  
2iv7\_A  
2ive\_A  
2ivf\_C  
2ivj\_A  
2ivn\_A  
2iw0\_A  
2iw3\_B  
2iw9\_D  
2iwa\_A  
2iwb\_A  
2iww\_A  
2ix1\_A  
2ix6\_E  
2ix7\_C  
2ixa\_A  
2ixi\_B  
2ixl\_C  
2iy4\_S  
2iyv\_A  
2izg\_B  
2izj\_A  
2j0f\_A  
2j12\_B  
2j16\_B  
2j1n\_C  
2j28\_N  
2j3u\_A  
2j41\_D  
2j4d\_B  
2j4j\_F  
2j4k\_D  
2j4k\_E  
2j4q\_A  
2j4r\_A  
2j4x\_A  
2j5s\_A  
2j5t\_C  
2j5t\_H  
2j66\_A  
2j68\_A

2j6a\_A  
2j6l\_C  
2j6l\_D  
2j7d\_B  
2j7h\_A  
2j7k\_A  
2j7m\_A  
2j7o\_A  
2j9e\_B  
2j9l\_C  
2j9n\_A  
2j9p\_A  
2j9u\_B  
2jae\_A  
2jag\_A  
2jap\_C  
2jb3\_B  
2jb4\_A  
2jb7\_A  
2jbs\_D  
2jcg\_A  
2jcg\_A  
2jd2\_A  
2jd6\_L  
2jd6\_L  
2jda\_B  
2jeb\_A  
2jeb\_I  
2jes\_I  
2jes\_M  
2jf3\_A  
2jfy\_A  
2jg1\_A  
2jg1\_D  
2jg7\_E  
2jgd\_A  
2jgr\_A  
2jgz\_A  
2jh3\_A  
2jhf\_A  
2ji5\_A  
2jis\_A  
2jiz\_N  
2jj1\_I  
2jjb\_A  
2jjp\_A  
2jjx\_B  
2jjz\_A  
2jjz\_C  
2jk1\_A  
2jkg\_A  
2jkv\_B  
2jkv\_D  
2jky\_B

2jll\_A  
2jlb\_A  
2jll\_A  
2jlv\_A  
2jm3\_A  
2joc\_A  
2jq5\_A  
2jr7\_A  
2jtg\_A  
2jxm\_A  
2jxy\_A  
2jz8\_A  
2k0g\_A  
2k0x\_A  
2k2d\_A  
2k4h\_A  
2k4x\_A  
2k5c\_A  
2k5t\_A  
2k6z\_A  
2k74\_A  
2k78\_A  
2k7r\_A  
2k8d\_A  
2kdp\_A  
2kdx\_A  
2kfu\_A  
2kgo\_A  
2kid\_A  
2kkd\_A  
2kkh\_A  
2kkr\_A  
2kkr\_A  
2kkt\_A  
2klh\_B  
2kmd\_A  
2kmx\_A  
2kn9\_A  
2kn9\_A  
2kny\_A  
2kpi\_A  
2kpn\_A  
2kq9\_A  
2kr5\_A  
2ksy\_A  
2kt4\_B  
2kv1\_A  
2kvg\_A  
2kvh\_A  
2kw4\_A  
2kzy\_A  
2l2e\_A  
2l47\_A  
2l4d\_A

2161\_A  
216m\_A  
216x\_A  
217p\_A  
218e\_A  
218h\_A  
2190\_A  
219z\_A  
21au\_A  
21cq\_A  
21ha\_A  
21iw\_A  
21jf\_A  
21js\_A  
21k5\_A  
21ki\_A  
21ko\_A  
21l8\_A  
21ml\_A  
21py\_A  
21qw\_A  
21vh\_A  
21xw\_A  
2m0d\_A  
2m0e\_A  
2m0p\_A  
2m3g\_B  
2m6s\_A  
2m7a\_A  
2m7b\_A  
2m7v\_A  
2m98\_A  
2m9w\_A  
2ma7\_A  
2mas\_C  
2mcm\_A  
2mgj\_A  
2mhb\_A  
2mhr\_A  
2mij\_A  
2mj9\_A  
2mje\_A  
2mkd\_A  
2mmh\_A  
2mrf\_A  
2ms0\_C  
2muc\_A  
2mur\_A  
2mwg\_B  
2mxv\_A  
2mxz\_A  
2myb\_A  
2n1r\_A  
2n24\_A

2n25\_A  
2n5h\_A  
2n5k\_A  
2n7l\_C  
2n8y\_A  
2n9o\_A  
2na0\_A  
2na5\_A  
2nab\_A  
2nax\_A  
2nb9\_A  
2ncd\_A  
2nlq\_D  
2nly\_A  
2nn7\_B  
2nnl\_F  
2no0\_B  
2no6\_A  
2nog\_A  
2np9\_A  
2npk\_A  
2nqy\_A  
2nr4\_A  
2nru\_B  
2ns1\_B  
2nsf\_A  
2nss\_A  
2ntk\_A  
2ntl\_B  
2nun\_A  
2nuw\_A  
2nv2\_F  
2nv2\_J  
2nvo\_A  
2nvv\_A  
2nvv\_C  
2nwb\_A  
2nx8\_A  
2nxp\_A  
2nxp\_H  
2nyg\_A  
2nyu\_A  
2nzu\_G  
2o05\_B  
2o0d\_A  
2o0j\_A  
2o14\_A  
2o18\_C  
2o2c\_B  
2o2r\_B  
2o2s\_A  
2o2z\_C  
2o36\_A  
2o4c\_B

2o4v\_B  
2o4z\_A  
2o56\_H  
2o6d\_A  
2o6h\_B  
2o74\_F  
2o7p\_A  
2o7s\_A  
2o7u\_E  
2o8q\_A  
2o97\_B  
2o9a\_A  
2o9a\_C  
2oaj\_A  
2oal\_B  
2oap\_2  
2ob0\_C  
2oba\_A  
2obb\_A  
2obv\_A  
2oby\_E  
2oc0\_A  
2ocz\_A  
2od0\_A  
2od5\_A  
2oda\_A  
2odp\_A  
2oee\_B  
2oel\_B  
2oel\_B  
2ofp\_B  
2og2\_A  
2og6\_A  
2og9\_A  
2oi0\_A  
2oi2\_A  
2oik\_D  
2oiw\_A  
2oj5\_A  
2okc\_B  
2okj\_B  
2okv\_B  
2okv\_C  
2olc\_A  
2olg\_A  
2oly\_H  
2om6\_B  
2on5\_C  
2onf\_B  
2onm\_G  
2onm\_J  
2ons\_A  
2oo0\_A  
2oog\_B

2ooi\_B  
2ooy\_E  
2opc\_A  
2oq2\_C  
2ord\_A  
2ore\_F  
2orp\_A  
2oso\_A  
2otl\_3  
2ou5\_A  
2ou6\_A  
2oui\_D  
2ow6\_A  
2owa\_A  
2owl\_B  
2owq\_B  
2ox4\_B  
2ox4\_E  
2oxc\_B  
2oxs\_A  
2oy0\_A  
2oy9\_B  
2oy9\_B  
2oyn\_A  
2oys\_B  
2oyy\_A  
2oyy\_C  
2ozb\_E  
2oze\_A  
2ozg\_A  
2p06\_B  
2p0h\_A  
2p0m\_A  
2p0s\_A  
2p0u\_B  
2p1n\_B  
2p1n\_E  
2p2b\_B  
2p35\_A  
2p3n\_B  
2p3p\_B  
2p42\_A  
2p4p\_A  
2p5v\_A  
2p5y\_A  
2p6e\_C  
2p6s\_A  
2p6w\_A  
2p7p\_F  
2p7v\_B  
2p88\_E  
2p88\_H  
2p8u\_A  
2p97\_A



2p9e\_A  
2p9u\_A  
2p9x\_A  
2pa8\_D  
2pad\_A  
2paj\_A  
2par\_B  
2pbf\_A  
2pbl\_B  
2pbz\_C  
2pc0\_A  
2pd3\_D  
2pd4\_B  
2pd7\_B  
2peb\_A  
2peb\_B  
2pfr\_A  
2pg0\_A  
2pg3\_A  
2pg5\_A  
2pg8\_C  
2ph1\_A  
2pig\_B  
2pix\_A  
2pj4\_A  
2pj5\_B  
2pjs\_B  
2pk3\_A  
2pke\_A  
2pkp\_A  
2plj\_A  
2plm\_A  
2pls\_G  
2plw\_A  
2pml\_X  
2pms\_D  
2pno\_J  
2po5\_B  
2po7\_A  
2pos\_A  
2pos\_A  
2pos\_D  
2pp1\_A  
2ppq\_A  
2ppt\_A  
2ppt\_A  
2pqj\_A  
2pqy\_A  
2pr1\_A  
2pr1\_B  
2pr5\_A  
2pr7\_B  
2prb\_A  
2prn\_A

2prz\_B  
2prz\_D  
2pse\_A  
2ptc\_E  
2ptf\_B  
2pul\_A  
2puz\_A  
2pvq\_A  
2pvx\_C  
2pwh\_B  
2px5\_B  
2pxx\_A  
2py2\_B  
2py2\_B  
2pyb\_B  
2pyu\_A  
2pyy\_B  
2pz0\_B  
2pz8\_A  
2pzn\_A  
2q0f\_B  
2q14\_G  
2q1d\_X  
2q1f\_A  
2q1s\_A  
2q2a\_A  
2q3p\_A  
2q46\_B  
2q4y\_A  
2q5e\_A  
2q5e\_F  
2q5l\_A  
2q5o\_A  
2q5z\_A  
2q5z\_B  
2q6h\_A  
2q6n\_F  
2q6o\_B  
2q6v\_A  
2q78\_F  
2q7s\_B  
2q85\_A  
2q8q\_A  
2q9c\_A  
2qa2\_A  
2qb6\_A  
2qcl\_A  
2qcu\_B  
2qdf\_A  
2qdg\_B  
2qe6\_A  
2qe9\_A  
2qe9\_A  
2qeb\_B

2qee\_E  
2qej\_C  
2qex\_T  
2qgi\_A  
2qgs\_A  
2qgy\_A  
2qh1\_B  
2qha\_B  
2qhf\_A  
2qio\_A  
2qji\_P  
2qjj\_D  
2qjk\_E  
2qjk\_N  
2qk4\_B  
2qkm\_B  
2qkw\_B  
2ql6\_D  
2qlt\_A  
2qlu\_A  
2qlw\_A  
2qlw\_B  
2qmu\_C  
2qnd\_A  
2qpm\_A  
2qpo\_C  
2qq6\_B  
2qqc\_E  
2qqd\_E  
2qqh\_A  
2qqp\_G  
2qry\_A  
2qry\_B  
2qry\_C  
2qsz\_A  
2qt0\_A  
2qt7\_B  
2qtn\_A  
2qtn\_A  
2qtr\_C  
2qtt\_A  
2qtv\_A  
2qu8\_A  
2qvh\_A  
2qvh\_B  
2qvn\_A  
2qw5\_A  
2qyi\_B  
2yyq\_A  
2qzc\_A  
2r0g\_A  
2r0m\_A  
2r11\_B  
2r13\_A

2r16\_A  
2r16\_A  
2r25\_B  
2r2g\_A  
2r2v\_C  
2r3b\_B  
2r42\_A  
2r49\_A  
2r5r\_A  
2r66\_A  
2r6g\_B  
2r6h\_A  
2r79\_A  
2r7a\_A  
2r7d\_A  
2r7k\_A  
2r8t\_A  
2r8u\_A  
2r8v\_A  
2r8z\_J  
2r93\_C  
2r94\_D  
2r96\_A  
2r9r\_A  
2raf\_A  
2rar\_A  
2rax\_E  
2rc5\_D  
2rcl\_A  
2rct\_A  
2rd9\_D  
2rdx\_D  
2re9\_A  
2ref\_B  
2reg\_A  
2reh\_A  
2rfc\_A  
2rfc\_B  
2rfg\_A  
2rg4\_A  
2rg4\_B  
2rgo\_A  
2rh4\_B  
2rhs\_C  
2ri1\_B  
2ri4\_B  
2riq\_A  
2rir\_E  
2rj2\_A  
2rji\_A  
2rjo\_A  
2rk1\_A  
2rk8\_A  
2rkb\_E

2rkv\_A  
2rl2\_A  
2rla\_B  
2rld\_A  
2rld\_A  
2rlt\_A  
2rmk\_A  
2rnb\_A  
2rpr\_A  
2rpz\_A  
2rsf\_A  
2rsq\_A  
2rsy\_B  
2rte\_D  
2rtl\_A  
2rtp\_B  
2ruu\_A  
2rv0\_A  
2rv1\_A  
2rv5\_A  
2sar\_A  
2taa\_C  
2tdm\_A  
2tdt\_A  
2udp\_A  
2uu7\_D  
2uul\_I  
2uul\_O  
2uuq\_A  
2uur\_A  
2uuu\_A  
2uvm\_A  
2uvq\_A  
2uwh\_A  
2uwj\_F  
2ux0\_C  
2uxh\_A  
2uy5\_A  
2uyk\_C  
2uyq\_A  
2uyr\_X  
2uz1\_B  
2uzb\_C  
2v0s\_A  
2v0y\_A  
2v15\_H  
2v24\_A  
2v27\_B  
2v30\_A  
2v38\_A  
2v3a\_A  
2v3g\_A  
2v3p\_A  
2v3t\_B

2v54\_A  
2v55\_C  
2v55\_C  
2v5k\_B  
2v62\_A  
2v7i\_A  
2v82\_A  
2v81\_A  
2v9k\_A  
2vao\_A  
2vat\_B  
2vbg\_A  
2vbq\_A  
2vbs\_A  
2vc5\_C  
2vdj\_A  
2vdv\_E  
2vee\_G  
2vf5\_X  
2vfc\_A  
2vfg\_B  
2vfj\_D  
2vfk\_A  
2vfr\_A  
2vfx\_E  
2vg1\_B  
2vg3\_C  
2vgr\_C  
2vgz\_A  
2vh3\_A  
2vha\_A  
2vhe\_A  
2vht\_B  
2vhw\_F  
2vhz\_A  
2vis\_C  
2vjj\_A  
2vmb\_A  
2vmh\_A  
2vmk\_B  
2vn2\_A  
2vn8\_A  
2vnr\_A  
2vou\_A  
2vow\_A  
2vpt\_A  
2vpw\_G  
2vq2\_A  
2vq5\_B  
2vqe\_M  
2vqf\_R  
2vqx\_A  
2vrd\_A  
2vrn\_A

2vrs\_C  
2vs1\_A  
2vsi\_B  
2vsn\_A  
2vso\_B  
2vsq\_A  
2vsu\_B  
2vsu\_D  
2vt3\_B  
2vue\_B  
2vut\_G  
2vuu\_B  
2vuu\_D  
2vuu\_L  
2vuu\_M  
2vuv\_A  
2vv7\_B  
2vv1\_H  
2vvp\_E  
2vx5\_A  
2vx9\_A  
2vxj\_D  
2vxj\_F  
2vxo\_B  
2vxt\_I  
2vy0\_A  
2vy4\_A  
2vyc\_F  
2vze\_A  
2vzs\_B  
2vzz\_C  
2w0c\_J  
2w0c\_L  
2w0t\_A  
2w0u\_A  
2w1b\_A  
2w1u\_B  
2w1w\_A  
2w2h\_A  
2w2l\_A  
2w2v\_D  
2w31\_B  
2w37\_A  
2w3n\_A  
2w3x\_C  
2w3z\_A  
2w44\_B  
2w46\_A  
2w47\_A  
2w4l\_E  
2w4y\_C  
2w5b\_A  
2w5q\_A  
2w67\_B

2w7d\_A  
2w8r\_A  
2w8x\_B  
2w98\_B  
2wae\_A  
2wag\_A  
2waq\_N  
2wat\_D  
2wb1\_O  
2wb4\_A  
2wbx\_A  
2wc1\_A  
2wc4\_C  
2wc6\_A  
2wca\_A  
2wcu\_B  
2wd4\_A  
2wd8\_D  
2wew\_A  
2wfk\_A  
2wfk\_B  
2wfk\_D  
2wg7\_A  
2wgc\_A  
2wgr\_A  
2wi9\_B  
2wia\_A  
2wim\_A  
2win\_B  
2win\_G  
2win\_J  
2wit\_A  
2wja\_A  
2wjj\_B  
2wju\_A  
2wk1\_A  
2wkk\_C  
2wkx\_A  
2wkx\_A  
2wle\_C  
2wll\_B  
2wlu\_A  
2wn2\_B  
2wn7\_A  
2wnb\_A  
2wnh\_A  
2wnl\_C  
2wno\_A  
2wns\_B  
2wny\_A  
2wo4\_A  
2wop\_A  
2wp4\_B  
2wpf\_B



2wpj\_S  
2wpx\_A  
2wqd\_A  
2wqm\_A  
2wqy\_P  
2wr8\_A  
2wsb\_B  
2wsi\_A  
2wss\_A  
2wta\_A  
2wtn\_A  
2wtn\_B  
2wts\_A  
2wul\_B  
2wva\_X  
2wvz\_B  
2ww0\_A  
2ww4\_A  
2wwr\_B  
2wwz\_C  
2wyh\_A  
2wyo\_A  
2wzv\_B  
2x03\_B  
2x0e\_B  
2x0i\_A  
2x0l\_A  
2x0n\_P  
2x0r\_A  
2x0u\_A  
2x0w\_B  
2x1a\_A  
2x3b\_A  
2x3k\_A  
2x3l\_B  
2x3y\_A  
2x3y\_H  
2x41\_A  
2x5c\_B  
2x5d\_D  
2x5f\_A  
2x5z\_B  
2x63\_A  
2x68\_A  
2x6b\_A  
2x6n\_A  
2x6n\_D  
2x75\_A  
2x7w\_A  
2x7x\_A  
2x8c\_B  
2x8t\_A  
2x8u\_B  
2x9o\_A

2x9v\_A  
2x9x\_A  
2xa9\_B  
2xb4\_A  
2xb5\_A  
2xb6\_D  
2xbf\_A  
2xbn\_A  
2xc0\_A  
2xc1\_A  
2xci\_A  
2xcu\_C  
2xdd\_B  
2xdh\_A  
2xdo\_B  
2xdq\_A  
2xec\_B  
2xf4\_A  
2xfn\_A  
2xfv\_B  
2xgt\_B  
2xhh\_A  
2xhk\_B  
2xhn\_A  
2xhn\_A  
2xio\_A  
2xj6\_A  
2xj9\_B  
2xjn\_C  
2xka\_G  
2xkk\_C  
2xko\_B  
2xkr\_A  
2xla\_C  
2xmr\_A  
2xon\_L  
2xpz\_A  
2xq1\_J  
2xq1\_P  
2xqr\_A  
2xqx\_A  
2xr7\_A  
2xrh\_A  
2xri\_A  
2xrp\_F  
2xs7\_A  
2xsc\_B  
2xsg\_A  
2xtj\_A  
2xts\_A  
2xtz\_A  
2xtz\_B  
2xum\_A  
2xv1\_A

2xva\_B  
2xvm\_A  
2xvz\_A  
2xw7\_A  
2xwb\_F  
2xwg\_B  
2xwm\_A  
2xwm\_B  
2xxa\_A  
2xxl\_A  
2xy4\_A  
2xy8\_A  
2xyk\_B  
2xyr\_A  
2y0o\_A  
2y0s\_P  
2y1g\_B  
2y31\_B  
2y3q\_E  
2y48\_A  
2y4o\_A  
2y4q\_A  
2y4r\_A  
2y6q\_B  
2y6q\_D  
2y7e\_B  
2yaz\_B  
2yb5\_F  
2ybg\_D  
2yc2\_B  
2yc4\_C  
2yce\_E  
2yce\_J  
2yck\_X  
2yd1\_A  
2ydc\_A  
2yed\_A  
2yep\_C  
2yes\_B  
2yfr\_A  
2yfu\_A  
2yg9\_A  
2ygm\_B  
2ygp\_A  
2ygq\_A  
2yi9\_E  
2yim\_A  
2yiu\_E  
2yj3\_A  
2yj4\_B  
2yjl\_A  
2yk3\_A  
2yk6\_A  
2yku\_A

2ymd\_G  
2ymv\_A  
2ymw\_B  
2ynm\_C  
2yol\_A  
2yox\_A  
2yp9\_A  
2ypt\_E  
2yqc\_A  
2yqh\_A  
2yqp\_A  
2yqz\_B  
2yr2\_B  
2yrk\_A  
2yrm\_A  
2yrr\_A  
2yrs\_B  
2ysa\_A  
2yta\_A  
2ytg\_A  
2yu2\_A  
2yu4\_A  
2yv9\_A  
2yvl\_B  
2yw2\_B  
2ywr\_A  
2yx6\_C  
2yxx\_A  
2yy7\_B  
2yy8\_B  
2yyl\_A  
2yyy\_A  
2yzb\_C  
2yzb\_H  
2yzm\_B  
2yzq\_A  
2z02\_B  
2z0a\_D  
2z1z\_B  
2z3g\_A  
2z3o\_A  
2z3p\_B  
2z41\_A  
2z5i\_E  
2z5x\_A  
2z67\_D  
2z6c\_B  
2z6f\_A  
2z6o\_A  
2z7b\_A  
2z7c\_C  
2z7e\_B  
2z8q\_B  
2zad\_D

2zai\_C  
2zax\_A  
2zb4\_A  
2zbl\_B  
2zbo\_E  
2zbw\_B  
2zcu\_A  
2zcz\_D  
2zdp\_A  
2ze3\_A  
2ze6\_A  
2zed\_B  
2zee\_B  
2zel\_A  
2zew\_B  
2zfu\_A  
2zgi\_A  
2zhh\_A  
2zhz\_A  
2zi8\_A  
2zif\_B  
2zim\_A  
2ziy\_A  
2zj0\_D  
2zj1\_B  
2zj5\_A  
2zjp\_Y  
2zjs\_Y  
2zk2\_A  
2zkb\_A  
2zkl\_A  
2zkm\_X  
2zny\_A  
2znz\_D  
2zp8\_B  
2zpl\_B  
2zpu\_A  
2zq0\_B  
2zr2\_B  
2zrm\_A  
2zru\_C  
2zrz\_D  
2zsg\_A  
2zsi\_A  
2zsj\_A  
2zt9\_H  
2zti\_A  
2zu8\_A  
2zue\_A  
2zus\_D  
2zut\_A  
2zvc\_A  
2zv1\_B  
2zw5\_B

2zwa\_B  
2zwv\_A  
2z xu\_A  
2zy3\_A  
2zy4\_F  
2zyh\_A  
2zzj\_A  
2zzj\_A  
2zzn\_A  
2z zs\_1  
2z zs\_N  
2z zs\_X  
2z zv\_A  
3a0u\_A  
3a11\_B  
3a15\_D  
3a11\_A  
3a23\_A  
3a25\_A  
3a2y\_A  
3a32\_A  
3a35\_B  
3a3y\_A  
3a43\_A  
3a4w\_A  
3a5r\_A  
3a6q\_B  
3a6t\_A  
3a7a\_C  
3a7q\_B  
3a7r\_A  
3a89\_A  
3a8i\_C  
3a8r\_B  
3a8t\_A  
3a99\_A  
3a9e\_B  
3a9f\_A  
3a9g\_A  
3a9l\_B  
3a9v\_A  
3a9z\_A  
3aam\_A  
3ab1\_B  
3ab4\_B  
3ab9\_A  
3abi\_A  
3abl\_S  
3abx\_A  
3ac0\_A  
3aci\_A  
3acl\_A  
3adc\_A  
3add\_A

3ae3\_C  
3aej\_C  
3af1\_A  
3afk\_A  
3afn\_A  
3afo\_A  
3ag1\_F  
3ag1\_S  
3agc\_A  
3agm\_A  
3agn\_A  
3agu\_A  
3ah2\_B  
3ahg\_A  
3ahm\_A  
3ahq\_A  
3ahr\_A  
3ai2\_G  
3ai3\_G  
3aia\_A  
3aia\_B  
3aib\_E  
3aic\_G  
3ajm\_A  
3ajx\_D  
3ak2\_A  
3ak4\_B  
3ak5\_B  
3ak9\_F  
3akh\_A  
3akm\_D  
3al5\_B  
3all\_B  
3alu\_C  
3am3\_A  
3amj\_C  
3amq\_A  
3amq\_C  
3anm\_B  
3ann\_A  
3anx\_B  
3ao1\_B  
3ao2\_A  
3aoe\_B  
3ap1\_B  
3ap2\_A  
3apt\_A  
3aq0\_G  
3aqj\_C  
3aql\_A  
3arl\_A  
3as5\_A  
3asi\_A  
3ask\_C

3aso\_F  
3atp\_A  
3atr\_A  
3aty\_A  
3atz\_A  
3auu\_A  
3av0\_B  
3aw8\_A  
3awd\_A  
3awj\_A  
3awo\_A  
3awq\_A  
3awu\_B  
3awx\_B  
3ax1\_A  
3ax1\_A  
3axh\_A  
3axs\_A  
3azr\_A  
3azx\_A  
3b00\_A  
3b05\_A  
3b06\_D  
3b0a\_E  
3b0u\_X  
3b1b\_B  
3b1c\_C  
3b1d\_A  
3b1f\_A  
3b1n\_B  
3b1v\_A  
3b1w\_A  
3b2e\_C  
3b3d\_C  
3b42\_B  
3b47\_A  
3b4r\_A  
3b4u\_A  
3b4y\_A  
3b55\_A  
3b59\_E  
3b5z\_D  
3b6m\_B  
3b6n\_A  
3b6o\_B  
3b70\_A  
3b74\_A  
3b7p\_C  
3b7w\_A  
3b8i\_F  
3b8t\_C  
3b9o\_A  
3b9z\_A  
3bal\_B



3bb6\_D  
3bb8\_B  
3bbd\_B  
3bbx\_U  
3bcc\_D  
3bcx\_A  
3bcx\_A  
3be6\_A  
3be7\_A  
3bem\_B  
3ber\_A  
3bf3\_A  
3bfj\_H  
3bfk\_D  
3bg9\_A  
3bga\_A  
3bgd\_B  
3bhf\_A  
3bhu\_D  
3bhu\_D  
3bi2\_A  
3bi4\_A  
3bix\_B  
3bj4\_A  
3bjd\_C  
3bjs\_B  
3bk5\_A  
3bkh\_A  
3ble\_A  
3blw\_M  
3bm1\_B  
3bm5\_A  
3bmq\_A  
3bn1\_A  
3bnk\_B  
3bnx\_B  
3boc\_A  
3bof\_A  
3bom\_D  
3boy\_B  
3bp8\_B  
3bpt\_A  
3bpw\_A  
3bpz\_C  
3bq6\_A  
3bqb\_X  
3bqb\_Z  
3bre\_B  
3brn\_A  
3brq\_A  
3btd\_E  
3bts\_B  
3btt\_E  
3bul\_A

3bud\_A  
3bui\_A  
3buj\_A  
3bus\_A  
3bus\_B  
3bvo\_A  
3bvq\_B  
3bw4\_A  
3bwl\_A  
3bwn\_F  
3bwv\_B  
3bx1\_C  
3bxg\_B  
3by0\_C  
3by6\_C  
3byn\_A  
3bza\_D  
3bjz\_A  
3bzn\_A  
3c01\_E  
3c03\_A  
3c0h\_A  
3c0o\_A  
3c1o\_A  
3c20\_B  
3c2c\_A  
3c2w\_D  
3c2y\_A  
3c37\_A  
3c3e\_A  
3c41\_J  
3c4a\_A  
3c4e\_C  
3c4n\_B  
3c5n\_A  
3c6a\_A  
3c6c\_A  
3c6h\_A  
3c6k\_D  
3c6l\_A  
3c6m\_C  
3c7g\_A  
3c7h\_A  
3c7j\_A  
3c7t\_C  
3c85\_C  
3c8f\_A  
3c8l\_A  
3c8v\_C  
3c8z\_B  
3c96\_A  
3c9f\_B  
3c9f\_B  
3c9h\_A

3c9h\_B  
3caw\_A  
3cb0\_A  
3cb2\_A  
3cce\_B  
3ccl\_B  
3ccm\_Y  
3ccr\_3  
3ccu\_T  
3cd3\_A  
3cdw\_A  
3cdx\_A  
3cdx\_B  
3ce6\_D  
3ce9\_D  
3cez\_A  
3cf8\_A  
3cfo\_A  
3cg4\_A  
3cg7\_A  
3cgh\_A  
3cgm\_A  
3cgx\_A  
3chl\_A  
3ci0\_I  
3cia\_A  
3cia\_B  
3cj7\_A  
3cj8\_A  
3cjc\_G  
3cji\_B  
3cjt\_E  
3c jy\_A  
3ckg\_A  
3cko\_A  
3clt\_D  
3clv\_A  
3cm6\_A  
3cme\_C  
3cmm\_C  
3cmq\_A  
3cng\_B  
3cnj\_A  
3cnl\_A  
3cnx\_C  
3co4\_A  
3co8\_A  
3co8\_B  
3cp5\_A  
3cp8\_C  
3cp8\_D  
3cq3\_C  
3crl\_B  
3crl\_B

3crv\_A  
3csl\_A  
3esm\_B  
3csq\_D  
3csv\_A  
3csw\_C  
3csx\_A  
3ct7\_B  
3ct7\_B  
3ct7\_C  
3ct8\_A  
3cts\_A  
3cu3\_A  
3cuk\_A  
3cuk\_B  
3cvg\_A  
3cvj\_A  
3cvz\_A  
3cw8\_X  
3cwb\_W  
3cwq\_B  
3cwy\_A  
3cx3\_B  
3cxm\_A  
3cxq\_A  
3cz0\_A  
3czl\_A  
3czv\_A  
3czx\_C  
3czx\_D  
3d07\_A  
3d0g\_B  
3d2d\_A  
3d2h\_A  
3d41\_A  
3d45\_A  
3d47\_F  
3d54\_I  
3d5j\_A  
3d6w\_A  
3d82\_D  
3d87\_D  
3d89\_A  
3d8n\_A  
3d8p\_A  
3d8v\_A  
3d9b\_A  
3d9d\_A  
3d9f\_B  
3d9g\_D  
3da1\_A  
3da3\_A  
3da8\_A  
3dan\_A

3dap\_A  
3dba\_A  
3dbh\_D  
3dbl\_H  
3dbn\_A  
3dbv\_O  
3dc2\_A  
3dc2\_B  
3dc6\_A  
3dc7\_B  
3dcb\_A  
3dcm\_X  
3ddd\_A  
3ddj\_A  
3ddl\_A  
3ddv\_B  
3de1\_X  
3de2\_X  
3dee\_A  
3deo\_A  
3dff\_A  
3dfy\_D  
3dfy\_H  
3dfy\_M  
3dg7\_D  
3dgi\_B  
3dgt\_A  
3dgv\_B  
3dh0\_B  
3dh1\_A  
3dh4\_C  
3dh4\_D  
3dhr\_H  
3dhy\_C  
3di1\_B  
3di4\_A  
3di5\_A  
3dkx\_A  
3dky\_A  
3dlc\_A  
3dm5\_A  
3dme\_B  
3dmt\_D  
3dnd\_A  
3dnf\_B  
3dnp\_A  
3dou\_A  
3dp5\_A  
3dqx\_B  
3dr0\_A  
3dr1\_A  
3dr8\_B  
3drw\_A  
3dsb\_A

3dt5\_A  
3dtn\_A  
3dtt\_B  
3du4\_B  
3du7\_C  
3duf\_C  
3dv0\_C  
3dv0\_D  
3dv9\_A  
3dwb\_A  
3dwg\_A  
3dx1\_A  
3dxj\_B  
3d xp\_A  
3dxs\_X  
3dxy\_A  
3dyd\_A  
3dye\_A  
3dyq\_A  
3dzc\_A  
3dze\_A  
3dzh\_B  
3dzm\_A  
3dzo\_A  
3dzv\_A  
3e03\_A  
3e12\_A  
3elt\_A  
3ely\_A  
3elz\_A  
3e23\_A  
3e24\_B  
3e2a\_A  
3e2i\_A  
3e2j\_C  
3e2v\_A  
3e31\_A  
3e39\_A  
3e3g\_A  
3e3u\_A  
3e46\_A  
3e4c\_B  
3e4d\_B  
3e4q\_A  
3e4v\_A  
3e4w\_A  
3e5p\_C  
3e5z\_B  
3e6q\_L  
3e6u\_A  
3e6z\_X  
3e77\_A  
3e7f\_B  
3e7j\_A

3e7l\_A  
3e7v\_A  
3e7w\_A  
3e81\_B  
3e8s\_A  
3e8x\_A  
3e9h\_A  
3e9i\_C  
3e9q\_B  
3ea4\_A  
3ea6\_A  
3eaf\_A  
3eau\_A  
3ebb\_B  
3ebe\_B  
3ebe\_C  
3ec1\_B  
3ec7\_F  
3eca\_A  
3eca\_D  
3ecr\_A  
3edo\_A  
3edy\_A  
3eef\_B  
3eey\_A  
3efl\_A  
3efo\_B  
3efr\_B  
3ehl\_A  
3ei8\_A  
3eib\_A  
3eif\_A  
3eih\_A  
3eii\_D  
3eip\_A  
3ejn\_A  
3ejn\_A  
3ek3\_A  
3ekg\_B  
3el3\_A  
3elc\_A  
3elc\_C  
3ele\_B  
3ele\_D  
3ell\_A  
3eln\_A  
3els\_A  
3elu\_A  
3emm\_A  
3en8\_A  
3en9\_A  
3enz\_A  
3enz\_C  
3eo3\_A

3e06\_B  
3e08\_C  
3e0b\_J  
3eof\_A  
3ep3\_A  
3ep9\_A  
3epa\_A  
3epm\_A  
3epy\_A  
3eqe\_A  
3eqo\_A  
3eqq\_A  
3eqq\_B  
3erg\_B  
3err\_A  
3es8\_A  
3es8\_E  
3esw\_A  
3etc\_B  
3eu3\_A  
3eu9\_A  
3eue\_A  
3euh\_A  
3euk\_H  
3euk\_H  
3evk\_B  
3ew5\_C  
3ewd\_A  
3ewk\_A  
3exn\_A  
3exs\_D  
3ey7\_A  
3eyx\_A  
3ez9\_A  
3ezw\_A  
3f0d\_D  
3f0m\_A  
3f0y\_C  
3f1j\_A  
3f1k\_A  
3f1t\_B  
3f1y\_A  
3f2v\_A  
3f3r\_A  
3f3s\_A  
3f4f\_A  
3f4n\_C  
3f5f\_A  
3f5m\_C  
3f5o\_H  
3f69\_B  
3f6h\_A  
3f6s\_A  
3f6s\_I



3f6u\_H  
3f6v\_A  
3f79\_E  
3f7o\_B  
3f7p\_D  
3f7p\_D  
3f8h\_A  
3f8k\_A  
3f92\_A  
3f9p\_B  
3f9p\_D  
3f9t\_B  
3fa3\_B  
3fa3\_K  
3fav\_D  
3fbu\_A  
3fbv\_C  
3fbv\_L  
3fca\_B  
3fcm\_B  
3fcr\_A  
3fcv\_B  
3fcy\_A  
3fd3\_A  
3fd3\_A  
3fe4\_B  
3fef\_B  
3fes\_C  
3fes\_D  
3feu\_A  
3ff1\_B  
3ffo\_A  
3ffr\_A  
3ffz\_A  
3fg9\_A  
3fgc\_A  
3fh0\_A  
3fha\_A  
3fha\_A  
3fhd\_A  
3fhl\_D  
3fig\_A  
3fii\_B  
3fij\_F  
3fj4\_A  
3fjg\_D  
3fju\_B  
3fju\_B  
3fkh\_C  
3fki\_L  
3fki\_L  
3fl8\_A  
3fm2\_A  
3fms\_A

3fmx\_X  
3fna\_B  
3fnb\_A  
3fp2\_A  
3fp5\_A  
3fp8\_E  
3fpa\_A  
3fpj\_B  
3fpv\_H  
3fqg\_A  
3fqm\_B  
3fmt\_A  
3fr6\_A  
3fr9\_A  
3frx\_D  
3fs1\_A  
3fsb\_A  
3fsn\_A  
3ftf\_A  
3fux\_C  
3fv9\_C  
3fvd\_B  
3fvu\_B  
3fw0\_A  
3fwf\_B  
3fwr\_B  
3fws\_B  
3fwz\_A  
3fx6\_A  
3fxg\_G  
3fxu\_A  
3fyb\_A  
3fyb\_A  
3fym\_A  
3fyn\_A  
3fyu\_E  
3fz0\_B  
3fz3\_B  
3fzg\_A  
3fzi\_A  
3fzy\_A  
3g0h\_A  
3g0k\_A  
3g1f\_A  
3g1z\_A  
3g22\_A  
3g2p\_A  
3g2y\_A  
3g3r\_A  
3g5o\_A  
3g5q\_A  
3g5t\_A  
3g6e\_B  
3g6o\_A

3g71\_A  
3g71\_B  
3g8b\_B  
3g8q\_A  
3g8r\_A  
3g8r\_A  
3g93\_C  
3gag\_A  
3gal\_B  
3gaz\_A  
3gb7\_C  
3gbh\_C  
3gbu\_B  
3gce\_A  
3gcm\_A  
3gd3\_A  
3gdh\_A  
3gdj\_A  
3gdp\_B  
3ge1\_D  
3ge4\_C  
3ge5\_A  
3gee\_A  
3geg\_B  
3gei\_A  
3gfa\_B  
3gfb\_B  
3gff\_B  
3gfr\_D  
3gfs\_A  
3gfv\_B  
3gfy\_B  
3gg7\_A  
3ggg\_D  
3gh7\_A  
3ghg\_I  
3ghg\_I  
3giu\_B  
3gj9\_A  
3gj9\_A  
3gjn\_C  
3gl9\_B  
3glq\_B  
3glv\_B  
3gma\_B  
3gmd\_H  
3gn5\_A  
3gn6\_C  
3gnd\_B  
3gnd\_O  
3gnd\_P  
3gni\_B  
3go7\_B  
3gob\_A

3gob\_C  
3goe\_A  
3gon\_A  
3gor\_A  
3gor\_C  
3gos\_A  
3gq1\_A  
3gqg\_A  
3gr3\_B  
3gr9\_C  
3gra\_A  
3grf\_A  
3grr\_A  
3gru\_A  
3gs2\_A  
3gsh\_B  
3gta\_B  
3gtv\_D  
3gu3\_A  
3gvd\_E  
3gvd\_I  
3gw6\_F  
3gwc\_A  
3gw1\_A  
3gwz\_C  
3gxa\_C  
3gxa\_F  
3gxy\_A  
3gy3\_A  
3gyb\_A  
3gyd\_B  
3gyg\_A  
3gyl\_B  
3gyx\_K  
3gz2\_A  
3h08\_B  
3h0g\_B  
3h0g\_J  
3h0g\_L  
3h0g\_N  
3h0l\_D  
3h0r\_G  
3h1j\_N  
3h1j\_S  
3h1q\_B  
3h2b\_B  
3h2s\_B  
3h31\_A  
3h36\_A  
3h39\_B  
3h3e\_A  
3h3p\_H  
3h4l\_B  
3h4s\_E

3h4v\_E  
3h5a\_C  
3h5c\_B  
3h6g\_B  
3h6o\_B  
3h6o\_C  
3h70\_A  
3h77\_B  
3h7c\_X  
3h7f\_B  
3h7f\_B  
3h7u\_A  
3h7v\_A  
3h85\_A  
3h87\_A  
3h87\_B  
3h8l\_B  
3h8s\_A  
3h8s\_A  
3h8t\_B  
3h97\_A  
3h9u\_A  
3hai\_A  
3hb0\_C  
3hbg\_A  
3hbl\_A  
3hbp\_A  
3hej\_B  
3hdg\_A  
3hdo\_A  
3hdp\_A  
3hf7\_A  
3hfg\_B  
3hft\_A  
3hgi\_A  
3hgw\_D  
3hgx\_B  
3hgy\_A  
3hgz\_A  
3hhe\_B  
3hhi\_A  
3hhj\_B  
3hi6\_A  
3hic\_A  
3hj1\_B  
3hj9\_A  
3hja\_A  
3hjk\_A  
3hjt\_A  
3hkt\_A  
3hlo\_A  
3hlp\_B  
3hly\_B  
3hlz\_B

3hm7\_B  
3hml\_B  
3hn1\_A  
3hn3\_E  
3hnh\_A  
3hnm\_A  
3ho5\_A  
3ho6\_A  
3hof\_C  
3hpa\_A  
3hpg\_B  
3hpg\_E  
3hpn\_D  
3hpz\_B  
3hq0\_D  
3hqd\_A  
3hqt\_B  
3hr4\_G  
3hr6\_A  
3hrd\_G  
3hsk\_A  
3hsv\_A  
3ht1\_A  
3hta\_A  
3htj\_A  
3htk\_C  
3htn\_A  
3hu2\_C  
3hug\_J  
3huj\_H  
3hus\_F  
3hwr\_B  
3hx6\_A  
3hy5\_A  
3hyp\_B  
3hyv\_C  
3hzh\_A  
3hzi\_A  
3i0p\_A  
3i12\_A  
3i16\_B  
3i2b\_L  
3i31\_A  
3i3o\_B  
3i3o\_B  
3i3t\_A  
3i3w\_A  
3i45\_A  
3i4i\_A  
3i4k\_F  
3i4x\_A  
3i54\_D  
3i56\_C  
3i57\_B

3i5c\_A  
3i5h\_C  
3i5u\_B  
3i5y\_A  
3i6d\_B  
3i6i\_A  
3i6t\_A  
3i6t\_B  
3i6v\_A  
3i77\_A  
3i7v\_B  
3i8b\_A  
3i8b\_A  
3i8x\_B  
3i92\_B  
3i92\_C  
3i98\_C  
3i98\_E  
3i9v\_H  
3ia7\_A  
3ia8\_B  
3iae\_A  
3iam\_4  
3iam\_5  
3iam\_7  
3iar\_A  
3iax\_A  
3ib5\_A  
3ib9\_A  
3ib9\_B  
3ibm\_B  
3ibr\_A  
3ibs\_A  
3ic3\_B  
3ic9\_C  
3ici\_A  
3ieh\_A  
3iei\_A  
3ieu\_A  
3if2\_B  
3ig2\_C  
3ig9\_B  
3ig9\_C  
3iga\_C  
3igs\_A  
3igy\_B  
3ihb\_A  
3ihg\_C  
3ihj\_A  
3ihp\_B  
3ihq\_A  
3iii\_A  
3iiv\_B  
3ij6\_A

3ik2\_A  
3ikh\_A  
3ikv\_A  
3ilm\_B  
3im0\_A  
3im9\_A  
3imp\_K  
3imx\_A  
3in1\_B  
3in6\_A  
3in9\_A  
3ip4\_B  
3ip5\_A  
3ipk\_A  
3ipr\_E  
3iqn\_A  
3iqt\_A  
3iqz\_E  
3ir0\_N  
3ir0\_W  
3irb\_A  
3irh\_C  
3is7\_A  
3isl\_B  
3it5\_A  
3it6\_B  
3it7\_A  
3iu6\_A  
3iup\_A  
3iuy\_A  
3iv6\_A  
3ivs\_A  
3ivs\_B  
3ivu\_B  
3iw4\_A  
3iwa\_A  
3iwf\_B  
3iwt\_A  
3ixc\_A  
3iy1\_G  
3j4k\_A  
3j4s\_A  
3j7h\_D  
3j7y\_0  
3j7y\_E  
3j81\_a  
3j81\_k  
3j82\_A  
3j8x\_B  
3j95\_C  
3j9d\_A  
3ja8\_3  
3ja8\_5  
3ja8\_6



3ja8\_7  
3jam\_J  
3jap\_I  
3jaq\_Q  
3jar\_B  
3jas\_B  
3jb7\_B  
3jb9\_B  
3jb9\_c  
3jb9\_X  
3jb9\_Y  
3jbb\_E  
3jd0\_A  
3jdw\_A  
3jq7\_D  
3jqm\_E  
3jqp\_D  
3jsa\_A  
3jsj\_C  
3jsk\_C  
3jt1\_A  
3jtd\_B  
3ju2\_A  
3juc\_A  
3jus\_B  
3juv\_A  
3jva\_F  
3jvf\_B  
3jvf\_B  
3jw4\_C  
3jwf\_B  
3jwg\_A  
3jwh\_A  
3jyg\_C  
3jyp\_A  
3jys\_A  
3jz6\_B  
3jzd\_D  
3k0t\_A  
3k0t\_C  
3k15\_A  
3k15\_A  
3k1f\_M  
3k1j\_A  
3k1m\_B  
3k1n\_B  
3k2b\_C  
3k2b\_F  
3k2i\_A  
3k38\_H  
3k38\_K  
3k39\_I  
3k3a\_D  
3k42\_B

3k4b\_A  
3k4i\_C  
3k4m\_F  
3k60\_A  
3k6h\_A  
3k6j\_A  
3k6x\_B  
3k7r\_B  
3k7y\_A  
3k8b\_B  
3k9u\_B  
3k9v\_A  
3k9v\_B  
3k9x\_B  
3ka7\_A  
3kak\_A  
3kb2\_A  
3kb6\_A  
3kbo\_D  
3kbr\_A  
3kc2\_A  
3kcg\_H  
3kd3\_A  
3kd6\_A  
3kdp\_C  
3kdy\_B  
3kew\_A  
3kez\_B  
3kf3\_B  
3kgd\_B  
3kgr\_B  
3kgw\_B  
3kgx\_A  
3kgy\_B  
3kgz\_B  
3khb\_B  
3khi\_A  
3ki8\_A  
3kjg\_A  
3kjh\_A  
3kkz\_A  
3klb\_A  
3klj\_A  
3klu\_A  
3kmh\_A  
3kmt\_B  
3kmv\_E  
3kn3\_B  
3knz\_A  
3knz\_C  
3ko1\_H  
3ko5\_C  
3kob\_B  
3koq\_A

3kpf\_A  
3kpt\_B  
3kpx\_A  
3kq0\_A  
3kq4\_E  
3kqg\_A  
3kqj\_A  
3ks6\_A  
3kst\_A  
3kt1\_A  
3kta\_A  
3ktb\_D  
3ktn\_A  
3ktw\_B  
3ku0\_B  
3ku1\_G  
3kui\_A  
3kvt\_A  
3kvu\_B  
3kvy\_B  
3kw0\_C  
3kws\_A  
3kx5\_B  
3kxa\_A  
3kyc\_B  
3kzb\_A  
3kzh\_A  
3kzn\_A  
3kzp\_A  
3l0a\_A  
3l0c\_B  
3l0f\_A  
3l12\_A  
3l1e\_A  
3l21\_B  
3l23\_A  
3l2n\_A  
3l31\_A  
3l3t\_D  
3l4g\_C  
3l4n\_A  
3l6h\_A  
3l6r\_A  
3l74\_G  
3l7t\_B  
3l7x\_A  
3l7y\_A  
3l8a\_A  
3l8e\_A  
3l8k\_A  
3l9b\_A  
3l9f\_B  
3l9l\_B  
3la2\_B

3lag\_B  
3lb3\_A  
3lb6\_D  
3lbc\_B  
3lbf\_C  
3lc6\_B  
3lcc\_A  
3lcn\_B  
3lcu\_A  
3ld0\_a  
3ld0\_j  
3ld2\_B  
3ld8\_A  
3ldu\_A  
3ldv\_A  
3lec\_A  
3lee\_D  
3lf2\_C  
3lf5\_B  
3lfi\_B  
3lft\_A  
3lgg\_A  
3lgh\_C  
3lgj\_A  
3lgx\_D  
3lhh\_A  
3lho\_A  
3lhr\_A  
3lhs\_A  
3lie\_A  
3lix\_A  
3lju\_X  
3lkb\_B  
3lkf\_A  
3lki\_B  
3lkk\_B  
3lku\_A  
3l13\_A  
3l14\_B  
3l19\_B  
3llx\_A  
3llx\_A  
3lm4\_A  
3lm4\_D  
3lm4\_D  
3lm5\_A  
3lm8\_C  
3lmg\_A  
3lnb\_A  
3lnc\_A  
3lnn\_A  
3lnv\_A  
3loc\_C  
3loo\_B

3loq\_A  
3lor\_B  
3lot\_B  
3lov\_A  
3lp9\_A  
3lpp\_B  
3lq0\_A  
3lqf\_D  
3lqv\_B  
3lrt\_B  
3lsj\_A  
3lst\_A  
3lsz\_A  
3lt1\_A  
3ltv\_A  
3ltv\_F  
3luj\_B  
3luu\_A  
3lvw\_A  
3lw7\_B  
3lxy\_A  
3ly1\_D  
3lyg\_A  
3lyr\_A  
3lzd\_A  
3lze\_A  
3lzk\_C  
3lzo\_B  
3lzz\_B  
3m0f\_A  
3m0i\_A  
3m12\_B  
3m1c\_A  
3m1m\_A  
3m1n\_B  
3m1y\_A  
3m2p\_B  
3m2r\_B  
3m2t\_B  
3m36\_A  
3m4g\_I  
3m4r\_A  
3m4w\_F  
3m5k\_A  
3m6m\_D  
3m6m\_E  
3m6v\_A  
3m7n\_A  
3m83\_F  
3m84\_A  
3mam\_A  
3mb5\_A  
3mbh\_A  
3mdd\_B

3mdl\_B  
3mds\_A  
3mdw\_D  
3mdz\_A  
3me3\_D  
3meb\_A  
3men\_A  
3mff\_D  
3mfq\_A  
3mfu\_A  
3mfu\_A  
3mg2\_A  
3mg5\_D  
3mg6\_H  
3mg6\_K  
3mga\_B  
3mgc\_A  
3mgd\_A  
3mgx\_B  
3mhh\_C  
3mhh\_E  
3mhm\_A  
3mi9\_A  
3mj5\_A  
3mjh\_B  
3mjv\_A  
3mk7\_L  
3mmz\_D  
3mo4\_A  
3mp2\_A  
3mp3\_E  
3mq2\_A  
3mq7\_E  
3mqh\_D  
3mqt\_D  
3mqt\_F  
3mqt\_V  
3msz\_B  
3mte\_B  
3mv4\_M  
3mvc\_A  
3mwc\_A  
3mwe\_A  
3mwf\_A  
3mwp\_B  
3mwp\_C  
3mx3\_A  
3myu\_B  
3mz8\_A  
3mz9\_A  
3n0a\_A  
3n0w\_A  
3n0y\_A  
3n0y\_A

3n1c\_A  
3n1f\_C  
3n1o\_B  
3n1s\_J  
3n26\_A  
3n29\_A  
3n2i\_B  
3n2n\_F  
3n3a\_D  
3n3k\_A  
3n4k\_A  
3n5n\_Y  
3n5o\_A  
3n60\_B  
3n6h\_B  
3n6h\_D  
3n6l\_A  
3n6q\_H  
3n7u\_C  
3n8u\_B  
3n8z\_A  
3n9l\_A  
3n9b\_B  
3n9i\_B  
3n9k\_A  
3n9r\_P  
3na1\_A  
3na5\_B  
3na8\_A  
3nat\_A  
3nba\_C  
3nba\_D  
3nbs\_A  
3nbx\_X  
3nc6\_B  
3nd1\_B  
3ndc\_A  
3nel\_A  
3nfd\_E  
3nfm\_A  
3ng7\_X  
3ngf\_B  
3ngl\_A  
3ngt\_F  
3nh8\_A  
3nh9\_A  
3nhq\_H  
3nix\_A  
3njh\_D  
3njr\_A  
3nk7\_B  
3nks\_A  
3nl1\_A  
3nl5\_A

3n15\_A  
3n11\_A  
3nm7\_A  
3nmi\_A  
3nmj\_D  
3nne\_C  
3nng\_A  
3nng\_B  
3nml\_B  
3nns\_B  
3no1\_C  
3no4\_A  
3no4\_B  
3no6\_A  
3nok\_A  
3nop\_C  
3nou\_C  
3noy\_B  
3nqn\_A  
3nr1\_B  
3nrb\_D  
3nre\_D  
3nrj\_F  
3nrn\_A  
3nrt\_A  
3ns1\_C  
3ntn\_A  
3nug\_B  
3nut\_C  
3nuv\_A  
3nvn\_B  
3nwb\_A  
3nwe\_A  
3nwo\_A  
3nwz\_C  
3nxl\_B  
3nxl\_C  
3nxs\_A  
3nxx\_A  
3nye\_A  
3nyi\_B  
3nyo\_B  
3nzp\_A  
3nzt\_A  
3nzz\_A  
3o01\_B  
3o0h\_B  
3o14\_B  
3o14\_B  
3o15\_A  
3o2e\_A  
3o3c\_A  
3o3m\_D  
3o3n\_C



3o3p\_B  
3o55\_A  
3o5b\_A  
3o6d\_A  
3o8c\_A  
3o90\_B  
3oa2\_B  
3oa4\_A  
3oa8\_B  
3oa8\_D  
3oa8\_E  
3oaj\_B  
3oba\_D  
3obk\_A  
3obk\_B  
3oc4\_A  
3oca\_B  
3ocd\_C  
3ocy\_A  
3ocz\_A  
3oee\_D  
3oeh\_B  
3oeh\_C  
3oet\_B  
3oev\_K  
3of2\_A  
3of4\_A  
3ofk\_A  
3ofn\_A  
3ofn\_M  
3ogr\_A  
3oh2\_A  
3oh4\_A  
3ohi\_A  
3ohs\_X  
3oi7\_A  
3oi7\_B  
3oib\_A  
3oid\_B  
3oif\_A  
3oij\_B  
3ois\_A  
3oix\_C  
3oiy\_A  
3oj6\_B  
3ojl\_A  
3ojo\_A  
3oka\_A  
3okk\_A  
3okp\_A  
3oks\_C  
3okx\_A  
3ol5\_A  
3olb\_I

3om7\_D  
3omb\_A  
3ome\_D  
3omy\_B  
3onn\_A  
3onr\_A  
3oo6\_A  
3oo6\_B  
3opk\_C  
3opy\_D  
3oq3\_A  
3orf\_C  
3orh\_A  
3orj\_A  
3ork\_A  
3os4\_A  
3os4\_A  
3oss\_D  
3oth\_A  
3oti\_A  
3otk\_A  
3ou7\_A  
3oum\_A  
3out\_C  
3ovs\_B  
3ovw\_A  
3ow2\_K  
3owa\_C  
3owc\_A  
3owv\_B  
3ox6\_E  
3oxh\_A  
3oxo\_F  
3oy7\_B  
3oyr\_A  
3oz2\_A  
3ozb\_A  
3ozm\_A  
3p0z\_A  
3p13\_A  
3p1m\_H  
3p24\_A  
3p27\_B  
3p2a\_A  
3p2h\_A  
3p2n\_A  
3p3c\_A  
3p3o\_A  
3p47\_A  
3p5n\_B  
3p70\_H  
3p7f\_D  
3p7i\_A  
3p7n\_A

3p8v\_A  
3p9c\_A  
3p9l\_D  
3p9l\_E  
3p9y\_B  
3paj\_B  
3paq\_A  
3pbm\_B  
3pc4\_A  
3pc8\_B  
3pcb\_M  
3pcb\_N  
3pcc\_M  
3pce\_R  
3pch\_M  
3pch\_O  
3pch\_R  
3pcj\_O  
3pck\_P  
3pdu\_E  
3pe0\_B  
3ped\_A  
3pef\_D  
3peg\_A  
3pf3\_A  
3pfd\_D  
3pfp\_A  
3pfr\_D  
3pfs\_A  
3pft\_A  
3pft\_B  
3pgv\_A  
3ph7\_B  
3phi\_B  
3pif\_C  
3pij\_B  
3pio\_C  
3pip\_U  
3piv\_B  
3pje\_B  
3pk0\_C  
3pk7\_A  
3pkw\_A  
3pl1\_A  
3plq\_A  
3pls\_A  
3pm0\_A  
3pm6\_A  
3pm9\_F  
3pmm\_A  
3pn7\_F  
3pnd\_C  
3pns\_E  
3poa\_A

3poa\_A  
3poh\_A  
3poy\_A  
3pp9\_A  
3ppv\_A  
3ppz\_B  
3pqc\_B  
3pqi\_A  
3pr3\_A  
3pr8\_C  
3psh\_A  
3ptb\_A  
3ptz\_C  
3pvh\_A  
3pvt\_A  
3pvz\_A  
3pw1\_A  
3pw3\_A  
3pwx\_A  
3pxp\_A  
3pxv\_B  
3pxx\_A  
3pym\_A  
3pyz\_A  
3pzc\_A  
3pzi\_A  
3q01\_A  
3q03\_B  
3q13\_A  
3q1o\_A  
3q2k\_C  
3q2k\_N  
3q2m\_A  
3q2o\_B  
3q2r\_A  
3q31\_A  
3q33\_A  
3q34\_A  
3q34\_B  
3q3g\_G  
3q3h\_A  
3q4o\_A  
3q6d\_B  
3q6i\_A  
3q6k\_B  
3q7h\_A  
3q7j\_A  
3q80\_A  
3q87\_A  
3q87\_B  
3q8i\_A  
3q8j\_A  
3q8x\_D  
3q9c\_K

3q9e\_G  
3q9f\_B  
3q9o\_A  
3qaw\_A  
3qax\_B  
3qay\_C  
3qb5\_K  
3qbd\_A  
3qbm\_A  
3qbw\_B  
3qc6\_X  
3qcp\_A  
3qd2\_B  
3qdh\_A  
3qdk\_A  
3qdl\_A  
3qdq\_A  
3qed\_A  
3qee\_B  
3qf7\_A  
3qfe\_A  
3qff\_A  
3qff\_B  
3qfy\_A  
3qi9\_A  
3qib\_B  
3qix\_A  
3qj0\_A  
3qj4\_A  
3qjg\_E  
3qke\_H  
3qkg\_A  
3qku\_A  
3qku\_B  
3qlb\_A  
3qm2\_B  
3qm3\_E  
3qml\_C  
3qn0\_E  
3qn9\_A  
3qnm\_A  
3qns\_A  
3qqp\_C  
3qr0\_A  
3qsi\_D  
3qsj\_A  
3qsy\_A  
3qsz\_B  
3qt1\_I  
3qu8\_C  
3qui\_A  
3quo\_A  
3qv1\_A  
3qv1\_F

3qv2\_A  
3qvh\_A  
3qvm\_B  
3qw2\_C  
3qw8\_A  
3qwb\_C  
3qwb\_D  
3qwu\_A  
3qx9\_B  
3qxe\_C  
3qxs\_A  
3qxy\_A  
3qyf\_A  
3qyy\_B  
3qz1\_A  
3qz6\_A  
3qzm\_A  
3qzp\_B  
3r03\_A  
3r09\_A  
3r0n\_A  
3r0q\_G  
3r10\_A  
3r11\_B  
3r18\_A  
3r1a\_B  
3r1i\_A  
3r1j\_B  
3r2q\_A  
3r3r\_A  
3r3t\_A  
3r3y\_A  
3r3z\_A  
3r44\_A  
3r4c\_A  
3r4z\_B  
3r5c\_A  
3r5c\_B  
3r5y\_D  
3r6f\_A  
3r6o\_A  
3r6q\_H  
3r6s\_B  
3r6w\_A  
3r79\_B  
3r8x\_A  
3r98\_A  
3r9c\_A  
3r9g\_A  
3r9i\_D  
3r9j\_A  
3r9r\_A  
3rc7\_A  
3rcm\_A

3rcy\_F  
3rcy\_F  
3rdk\_A  
3rdq\_A  
3re8\_A  
3red\_H  
3rez\_C  
3rfe\_A  
3rfu\_D  
3rfx\_B  
3rg0\_A  
3rg2\_C  
3rgb\_B  
3rgg\_A  
3rgu\_C  
3rgw\_L  
3rgz\_A  
3rh7\_A  
3rh7\_C  
3rha\_A  
3rhd\_C  
3rhh\_D  
3rht\_A  
3rht\_C  
3ric\_A  
3rii\_A  
3rir\_A  
3rk1\_B  
3rkr\_A  
3rku\_D  
3rlb\_B  
3rms\_C  
3rnm\_C  
3ro6\_C  
3ro6\_C  
3ro8\_C  
3ro8\_F  
3ro9\_B  
3roe\_D  
3rop\_B  
3rp8\_A  
3rpd\_A  
3rpe\_A  
3rq1\_B  
3rq5\_A  
3rqd\_A  
3rqi\_A  
3rqq\_A  
3rqw\_A  
3rqw\_H  
3rr5\_A  
3rra\_B  
3rrm\_A  
3rrv\_B

3rrw\_A  
3rs8\_A  
3rsb\_B  
3rsc\_B  
3rsn\_A  
3rss\_A  
3rt0\_A  
3rt1\_C  
3rtk\_A  
3rto\_D  
3rtx\_A  
3rtx\_B  
3rv0\_A  
3rv0\_B  
3rwb\_D  
3rxa\_A  
3rxl\_A  
3rxm\_A  
3rxz\_C  
3ry2\_B  
3ryo\_I  
3ryp\_A  
3ryz\_A  
3s1e\_A  
3s1j\_A  
3s1v\_A  
3s21\_A  
3s2r\_B  
3s2y\_A  
3s2z\_A  
3s3g\_A  
3s55\_C  
3s5f\_B  
3s6b\_A  
3s6h\_A  
3s6v\_A  
3s70\_A  
3s7o\_A  
3s7q\_A  
3s7z\_B  
3s86\_B  
3s8a\_A  
3s9n\_A  
3sai\_B  
3san\_B  
3sao\_B  
3sba\_B  
3sbx\_F  
3sc6\_D  
3scq\_A  
3scv\_A  
3scz\_A  
3sd9\_A  
3sdj\_D



3sdj\_E  
3ser\_A  
3sew\_A  
3sfv\_A  
3sfx\_B  
3sfz\_A  
3sgi\_A  
3sh5\_A  
3shq\_A  
3shr\_A  
3shs\_A  
3shs\_A  
3sik\_A  
3sip\_F  
3six\_A  
3siy\_B  
3sja\_I  
3sjn\_A  
3sjn\_B  
3skd\_A  
3sl9\_B  
3smp\_B  
3smv\_A  
3so1\_H  
3som\_L  
3son\_A  
3soy\_A  
3sp4\_B  
3sqg\_D  
3sra\_B  
3ss5\_C  
3ss7\_X  
3st1\_A  
3stp\_A  
3sub\_A  
3sw1\_B  
3swf\_B  
3sws\_C  
3sxm\_A  
3sxn\_A  
3sxn\_D  
3sxp\_D  
3sy8\_B  
3sy8\_B  
3sz3\_A  
3sz4\_A  
3t0u\_B  
3t1r\_C  
3t33\_A  
3t35\_D  
3t37\_A  
3t3o\_A  
3t3w\_E  
3t3w\_F

3t3z\_D  
3t44\_A  
3t4k\_A  
3t4r\_A  
3t54\_A  
3t58\_B  
3t5p\_L  
3t66\_A  
3t6f\_A  
3t6q\_A  
3t6s\_B  
3t8i\_A  
3t8i\_C  
3t8q\_B  
3t9k\_A  
3t9q\_B  
3tat\_C  
3taw\_A  
3taz\_A  
3tb6\_A  
3tb8\_A  
3tbd\_A  
3tbm\_B  
3tbo\_A  
3tc1\_B  
3tc3\_A  
3tc3\_B  
3tcy\_A  
3td3\_F  
3td7\_A  
3td9\_A  
3tdp\_A  
3tdt\_A  
3te9\_A  
3teb\_B  
3ten\_B  
3tep\_A  
3tfa\_B  
3tfd\_A  
3tfg\_A  
3tfj\_A  
3tfq\_D  
3tia\_B  
3tia\_D  
3tik\_C  
3tj7\_C  
3tj9\_A  
3tji\_D  
3tk7\_A  
3tlj\_A  
3tmg\_A  
3tnj\_A  
3tnp\_F  
3tnz\_A

3tou\_A  
3tox\_G  
3tox\_I  
3toz\_G  
3tp4\_B  
3tp9\_A  
3tpv\_B  
3tpw\_A  
3tq5\_A  
3tq8\_A  
3tqh\_A  
3tqu\_A  
3tri\_A  
3tsa\_B  
3tsn\_C  
3tts\_B  
3tts\_D  
3tts\_E  
3ttv\_D  
3tu6\_A  
3tui\_C  
3tur\_A  
3tuv\_A  
3tva\_A  
3tvi\_E  
3tvk\_A  
3tw4\_A  
3twa\_A  
3twb\_C  
3ty5\_B  
3ty7\_B  
3tz6\_A  
3tzf\_A  
3tzo\_B  
3u02\_A  
3u0d\_A  
3u0o\_B  
3u1b\_A  
3u2t\_A  
3u2z\_D  
3u3d\_A  
3u4a\_B  
3u4c\_A  
3u4j\_A  
3u4m\_A  
3u50\_C  
3u56\_A  
3u88\_B  
3u88\_C  
3u8v\_A  
3u95\_B  
3u9s\_L  
3ua3\_A  
3uan\_A

3ubl\_A  
3ubm\_B  
3ubo\_A  
3uc1\_A  
3uce\_C  
3ucz\_P  
3ue6\_F  
3ue9\_C  
3ued\_C  
3uee\_A  
3ueh\_A  
3uei\_B  
3uf6\_B  
3ugt\_C  
3ugx\_B  
3uh1\_A  
3uh4\_A  
3uhs\_A  
3ujh\_B  
3ujp\_B  
3ujz\_A  
3ulq\_A  
3um9\_A  
3umv\_A  
3unr\_A  
3uns\_A  
3unv\_A  
3unw\_A  
3uoi\_S  
3up1\_A  
3upl\_A  
3uq6\_A  
3urm\_A  
3urn\_A  
3urp\_A  
3usk\_C  
3usx\_B  
3usz\_A  
3ut0\_A  
3utf\_A  
3uue\_A  
3uum\_A  
3uve\_D  
3uw1\_A  
3uwk\_A  
3uww\_A  
3ux3\_B  
3uxi\_A  
3uxj\_A  
3uxy\_C  
3uy9\_D  
3uy9\_L  
3uyk\_A  
3uzx\_A

3v00\_C  
3v0c\_A  
3v0l\_A  
3v0p\_A  
3v17\_B  
3v17\_D  
3v1c\_A  
3v1h\_A  
3v34\_B  
3v3h\_B  
3v3n\_D  
3v65\_C  
3v65\_C  
3v6i\_B  
3v6o\_B  
3v8d\_A  
3v9l\_A  
3v9l\_B  
3v9o\_A  
3va8\_A  
3vay\_B  
3vb0\_D  
3vc2\_G  
3vdn\_B  
3ved\_B  
3ven\_A  
3vgk\_B  
3vgk\_D  
3vh7\_E  
3vh7\_E  
3vij\_A  
3vkc\_A  
3vkc\_B  
3vkd\_A  
3vll\_A  
3vlu\_A  
3vm5\_A  
3vmq\_A  
3vn4\_A  
3vni\_C  
3vnq\_A  
3vnz\_A  
3vof\_A  
3vol\_A  
3vov\_B  
3vp5\_A  
3vpb\_F  
3vpc\_B  
3vq2\_C  
3vqj\_A  
3vqr\_A  
3vr1\_D  
3vrg\_A  
3vse\_A

3vse\_B  
3vsh\_D  
3vsq\_A  
3vtf\_A  
3vtk\_A  
3vto\_Q  
3vur\_A  
3vv1\_A  
3vvf\_B  
3vvk\_F  
3vw9\_A  
3vwd\_A  
3vx3\_A  
3vyg\_L  
3vyl\_G  
3vym\_A  
3vyr\_B  
3vyw\_D  
3vzw\_X  
3w00\_B  
3w0f\_A  
3w0l\_B  
3w0o\_A  
3w15\_A  
3w1b\_A  
3w1o\_A  
3w1q\_A  
3w1q\_B  
3w1u\_A  
3w1x\_A  
3w20\_A  
3w2l\_B  
3w2w\_B  
3w2z\_A  
3w5j\_A  
3w5m\_A  
3w5n\_A  
3w5u\_E  
3w68\_B  
3w6s\_A  
3w6s\_A  
3w6z\_A  
3w79\_B  
3w82\_A  
3w87\_A  
3w8f\_A  
3w8w\_A  
3w9f\_A  
3w9k\_A  
3wad\_A  
3wag\_B  
3wak\_A  
3waq\_A  
3war\_A

3wbb\_C  
3wcp\_A  
3wcp\_D  
3wcu\_D  
3wcu\_E  
3wd6\_A  
3wdu\_A  
3wdv\_A  
3wec\_A  
3wew\_A  
3wf3\_A  
3wfw\_A  
3wgk\_B  
3wgu\_B  
3wgv\_E  
3wh7\_A  
3whc\_A  
3whd\_C  
3wip\_B  
3wip\_F  
3wky\_A  
3wl3\_C  
3wnw\_F  
3wok\_B  
3wqa\_B  
3wqg\_B  
3wqm\_A  
3wqz\_A  
3wr2\_C  
3wr4\_A  
3wr5\_A  
3wrb\_B  
3wre\_A  
3wro\_A  
3wry\_A  
3wry\_C  
3wsf\_E  
3wsi\_A  
3wsi\_B  
3wst\_J  
3wsw\_C  
3wv6\_A  
3wv9\_C  
3wve\_B  
3wvn\_A  
3ww1\_A  
3ww2\_A  
3ww3\_B  
3wwh\_A  
3wwj\_C  
3wwm\_A  
3wwo\_B  
3wwq\_L  
3wwt\_B

3wxb\_A  
3wxx\_G  
3wy0\_B  
3wy1\_A  
3wy2\_B  
3wyc\_B  
3wzn\_A  
3x0n\_A  
3x0y\_D  
3x0y\_F  
3x15\_D  
3x15\_J  
3x21\_H  
3x27\_D  
3x2f\_A  
3x2x\_B  
3x43\_A  
3x43\_B  
3zbn\_A  
3zbq\_A  
3zby\_B  
3zc0\_B  
3zc0\_C  
3zc0\_H  
3zc0\_K  
3zc1\_C  
3zc7\_A  
3zcn\_A  
3zcx\_A  
3ze3\_D  
3zec\_A  
3zet\_B  
3z fj\_A  
3zfk\_A  
3zg1\_B  
3zg3\_A  
3zgl\_A  
3gz\_D  
3gz\_D  
3zi8\_A  
3zi8\_A  
3zid\_A  
3zj0\_A  
3zja\_A  
3zjh\_B  
3zjl\_A  
3zkb\_H  
3zl8\_A  
3zlm\_A  
3zm8\_A  
3zme\_B  
3zmk\_B  
3zmr\_A  
3zmu\_A



3znv\_A  
3zoe\_B  
3zof\_B  
3zog\_A  
3zow\_A  
3zow\_F  
3zow\_G  
3zox\_B  
3zp4\_B  
3zp7\_B  
3zq5\_A  
3zqs\_B  
3zqx\_A  
3zr0\_A  
3zr4\_B  
3zrp\_A  
3zrr\_B  
3zs1\_D  
3zs7\_A  
3zsw\_B  
3zth\_A  
3zul\_B  
3zu2\_A  
3zuk\_A  
3zv5\_A  
3zvi\_B  
3zv1\_A  
3zv1\_A  
3zwa\_A  
3zwa\_B  
3zwm\_C  
3zwm\_D  
3zwo\_B  
3zx4\_B  
3zxo\_B  
3zxu\_A  
3zxu\_D  
3zyf\_B  
3zyo\_A  
3zyy\_Y  
3zzn\_D  
4a0g\_A  
4a0z\_A  
4a1o\_A  
4a1o\_B  
4a2a\_B  
4a2b\_A  
4a3q\_B  
4a42\_A  
4a45\_A  
4a46\_C  
4a4a\_A  
4a4e\_A  
4a4f\_A

4a4k\_A  
4a4k\_G  
4a61\_A  
4a62\_B  
4a69\_B  
4a69\_C  
4a6j\_F  
4a6o\_A  
4a6s\_D  
4a6t\_B  
4a8h\_B  
4a99\_A  
4ab7\_H  
4aba\_A  
4abo\_D  
4aci\_B  
4adc\_A  
4adj\_C  
4aea\_A  
4afo\_A  
4af1\_A  
4afx\_A  
4afy\_B  
4ag3\_A  
4ag5\_C  
4agl\_A  
4aia\_E  
4aip\_A  
4aiw\_A  
4ajx\_L  
4ak7\_B  
4alb\_A  
4all\_B  
4am7\_B  
4am8\_B  
4amv\_A  
4ang\_B  
4ao5\_E  
4ao5\_F  
4ap5\_B  
4apm\_A  
4aq0\_A  
4aq6\_D  
4aqn\_B  
4aqq\_A  
4arc\_A  
4are\_A  
4arq\_B  
4ary\_B  
4arz\_B  
4as1\_B  
4as2\_C  
4as7\_A  
4ask\_A

4aty\_A  
4au7\_B  
4aub\_B  
4av0\_A  
4avi\_A  
4avu\_B  
4awd\_A  
4axd\_A  
4axl\_A  
4axn\_B  
4axn\_B  
4axo\_B  
4axv\_A  
4ayb\_C  
4ayb\_C  
4ayg\_A  
4ayl\_A  
4azu\_D  
4b02\_C  
4b0n\_A  
4b17\_A  
4b1l\_A  
4b1u\_M  
4b1u\_M  
4b3j\_A  
4b3s\_B  
4b3s\_E  
4b43\_A  
4b44\_A  
4b46\_A  
4b4o\_A  
4b5q\_B  
4b5w\_B  
4b60\_B  
4b6z\_B  
4b6z\_B  
4b8n\_D  
4b96\_A  
4b98\_C  
4b98\_D  
4ba0\_A  
4ba9\_C  
4baa\_C  
4bb2\_B  
4bb5\_D  
4bb9\_A  
4bbo\_B  
4bbr\_M  
4bc2\_A  
4bca\_A  
4bcx\_A  
4ber\_A  
4bf4\_I  
4bf4\_K

4bf5\_A  
4bfa\_A  
4bfi\_A  
4bhq\_A  
4bif\_A  
4bif\_B  
4bif\_B  
4bin\_A  
4bio\_A  
4biu\_F  
4biv\_B  
4biw\_A  
4biy\_C  
4biz\_C  
4bj8\_O  
4bja\_A  
4bjv\_A  
4bjz\_A  
4bkm\_C  
4bkt\_I  
4bl6\_C  
4blb\_A  
4blv\_A  
4bmb\_A  
4bmp\_B  
4bmq\_A  
4bmv\_C  
4bn8\_A  
4bo0\_B  
4bol\_A  
4bos\_B  
4bpm\_A  
4bpz\_B  
4bq0\_B  
4bql\_A  
4bqn\_A  
4bqo\_A  
4br5\_A  
4br6\_A  
4br7\_A  
4bre\_A  
4brh\_A  
4brs\_A  
4bs1\_A  
4bt6\_A  
4btj\_B  
4buv\_A  
4bv1\_D  
4bvb\_A  
4bwr\_A  
4bww\_C  
4bxc\_B  
4by6\_A  
4bz8\_B

4bz9\_A  
4bzi\_E  
4bzi\_G  
4c0c\_A  
4c0j\_A  
4c0n\_A  
4c1l\_B  
4c1n\_I  
4c1n\_K  
4c1r\_A  
4c1r\_B  
4c1y\_A  
4c20\_B  
4c2a\_A  
4c2l\_A  
4c2m\_B  
4c2v\_B  
4c2w\_A  
4c2w\_B  
4c3b\_D  
4c3b\_F  
4c3b\_H  
4c3b\_M  
4c3e\_O  
4c3i\_L  
4c3x\_D  
4c3x\_H  
4c3y\_F  
4c5k\_A  
4c5k\_D  
4c5l\_B  
4c79\_A  
4c7a\_A  
4c8i\_B  
4cae\_A  
4caj\_D  
4cat\_B  
4cc1\_B  
4cc7\_K  
4cc9\_B  
4ccv\_A  
4ccz\_A  
4cd6\_A  
4cdp\_A  
4ce4\_5  
4cff\_C  
4cfz\_A  
4cgg\_B  
4cht\_A  
4ci7\_A  
4cin\_A  
4cj8\_H  
4cjk\_A  
4ck7\_B

4ckc\_D  
4clk\_A  
4clo\_D  
4cm1\_A  
4cmi\_A  
4cmi\_B  
4cmn\_A  
4coq\_B  
4cov\_A  
4cox\_D  
4coy\_A  
4cpa\_B  
4cpa\_I  
4cpo\_A  
4cq5\_D  
4cqb\_A  
4cr8\_D  
4crn\_P  
4crv\_B  
4cs7\_E  
4cs8\_B  
4csm\_B  
4ct4\_D  
4cta\_A  
4cth\_A  
4cu9\_B  
4cub\_A  
4cub\_B  
4cug\_A  
4cv1\_B  
4cvh\_A  
4cvo\_A  
4cvq\_A  
4cvu\_A  
4cw0\_A  
4cxs\_A  
4cy8\_A  
4cyb\_J  
4cyk\_A  
4cym\_A  
4cys\_B  
4czm\_A  
4czy\_B  
4d05\_A  
4d0l\_D  
4d0z\_E  
4d1y\_B  
4d25\_A  
4d2i\_A  
4d3d\_A  
4d3l\_B  
4d3u\_A  
4d49\_E  
4d4g\_A

4d4o\_A  
4d65\_B  
4d6u\_G  
4d6x\_B  
4d79\_C  
4d7e\_A  
4d7u\_A  
4d82\_A  
4d92\_D  
4d9q\_B  
4db3\_A  
4dcm\_A  
4ddr\_A  
4deu\_B  
4df0\_B  
4df1\_A  
4df3\_B  
4dfd\_A  
4dg8\_A  
4dik\_A  
4dit\_A  
4djd\_B  
4dkd\_A  
4dky\_B  
4dmg\_A  
4dn1\_A  
4dn2\_A  
4dn5\_A  
4dnj\_A  
4dnm\_A  
4dnn\_B  
4dnr\_A  
4dnz\_C  
4doz\_A  
4dpg\_J  
4dpl\_A  
4dq6\_B  
4dqk\_A  
4dr4\_O  
4dr6\_H  
4dr7\_J  
4dr8\_A  
4dt9\_B  
4dty\_A  
4dun\_A  
4dur\_A  
4duy\_F  
4duz\_J  
4dv0\_C  
4dv1\_I  
4dv2\_F  
4dve\_B  
4dwd\_B  
4dwj\_B

4dwo\_A  
4dxw\_B  
4dy7\_F  
4dz6\_D  
4dzi\_A  
4dzt\_A  
4e0c\_A  
4e0f\_A  
4e0i\_A  
4e0u\_B  
4e13\_A  
4e1b\_A  
4e2g\_C  
4e2q\_C  
4e3w\_B  
4e45\_D  
4e45\_J  
4e4s\_F  
4e51\_A  
4e55\_B  
4e5m\_B  
4e5p\_A  
4e5v\_A  
4e5y\_A  
4e6k\_G  
4e7e\_A  
4e7e\_D  
4e7u\_D  
4e7v\_B  
4e7w\_A  
4e80\_C  
4e84\_A  
4e8c\_A  
4ean\_B  
4eay\_C  
4eb6\_D  
4ebu\_A  
4ec0\_B  
4ec5\_B  
4ece\_E  
4edy\_B  
4ee3\_C  
4eei\_B  
4een\_A  
4ef8\_B  
4efz\_A  
4eg1\_B  
4eg9\_A  
4eg9\_A  
4egp\_A  
4egs\_A  
4ehc\_A  
4ehu\_B  
4ei5\_A



4ei9\_A  
4eia\_A  
4eis\_B  
4eiw\_E  
4ej0\_F  
4ej6\_A  
4ejx\_D  
4ek1\_A  
4elb\_B  
4elb\_B  
4elb\_H  
4elj\_A  
4elr\_A  
4emj\_A  
4emy\_A  
4enl\_A  
4enp\_B  
4eol\_A  
4eo3\_A  
4eo7\_A  
4eoi\_C  
4ep4\_B  
4eq5\_A  
4eq9\_A  
4eqx\_B  
4erm\_E  
4erp\_D  
4erp\_E  
4esn\_A  
4eso\_A  
4eu5\_A  
4euk\_A  
4euo\_A  
4ev0\_D  
4ev2\_A  
4evi\_A  
4evw\_B  
4ew7\_A  
4ewg\_A  
4ewl\_A  
4ex6\_A  
4exa\_B  
4exa\_F  
4exl\_C  
4exo\_A  
4exx\_B  
4ey0\_D  
4eyk\_A  
4f07\_C  
4f07\_G  
4f07\_J  
4f0p\_B  
4f0q\_A  
4flc\_B

4f1m\_A  
4f1z\_A  
4f2l\_A  
4f2n\_L  
4f30\_A  
4f53\_B  
4f5w\_A  
4f5x\_F  
4f5x\_L  
4f5y\_A  
4f5y\_B  
4f66\_B  
4f7w\_A  
4f86\_A  
4f86\_C  
4f86\_D  
4f8b\_C  
4f8e\_A  
4f8e\_B  
4f8p\_B  
4f96\_A  
4fa1\_E  
4fai\_A  
4fai\_B  
4fak\_A  
4fba\_A  
4fbb\_B  
4fbk\_A  
4fd2\_D  
4fdg\_A  
4fdi\_A  
4fdi\_B  
4fe7\_A  
4ffd\_A  
4ffd\_A  
4ffk\_A  
4fg9\_B  
4fha\_A  
4fhc\_A  
4fhg\_A  
4fht\_B  
4fi3\_C  
4fid\_A  
4fig\_A  
4fir\_A  
4fir\_D  
4fix\_B  
4fk1\_B  
4fl2\_A  
4flm\_B  
4fm4\_K  
4fma\_B  
4fmo\_A  
4fms\_A

4fmw\_A  
4fn4\_B  
4fnd\_A  
4fo9\_A  
4fp9\_C  
4fpp\_B  
4fqg\_B  
4fr2\_A  
4ft4\_B  
4ft8\_B  
4fu0\_A  
4fva\_C  
4fva\_C  
4fyp\_A  
4fzb\_C  
4fzb\_E  
4fzm\_A  
4g01\_A  
4g0y\_A  
4g10\_A  
4g19\_A  
4gle\_B  
4g2s\_B  
4g2t\_A  
4g33\_A  
4g3m\_A  
4g41\_B  
4g4y\_F  
4g5h\_A  
4g5r\_D  
4g5s\_A  
4g67\_A  
4g6u\_A  
4g6z\_A  
4g75\_A  
4g8a\_D  
4g8j\_B  
4g97\_A  
4g9g\_A  
4g9k\_A  
4g9n\_B  
4ga6\_A  
4gbc\_B  
4gbz\_A  
4gc9\_A  
4gcy\_A  
4gcz\_B  
4gd3\_A  
4gd3\_B  
4gd9\_B  
4gdi\_A  
4gdp\_B  
4gdz\_A  
4gel\_A

4gej\_I  
4gel\_B  
4gem\_B  
4gey\_A  
4gf0\_A  
4gf5\_G  
4gf5\_M  
4gf5\_P  
4gfj\_A  
4gg2\_B  
4ggj\_A  
4ggk\_A  
4ggz\_D  
4gh1\_A  
4ghg\_A  
4ghl\_A  
4ghm\_A  
4gi2\_B  
4gi5\_B  
4gi7\_C  
4gib\_A  
4gil\_B  
4gir\_B  
4gis\_A  
4gis\_B  
4gjz\_A  
4gk9\_A  
4gkb\_C  
4gko\_L  
4gl7\_A  
4gll\_A  
4gme\_C  
4gmg\_A  
4gn0\_C  
4gna\_B  
4gnc\_A  
4gox\_A  
4gpc\_A  
4gpu\_A  
4gqk\_A  
4gqy\_A  
4gr1\_A  
4grf\_A  
4grh\_A  
4gsf\_B  
4gsl\_A  
4gua\_B  
4guh\_B  
4gun\_C  
4gun\_J  
4gun\_P  
4gux\_B  
4gvo\_A  
4gvx\_B

4gw9\_A  
4gw9\_C  
4gw9\_D  
4gwb\_A  
4gwm\_A  
4gxw\_A  
4gy5\_C  
4gza\_H  
4gzt\_B  
4gzt\_C  
4h03\_A  
4h0f\_A  
4h0f\_B  
4h0j\_A  
4h0j\_D  
4h0l\_G  
4h0m\_C  
4h18\_D  
4h19\_P  
4h1v\_A  
4h23\_A  
4h2d\_A  
4h2l\_A  
4h2u\_D  
4h2w\_C  
4h3s\_A  
4h3z\_B  
4h4e\_B  
4h5f\_A  
4h6d\_B  
4h6q\_A  
4h7l\_B  
4h83\_F  
4h8n\_A  
4h97\_B  
4h9k\_A  
4ha3\_A  
4ha9\_A  
4hac\_A  
4hai\_A  
4han\_A  
4haw\_C  
4hb9\_A  
4hbg\_A  
4hcf\_B  
4hd4\_B  
4hey\_A  
4hg0\_A  
4hg5\_A  
4hg6\_A  
4hgn\_B  
4hgn\_C  
4hgq\_D  
4hgx\_B

4hh1\_A  
4hh4\_C  
4hi0\_E  
4hi1\_A  
4hia\_A  
4hj6\_B  
4hji\_A  
4hju\_C  
4hk5\_A  
4hki\_A  
4hlm\_B  
4hlu\_B  
4hlu\_C  
4hnb\_A  
4hnh\_A  
4hnn\_F  
4hnz\_E  
4hnz\_L  
4hog\_A  
4hot\_A  
4how\_A  
4hpb\_A  
4hpg\_A  
4hql\_A  
4hqm\_B  
4hgo\_A  
4hr3\_A  
4hrq\_B  
4hrt\_F  
4hs4\_H  
4hs9\_A  
4hss\_A  
4hsw\_B  
4hte\_A  
4htf\_A  
4huz\_A  
4hv4\_A  
4hvj\_B  
4hwv\_A  
4hx2\_B  
4hx3\_I  
4hx3\_I  
4hx5\_B  
4hy4\_B  
4hyj\_A  
4hz2\_B  
4i02\_C  
4i14\_A  
4i25\_D  
4i2r\_A  
4i3g\_B  
4i3m\_A  
4i3x\_A  
4i42\_F

4i45\_A  
4i4i\_A  
4i58\_D  
4i5e\_A  
4i5q\_A  
4i6v\_A  
4i7f\_A  
4i8v\_B  
4i94\_A  
4i9r\_A  
4i9x\_B  
4iao\_B  
4iau\_A  
4ib2\_A  
4ibo\_D  
4id4\_A  
4idc\_A  
4idg\_B  
4ie6\_A  
4iee\_A  
4ieg\_C  
4iei\_A  
4iej\_A  
4iej\_A  
4ifh\_A  
4ifo\_B  
4ifr\_B  
4ifu\_A  
4igm\_E  
4ih3\_B  
4ihb\_E  
4ihh\_I  
4ii1\_B  
4ii1\_B  
4iil\_A  
4ijr\_A  
4iju\_B  
4ijx\_A  
4il3\_B  
4ild\_B  
4ild\_B  
4ilo\_A  
4ilv\_B  
4im7\_A  
4imp\_A  
4imr\_A  
4ine\_A  
4inf\_B  
4inf\_C  
4inj\_A  
4io7\_B  
4iol\_A  
4ip2\_C  
4ip2\_C

4ipj\_A  
4ips\_A  
4iqg\_D  
4iqy\_A  
4ir7\_A  
4ir7\_A  
4is3\_C  
4isk\_B  
4isk\_B  
4itb\_A  
4itk\_A  
4itm\_A  
4itx\_B  
4itx\_B  
4iu3\_A  
4ium\_A  
4iuu\_B  
4iuw\_A  
4iv6\_B  
4iv9\_B  
4ivv\_A  
4iw3\_A  
4iw9\_B  
4ix0\_A  
4ix5\_B  
4ix6\_B  
4ixj\_B  
4ixo\_B  
4ixq\_j  
4ixr\_E  
4ixr\_m  
4iyb\_A  
4iz6\_A  
4iz9\_A  
4izk\_B  
4j0i\_B  
4j14\_A  
4j1q\_A  
4j1w\_A  
4j1x\_C  
4j20\_A  
4j2k\_A  
4j34\_B  
4j3f\_D  
4j48\_C  
4j5w\_D  
4j6g\_C  
4j6o\_A  
4j6r\_G  
4j6x\_A  
4j6x\_D  
4j8l\_A  
4j90\_A  
4j96\_B



4jaf\_B  
4jag\_A  
4jap\_C  
4jb0\_A  
4jbb\_A  
4jbh\_A  
4jd1\_B  
4jdp\_B  
4je5\_A  
4je7\_A  
4jed\_A  
4jem\_A  
4jet\_I  
4jf7\_B  
4jfa\_B  
4jfn\_A  
4jgi\_B  
4jgo\_B  
4jgt\_A  
4jgu\_A  
4jgu\_B  
4jhd\_E  
4jhh\_A  
4ji0\_E  
4ji3\_H  
4ji4\_C  
4jiu\_A  
4jiw\_I  
4jiw\_L  
4jix\_A  
4jj2\_C  
4jkr\_K  
4jmg\_A  
4jna\_A  
4jnx\_D  
4jo5\_A  
4jou\_A  
4jpc\_A  
4jph\_A  
4jqj\_L  
4jqo\_B  
4jrf\_A  
4js2\_A  
4jsd\_A  
4jtq\_A  
4jvt\_A  
4jwf\_B  
4jwj\_B  
4jwt\_A  
4jx4\_C  
4jx9\_A  
4jy3\_A  
4jyb\_A  
4jyk\_A

4jys\_A  
4jyu\_H  
4jyu\_H  
4jyv\_H  
4jyy\_A  
4jyz\_A  
4jzg\_A  
4jzt\_A  
4k03\_B  
4k08\_A  
4k0b\_A  
4k0g\_A  
4k0j\_A  
4k17\_C  
4k1i\_B  
4k1k\_A  
4k24\_U  
4k2h\_D  
4k2p\_B  
4k30\_A  
4k5r\_A  
4k5r\_B  
4k5u\_B  
4k6b\_A  
4k6b\_B  
4k6f\_B  
4k6f\_D  
4k6n\_A  
4k6u\_B  
4k7i\_A  
4ka7\_A  
4kbz\_A  
4kcf\_A  
4kdr\_A  
4kdx\_B  
4kdy\_A  
4kem\_A  
4ket\_D  
4kfl\_B  
4kfr\_B  
4kfv\_A  
4kg0\_A  
4kgi\_C  
4kgn\_C  
4kgq\_C  
4kh6\_B  
4kh7\_B  
4kh9\_A  
4kho\_A  
4ki0\_A  
4kjy\_A  
4kjz\_C  
4kkd\_B  
4kkj\_A

4kkv\_A  
4kky\_X  
4kla\_A  
4km6\_A  
4kmg\_A  
4kmr\_B  
4kmv\_B  
4kna\_A  
4kng\_B  
4knh\_B  
4knl\_B  
4knl\_C  
4knw\_B  
4ko6\_C  
4koa\_A  
4kob\_B  
4kob\_C  
4koo\_A  
4kp1\_A  
4kp4\_A  
4kp8\_D  
4kpn\_G  
4kpp\_A  
4kpp\_A  
4kpu\_B  
4kq6\_C  
4kq6\_I  
4kqa\_B  
4kqq\_A  
4kr5\_B  
4krq\_B  
4kry\_A  
4ksa\_A  
4ktp\_A  
4ktr\_A  
4ktz\_B  
4ku0\_D  
4ku2\_B  
4kub\_A  
4kv0\_A  
4kvb\_M  
4kvo\_G  
4kvp\_B  
4kwa\_A  
4kwc\_A  
4kwe\_C  
4kwh\_B  
4kw1\_A  
4kws\_F  
4kx4\_A  
4kx6\_D  
4kxb\_A  
4kxf\_K  
4kxy\_B

4ky8\_E  
410e\_A  
410p\_B  
410p\_B  
411k\_A  
412a\_A  
4139\_A  
413t\_A  
4144\_A  
4154\_A  
416a\_A  
416d\_B  
416d\_C  
416t\_A  
4179\_A  
4180\_B  
4182\_B  
418h\_B  
418n\_A  
418v\_A  
4197\_A  
419p\_B  
4laf\_A  
4lag\_X  
4lc5\_A  
4lc8\_A  
4lc8\_B  
4lec\_A  
4leh\_A  
4lej\_A  
4lem\_F  
4lep\_A  
4lev\_A  
4lf2\_A  
4lf2\_B  
4lf5\_N  
4lf8\_G  
4lf9\_E  
4lfb\_L  
4lg1\_A  
4lgd\_B  
4lh8\_A  
4lh8\_A  
4lhy\_A  
4li4\_A  
4lim\_A  
4lin\_G  
4lit\_A  
4lji\_A  
4lk2\_A  
4lkt\_D  
4lmx\_C  
4lna\_A  
4lo1\_A

4lo9\_B  
4los\_A  
4lp7\_D  
4lpa\_A  
4lpc\_B  
4lqf\_A  
4lqx\_B  
4lrh\_D  
4lrl\_C  
4lsb\_B  
4lsm\_A  
4lta\_A  
4ltp\_B  
4lv5\_A  
4lv5\_B  
4lwp\_B  
4lxc\_D  
4lxo\_B  
4ly4\_D  
4lyk\_D  
4lzb\_F  
4lzd\_A  
4lzz\_I  
4lzz\_U  
4m0l\_B  
4m0j\_B  
4m0j\_B  
4m0n\_A  
4m1e\_F  
4m1p\_A  
4m1t\_C  
4m20\_A  
4m2g\_B  
4m2j\_A  
4m4j\_D  
4m51\_A  
4m52\_C  
4m56\_B  
4m58\_A  
4m5p\_A  
4m6q\_A  
4m6r\_C  
4m6t\_A  
4m7e\_A  
4m7u\_A  
4m7y\_B  
4m83\_A  
4m8l\_D  
4ma3\_A  
4mae\_A  
4mai\_A  
4mar\_A  
4mb2\_B  
4mb7\_A

4mbx\_A  
4mby\_I  
4mc5\_C  
4mc7\_B  
4md9\_I  
4mdp\_A  
4mdt\_B  
4mdz\_B  
4me3\_A  
4mf9\_A  
4mgk\_E  
4mgq\_A  
4mhq\_A  
4mhu\_A  
4mhv\_A  
4mih\_D  
4mih\_E  
4miv\_A  
4mj7\_A  
4mjl\_A  
4mk3\_A  
4ml9\_A  
4mlc\_A  
4mle\_A  
4mlr\_F  
4mmo\_A  
4mn5\_A  
4mn6\_B  
4mnd\_A  
4mnr\_A  
4mo1\_A  
4mo5\_D  
4mo7\_A  
4mok\_C  
4moq\_B  
4mor\_A  
4mp8\_A  
4mpg\_B  
4mpy\_H  
4mpz\_A  
4mqk\_G  
4mqy\_A  
4mra\_A  
4mrb\_B  
4msu\_A  
4msx\_A  
4msx\_A  
4mtl\_B  
4mtu\_A  
4muq\_A  
4mv2\_B  
4mv4\_A  
4mxe\_A  
4my0\_F

4myh\_B  
4myo\_A  
4mys\_B  
4myx\_C  
4myx\_E  
4mz0\_A  
4mza\_B  
4mzf\_B  
4mzg\_B  
4n09\_C  
4n0b\_A  
4n0b\_B  
4n0g\_C  
4n0i\_A  
4n0l\_A  
4n1i\_A  
4n27\_B  
4n35\_A  
4n3v\_B  
4n48\_B  
4n4b\_A  
4n4g\_A  
4n4r\_C  
4n4t\_A  
4n54\_B  
4n54\_D  
4n58\_B  
4n5h\_X  
4n7b\_A  
4n7n\_E  
4n7p\_F  
4n7s\_B  
4n82\_B  
4n8f\_A  
4n8j\_D  
4n90\_A  
4n9f\_S  
4n9i\_B  
4nbb\_D  
4nbb\_E  
4nbd\_E  
4nbg\_E  
4nc7\_B  
4nc8\_B  
4ndz\_F  
4nea\_A  
4nec\_B  
4nef\_A  
4nei\_A  
4neu\_A  
4nfl\_G  
4nfu\_A  
4ng3\_C  
4nga\_H

4nge\_A  
4nh4\_A  
4nhb\_A  
4nhb\_B  
4nhe\_C  
4nhf\_F  
4nhw\_D  
4nhy\_A  
4nhy\_B  
4nhz\_H  
4nhz\_P  
4ni8\_F  
4nia\_F  
4nj4\_A  
4nje\_A  
4njm\_A  
4nk2\_A  
4nkb\_B  
4nkt\_A  
4nkx\_C  
4nl5\_A  
4nmd\_B  
4nmk\_E  
4nmy\_A  
4nn3\_A  
4nna\_A  
4nnw\_G  
4nnw\_K  
4no4\_F  
4no6\_H  
4no8\_K  
4nob\_A  
4np7\_A  
4np9\_A  
4npp\_A  
4nsq\_B  
4nsq\_C  
4nt5\_A  
4ntc\_A  
4ntk\_A  
4ntn\_A  
4ntn\_B  
4nu0\_B  
4nu6\_B  
4nu7\_C  
4nun\_A  
4nun\_A  
4nv0\_B  
4nv2\_A  
4nvr\_A  
4nvr\_B  
4nwo\_A  
4nxb\_A  
4nxv\_A



4nxv\_C  
4nyq\_A  
4nz2\_B  
4nz6\_B  
4nzd\_C  
4nzf\_D  
4nzg\_B  
4o01\_D  
4o0l\_B  
4o1e\_A  
4o1m\_A  
4o1m\_E  
4o2i\_A  
4o2w\_B  
4o30\_A  
4o33\_A  
4o4o\_A  
4o4p\_A  
4o4s\_A  
4o5m\_A  
4o5q\_A  
4o65\_A  
4o6o\_D  
4o6p\_B  
4o6z\_A  
4o7i\_A  
4o8c\_B  
4oa5\_E  
4obb\_A  
4obi\_A  
4obu\_F  
4obw\_C  
4oci\_A  
4odo\_C  
4oec\_A  
4oef\_A  
4ofc\_C  
4ofg\_A  
4ofo\_D  
4ofq\_A  
4ofz\_A  
4ogk\_E  
4ogl\_C  
4ogl\_E  
4ohf\_A  
4ohf\_B  
4ohn\_A  
4oht\_A  
4ohy\_A  
4oic\_A  
4oiw\_B  
4oiw\_E  
4ojj\_C  
4ojm\_X

4ojo\_A  
4oju\_C  
4ojy\_A  
4ojy\_A  
4ojy\_B  
4ojz\_A  
4okd\_A  
4oko\_A  
4oku\_B  
4ol9\_A  
4olk\_B  
4om8\_B  
4on1\_A  
4onr\_A  
4onv\_B  
4onx\_A  
4oo7\_B  
4ooj\_C  
4oow\_A  
4ooz\_A  
4op0\_A  
4oq9\_E  
4oq9\_K  
4oro\_A  
4oro\_B  
4osd\_G  
4oul\_E  
4ov1\_A  
4ov9\_A  
4ovd\_A  
4ove\_A  
4ovr\_B  
4ovt\_B  
4ovy\_A  
4owd\_A  
4owk\_E  
4owz\_B  
4ox3\_A  
4oxx\_A  
4oy2\_A  
4oy7\_A  
4oy7\_A  
4oyz\_A  
4oz1\_A  
4oz6\_A  
4ozq\_B  
4ozv\_A  
4p0d\_A  
4p10\_A  
4p1g\_A  
4p36\_A  
4p3l\_A  
4p42\_A  
4p4s\_B

4p4t\_A  
4p57\_B  
4p5b\_B  
4p5e\_B  
4p5f\_A  
4p5w\_A  
4p5w\_A  
4p6v\_B  
4p6v\_D  
4p6v\_E  
4p77\_A  
4p7x\_A  
4p86\_A  
4p8q\_A  
4p8y\_B  
4p9e\_A  
4pa5\_A  
4pac\_A  
4paf\_A  
4pag\_A  
4pao\_A  
4paw\_A  
4pbg\_A  
4pbu\_j  
4pbu\_O  
4pc0\_B  
4pc2\_B  
4pc6\_B  
4pdd\_A  
4pde\_A  
4pdn\_A  
4pdy\_A  
4pee\_C  
4pem\_A  
4pew\_B  
4pfu\_B  
4pfx\_A  
4pg3\_C  
4pg7\_A  
4pgl\_C  
4pgp\_D  
4phc\_A  
4phg\_A  
4phh\_C  
4pi0\_E  
4pie\_A  
4pii\_A  
4pj2\_B  
4pk5\_A  
4pks\_A  
4pkv\_A  
4pl0\_B  
4pl9\_A  
4plv\_D

4ply\_C  
4pmw\_A  
4pmx\_A  
4pne\_B  
4pnl\_D  
4pof\_F  
4poq\_H  
4por\_A  
4pot\_F  
4pp6\_A  
4pq6\_A  
4pqg\_A  
4pqh\_A  
4pqw\_A  
4pr3\_A  
4pr3\_B  
4ps2\_A  
4psw\_A  
4psw\_B  
4ptn\_A  
4ptz\_D  
4pv6\_F  
4pv6\_G  
4pv6\_I  
4pw3\_C  
4pw9\_B  
4pwa\_D  
4pwb\_A  
4pwg\_A  
4pwt\_C  
4pwy\_A  
4px3\_B  
4px5\_B  
4pxa\_A  
4pxg\_A  
4pxo\_A  
4pxv\_D  
4pxz\_A  
4pyg\_A  
4pyh\_A  
4pyn\_A  
4pyr\_A  
4pys\_A  
4pys\_B  
4pz1\_A  
4pz6\_B  
4pzd\_F  
4pze\_H  
4pzh\_A  
4pzl\_A  
4pzs\_A  
4q0k\_A  
4q0q\_A  
4q19\_B

4q1v\_A  
4q2b\_C  
4q2g\_B  
4q2h\_A  
4q2t\_A  
4q33\_F  
4q4a\_A  
4q4k\_A  
4q4k\_B  
4q51\_B  
4q52\_A  
4q57\_B  
4q5h\_A  
4q93\_A  
4q9n\_E  
4qai\_A  
4qan\_B  
4qat\_B  
4qbl\_E  
4qbo\_A  
4qdk\_A  
4qdp\_A  
4qe6\_A  
4qed\_B  
4qei\_A  
4qek\_A  
4qfh\_B  
4qfs\_C  
4qfu\_C  
4qfu\_G  
4qgp\_A  
4qgp\_A  
4qgr\_B  
4qhi\_B  
4qht\_B  
4qhy\_A  
4qhy\_A  
4qhz\_B  
4qid\_A  
4qim\_A  
4qiq\_A  
4qiz\_B  
4qj0\_B  
4qjb\_A  
4qjb\_B  
4qkf\_B  
4qkf\_B  
4qkr\_A  
4qlq\_G  
4qlq\_K  
4qlx\_A  
4qly\_A  
4qn1\_A  
4qn2\_E

4qn3\_A  
4qn6\_A  
4qna\_A  
4qnl\_A  
4qod\_B  
4qoz\_C  
4qp2\_A  
4qpd\_A  
4qppj\_B  
4qppj\_D  
4qqf\_A  
4qra\_A  
4qrd\_A  
4qrh\_B  
4qrk\_A  
4qrn\_A  
4qro\_E  
4qry\_A  
4qsv\_A  
4qtq\_A  
4qts\_C  
4qtu\_B  
4qu3\_A  
4qu6\_A  
4quv\_A  
4qux\_K  
4quy\_G  
4qv5\_G  
4qv5\_H  
4qv8\_I  
4qv8\_Y  
4qve\_B  
4qvl\_I  
4qvl\_J  
4qvn\_J  
4qvt\_D  
4qvu\_A  
4qvv\_G  
4qw0\_J  
4qw6\_N  
4qw7\_K  
4qw7\_Z  
4qwu\_G  
4qz0\_G  
4qzw\_G  
4qzz\_G  
4r0a\_A  
4r0o\_B  
4r0o\_D  
4r0t\_B  
4r11\_F  
4r12\_A  
4r12\_A  
4r18\_Z

4r1d\_A  
4r1m\_C  
4r1p\_F  
4r20\_A  
4r29\_B  
4r2b\_B  
4r2m\_A  
4r38\_B  
4r39\_A  
4r4u\_A  
4r51\_A  
4r51\_B  
4r57\_A  
4r57\_F  
4r6g\_A  
4r70\_A  
4r78\_A  
4r7o\_C  
4r7t\_A  
4r7w\_E  
4r81\_B  
4r83\_D  
4r84\_A  
4r88\_D  
4r8d\_A  
4r94\_A  
4rad\_H  
4rb4\_E  
4rck\_A  
4rda\_A  
4rdh\_A  
4rdi\_B  
4rdr\_A  
4rdw\_A  
4rdz\_B  
4rek\_A  
4rep\_A  
4ret\_G  
4rfq\_A  
4rfu\_B  
4rfu\_B  
4rg1\_A  
4rg8\_A  
4rgb\_A  
4rgw\_A  
4rhh\_A  
4rhm\_A  
4rhz\_A  
4rhz\_B  
4ri1\_B  
4ri2\_B  
4ri6\_A  
4ri7\_B  
4rih\_B

4rii\_B  
4riy\_A  
4rjy\_D  
4rk0\_D  
4rk4\_A  
4rk6\_A  
4rkc\_B  
4rkk\_A  
4rkq\_A  
4rks\_A  
4rks\_B  
4rl3\_A  
4rl6\_A  
4rla\_B  
4rld\_C  
4rld\_C  
4rle\_A  
4rlu\_A  
4rmo\_A  
4rn3\_A  
4rn7\_A  
4rnu\_C  
4rnx\_B  
4rny\_A  
4rot\_A  
4rqf\_B  
4rqi\_D  
4rqn\_A  
4rqo\_A  
4rr2\_C  
4rrf\_C  
4rrs\_A  
4rs2\_B  
4rsl\_A  
4rso\_A  
4rt5\_A  
4rtz\_A  
4ru1\_A  
4ru1\_B  
4ru4\_F  
4rud\_B  
4ruq\_B  
4ruw\_A  
4ruz\_A  
4rvu\_A  
4rvy\_O  
4rwg\_B  
4rwk\_A  
4rxt\_A  
4rxu\_A  
4rxz\_B  
4ry9\_B  
4rya\_A  
4ryt\_A



4rz3\_B  
4rzx\_A  
4s17\_B  
4s1m\_A  
4s1m\_A  
4s23\_A  
4s29\_A  
4s2a\_A  
4s2u\_A  
4s37\_H  
4sdh\_A  
4sgb\_E  
4tk5\_B  
4tkf\_D  
4tko\_B  
4tkq\_A  
4tkr\_B  
4tlb\_E  
4tlc\_E  
4tlf\_D  
4tma\_B  
4tmv\_B  
4tn1\_A  
4tnd\_A  
4tnh\_x  
4tnj\_k  
4tnj\_V  
4tnk\_E  
4tnk\_L  
4tnu\_A  
4to9\_J  
4to9\_K  
4tod\_H  
4tof\_A  
4toi\_A  
4tor\_A  
4tpg\_A  
4tqg\_A  
4tr1\_A  
4tri\_A  
4ts2\_X  
4ts5\_B  
4tsd\_B  
4tss\_A  
4tv6\_A  
4twb\_E  
4twb\_F  
4twk\_A  
4twk\_A  
4tx3\_A  
4tx9\_A  
4txd\_A  
4tyd\_K  
4tyv\_B

4u01\_E  
4u0w\_A  
4u1q\_D  
4u3e\_A  
4u3e\_A  
4u49\_B  
4u49\_B  
4u4t\_A  
4u4t\_A  
4u4x\_A  
4u5p\_A  
4u63\_A  
4u6i\_C  
4u6x\_B  
4u75\_A  
4u7k\_D  
4u7w\_B  
4u82\_A  
4u8h\_A  
4u8h\_D  
4u8u\_I  
4u8u\_M  
4u8u\_o  
4u8u\_Z  
4u9w\_B  
4ua3\_A  
4uah\_C  
4uat\_A  
4uau\_A  
4uav\_A  
4ub8\_V  
4ub9\_B  
4ub9\_C  
4ub9\_G  
4ubt\_A  
4uc1\_A  
4uc8\_B  
4ucy\_A  
4udj\_B  
4udj\_C  
4udk\_E  
4udr\_A  
4udr\_B  
4ug4\_F  
4uhd\_A  
4uhg\_A  
4uhq\_B  
4uui\_A  
4uir\_A  
4umb\_B  
4umv\_A  
4un0\_C  
4uni\_A  
4unm\_B

4unm\_B  
4uob\_A  
4uof\_C  
4uoj\_B  
4uop\_B  
4uoq\_A  
4uov\_C  
4uox\_C  
4up9\_A  
4upl\_A  
4uq6\_B  
4uq8\_F  
4uqi\_A  
4uqq\_A  
4uqs\_A  
4uqv\_G  
4uqv\_J  
4us5\_C  
4usr\_A  
4usu\_A  
4ut4\_A  
4utg\_A  
4uu2\_A  
4uui\_A  
4uun\_B  
4uux\_A  
4uvq\_A  
4uw0\_A  
4uw9\_A  
4uwm\_B  
4ux3\_A  
4uxa\_R  
4uxh\_A  
4uxh\_B  
4uxp\_C  
4uxz\_D  
4uy7\_A  
4uyq\_A  
4uyr\_A  
4uzv\_A  
4v07\_A  
4v08\_A  
4v0k\_B  
4v0v\_A  
4v0v\_C  
4v19\_5  
4v19\_9  
4v19\_Q  
4v19\_R  
4v1a\_x  
4v1y\_E  
4v27\_A  
4v2i\_A  
4v32\_B

4v35\_A  
4v3o\_D  
4w1v\_A  
4w4o\_C  
4w5t\_A  
4w66\_A  
4w6q\_C  
4w7j\_C  
4w7n\_B  
4w82\_A  
4w87\_A  
4w8c\_B  
4w8f\_B  
4w8j\_A  
4w8l\_B  
4w8x\_A  
4wa0\_A  
4wad\_A  
4wae\_A  
4wai\_A  
4wat\_A  
4wb2\_C  
4wbd\_A  
4wbt\_A  
4wc2\_A  
4wc6\_A  
4wce\_J  
4wce\_O  
4wcf\_C  
4wcj\_A  
4wdt\_A  
4weo\_D  
4wer\_A  
4wf6\_A  
4wfa\_C  
4wfa\_N  
4wfa\_W  
4wfb\_E  
4wfg\_G  
4wfh\_G  
4wg2\_A  
4wgi\_A  
4wgv\_C  
4whb\_A  
4whi\_A  
4whm\_A  
4whr\_D  
4whx\_A  
4wig\_A  
4wio\_A  
4wiw\_C  
4wjm\_A  
4wm9\_A  
4wn3\_A

4wn3\_A  
4wn9\_D  
4wnb\_A  
4wnh\_A  
4wnj\_B  
4wnx\_A  
4wo1\_A  
4wod\_A  
4wp8\_B  
4wpc\_B  
4wpt\_A  
4wqj\_A  
4wr3\_A  
4wrn\_B  
4wso\_A  
4wu2\_A  
4wu3\_D  
4wuv\_A  
4wvb\_A  
4wvz\_D  
4ww3\_A  
4ww7\_A  
4wwd\_A  
4wwu\_C  
4wwu\_H  
4wwu\_J  
4wwx\_B  
4wwx\_B  
4wx0\_A  
4wxe\_A  
4wxj\_B  
4wxv\_A  
4wxw\_A  
4wy0\_I  
4wyd\_B  
4wyl\_A  
4wyp\_B  
4wza\_D  
4wzf\_B  
4wzq\_A  
4x0o\_E  
4x0u\_D  
4x1t\_A  
4x20\_B  
4x2q\_C  
4x2v\_D  
4x2z\_A  
4x3k\_B  
4x3l\_B  
4x3n\_A  
4x3s\_B  
4x49\_A  
4x4r\_A  
4x4v\_A

4x5d\_A  
4x62\_T  
4x63\_A  
4x64\_T  
4x66\_T  
4x7g\_A  
4x7r\_B  
4x8y\_A  
4x9d\_D  
4xa7\_A  
4xau\_C  
4xb1\_B  
4xb6\_D  
4xb6\_G  
4xb6\_H  
4xbm\_B  
4xbo\_A  
4xbz\_C  
4xbz\_E  
4xc3\_H  
4xc5\_C  
4xc7\_B  
4xcq\_A  
4xcv\_A  
4cx\_A  
4xea\_A  
4xed\_A  
4xer\_A  
4xfa\_A  
4xga\_A  
4xgl\_A  
4xgp\_B  
4xgq\_E  
4xgu\_B  
4xgv\_B  
4xh7\_A  
4xhe\_B  
4xhg\_A  
4xhn\_A  
4xiv\_B  
4xj2\_A  
4xje\_A  
4xlo\_B  
4xlo\_C  
4xm2\_D  
4xmh\_A  
4xnh\_A  
4xnh\_C  
4xo6\_A  
4xoq\_A  
4xpl\_A  
4xps\_A  
4xqm\_A  
4xre\_A

4xrf\_A  
4xrn\_C  
4xrp\_D  
4xsh\_B  
4xt0\_A  
4xt4\_A  
4xt5\_A  
4xun\_A  
4xup\_C  
4xut\_C  
4xva\_G  
4vxv\_B  
4xvz\_C  
4xw2\_A  
4xwp\_A  
4xx6\_B  
4xx9\_A  
4xxf\_A  
4xxf\_A  
4xxi\_A  
4xxi\_B  
4xxl\_A  
4xyb\_B  
4xym\_A  
4xym\_B  
4xz6\_A  
4xz9\_C  
4xzi\_A  
4y0e\_H  
4y0h\_D  
4y1q\_M  
4y2h\_B  
4y2w\_B  
4y3o\_B  
4y4j\_A  
4y4n\_F  
4y4v\_B  
4y5t\_A  
4y5u\_B  
4y67\_A  
4y6g\_B  
4y6l\_A  
4y6s\_A  
4y6z\_N  
4y6z\_Z  
4y70\_Z  
4y7o\_B  
4y7o\_C  
4y7s\_A  
4y7s\_B  
4y7x\_G  
4y7x\_N  
4y7y\_G  
4y8a\_B

4y8g\_G  
4y8l\_G  
4y8p\_Z  
4y8s\_I  
4y8u\_K  
4y9l\_B  
4ya0\_G  
4ya2\_G  
4ya3\_G  
4yac\_A  
4yai\_B  
4yan\_A  
4yb5\_C  
4ybg\_A  
4ybr\_B  
4ybz\_A  
4ybz\_D  
4yc4\_A  
4yca\_A  
4yca\_B  
4ycu\_B  
4yda\_A  
4ydo\_A  
4ydo\_A  
4ydu\_C  
4yef\_G  
4yeh\_B  
4yer\_A  
4ygf\_A  
4ygf\_G  
4ygs\_A  
4yh2\_D  
4yhh\_E  
4yia\_B  
4yic\_B  
4yjh\_A  
4ykk\_B  
4ylr\_A  
4ymg\_B  
4ymi\_B  
4ymp\_A  
4ymu\_D  
4ymz\_A  
4yn0\_A  
4ynt\_A  
4yo8\_A  
4yo9\_A  
4yok\_A  
4yol\_A  
4yor\_A  
4yot\_A  
4yp5\_B  
4yp9\_B  
4ypl\_F



4ypq\_A  
4ypt\_A  
4yrb\_D  
4yrc\_A  
4yri\_A  
4yse\_C  
4ysh\_A  
4ysn\_C  
4ysx\_G  
4ysy\_C  
4ysy\_E  
4yt5\_B  
4ytn\_G  
4yu9\_C  
4yut\_B  
4yw7\_P  
4ywa\_D  
4ywm\_B  
4ywm\_G  
4ywo\_A  
4ywr\_A  
4yxb\_A  
4yxo\_A  
4yxp\_B  
4yy3\_N  
4yzo\_A  
4yzo\_C  
4z0h\_O  
4z1k\_A  
4z1o\_B  
4z24\_A  
4z25\_F  
4z26\_B  
4z33\_A  
4z3u\_B  
4z4i\_A  
4z7f\_B  
4z7j\_A  
4z7m\_B  
4z89\_B  
4z8i\_A  
4z8w\_A  
4z94\_G  
4z94\_G  
4z9d\_A  
4z9d\_C  
4z9i\_B  
4z9k\_A  
4z9n\_B  
4z9v\_A  
4za6\_B  
4za8\_A  
4zad\_A  
4zan\_A

4zbg\_A  
4zbt\_D  
4zef\_A  
4zel\_A  
4zew\_B  
4zfk\_B  
4zg5\_C  
4zgd\_E  
4zgj\_M  
4zgl\_I  
4zgp\_A  
4zgs\_D  
4zht\_A  
4zi5\_A  
4zia\_B  
4zil\_A  
4zir\_A  
4zir\_B  
4ziy\_A  
4zj0\_B  
4zjy\_A  
4zki\_B  
4zlh\_B  
4zlu\_B  
4zm3\_A  
4zm4\_F  
4zm5\_B  
4zm6\_A  
4zm9\_B  
4zmc\_E  
4zme\_A  
4zmi\_A  
4zmr\_A  
4zn3\_B  
4znd\_A  
4znf\_A  
4zp0\_A  
4zpi\_C  
4zqb\_B  
4zqf\_A  
4zr8\_A  
4zrb\_G  
4zrq\_A  
4zsi\_A  
4ztx\_A  
4zu3\_E  
4zu7\_B  
4zu7\_C  
4zvb\_A  
4zxs\_A  
4zxs\_C  
4zxs\_C  
4zxs\_D  
4zya\_A

4zya\_B  
4zz7\_A  
4zz7\_C  
4zzj\_A  
5a05\_D  
5a13\_G  
5a29\_A  
5a2w\_A  
5a30\_A  
5a3m\_D  
5a4d\_D  
5a4e\_C  
5a5e\_A  
5a66\_B  
5a6b\_B  
5a76\_E  
5a7y\_B  
5a8v\_A  
5a95\_A  
5a96\_A  
5a9k\_A  
5a9t\_A  
5a9y\_A  
5aaq\_A  
5aaz\_A  
5ab7\_D  
5ab7\_E  
5aba\_B  
5ac4\_B  
5ad1\_A  
5adz\_A  
5ae3\_C  
5aed\_A  
5af0\_C  
5afu\_I  
5aga\_A  
5aga\_A  
5agd\_B  
5ags\_A  
5ah1\_A  
5ah5\_A  
5ah5\_C  
5ahs\_C  
5ahw\_C  
5aik\_A  
5aix\_A  
5aj3\_c  
5aj3\_p  
5aj3\_R  
5akp\_A  
5amj\_C  
5amk\_B  
5amk\_D  
5an1\_C

5anz\_A  
5ao1\_C  
5aoi\_B  
5apw\_B  
5aqq\_B  
5aqu\_B  
5aqu\_B  
5ar2\_B  
5aup\_I  
5aur\_G  
5ave\_A  
5ax1\_A  
5ax7\_B  
5ayr\_A  
5ayr\_B  
5ayy\_F  
5az0\_A  
5aza\_A  
5azh\_A  
5b0h\_A  
5b0h\_B  
5b0o\_A  
5b0o\_B  
5b0o\_C  
5b0q\_B  
5b1y\_B  
5b3i\_A  
5b47\_A  
5b51\_A  
5b53\_A  
5b5t\_D  
5b6a\_A  
5b6d\_B  
5b6i\_A  
5b7c\_A  
5b7g\_A  
5b7z\_B  
5b82\_A  
5b85\_A  
5bj3\_B  
5bke\_C  
5bn2\_A  
5bnc\_A  
5bnt\_D  
5bo3\_A  
5bo6\_A  
5bou\_N  
5bp2\_A  
5bp7\_B  
5bp9\_A  
5bpx\_A  
5bqf\_A  
5bqm\_C  
5bqq\_B

5bqt\_D  
5bsf\_B  
5bsh\_C  
5bst\_A  
5bt9\_C  
5btX\_A  
5bu2\_C  
5bul\_A  
5buq\_B  
5buv\_A  
5bv2\_P  
5bva\_A  
5bw4\_B  
5bwe\_A  
5bwe\_B  
5bwj\_A  
5bwj\_A  
5bxi\_D  
5bxr\_B  
5bxt\_B  
5bxy\_B  
5by0\_A  
5by3\_A  
5byh\_D  
5byu\_B  
5c03\_B  
5c03\_B  
5c0u\_A  
5c14\_A  
5c1o\_C  
5c1t\_A  
5c2i\_A  
5c2y\_A  
5c38\_A  
5c3j\_E  
5c3m\_B  
5c3o\_A  
5c55\_A  
5c5u\_B  
5c6f\_L  
5c6t\_A  
5c7e\_D  
5c88\_A  
5c8b\_B  
5c8d\_E  
5c8l\_A  
5cae\_A  
5cbk\_A  
5cc6\_A  
5ccx\_A  
5ccz\_A  
5cd2\_A  
5cd4\_I  
5cd6\_B

5cd6\_C  
5cez\_D  
5cfa\_A  
5cfq\_B  
5cge\_E  
5cgg\_J  
5cgi\_Z  
5cgz\_B  
5ci7\_A  
5cj3\_B  
5cjf\_A  
5ck4\_B  
5ck7\_A  
5cm6\_A  
5cn0\_A  
5cnt\_G  
5cot\_A  
5cov\_A  
5cpo\_B  
5cq1\_B  
5cqk\_A  
5csd\_D  
5esl\_B  
5ess\_A  
5esx\_A  
5ets\_A  
5eu1\_A  
5eu1\_A  
5euj\_A  
5euy\_D  
5evd\_A  
5evu\_D  
5cx6\_B  
5cx7\_E  
5cx7\_H  
5cx7\_K  
5cxk\_F  
5cxm\_D  
5cxx\_B  
5cyp\_A  
5cyr\_A  
5cz2\_E  
5cz2\_J  
5cz2\_K  
5cz8\_K  
5cz8\_K  
5cz9\_L  
5czc\_B  
5czd\_B  
5czo\_D  
5czy\_A  
5d0y\_A  
5d1o\_A  
5d1o\_B

5d27\_A  
5d2e\_A  
5d2n\_C  
5d3x\_A  
5d41\_A  
5d6d\_B  
5d6o\_B  
5d6t\_A  
5d79\_B  
5d7z\_A  
5d88\_A  
5d8h\_C  
5d8x\_E  
5d9g\_A  
5d9p\_B  
5d9u\_B  
5da5\_J  
5da8\_I  
5da9\_A  
5day\_B  
5dbj\_E  
5dbx\_A  
5dcx\_A  
5dcy\_A  
5dds\_A  
5ded\_A  
5deq\_B  
5dgg\_A  
5dgg\_A  
5dgr\_A  
5dii\_D  
5dis\_A  
5dis\_C  
5dj1\_B  
5dj4\_A  
5djg\_H  
5djs\_C  
5dkj\_V  
5dku\_B  
5dle\_D  
5dll\_A  
5dm0\_B  
5dm3\_C  
5dm7\_H  
5dmh\_A  
5dmp\_A  
5dnd\_D  
5dnf\_D  
5dnf\_G  
5dnk\_A  
5dok\_A  
5dok\_B  
5dot\_A  
5dp2\_A

5dpl\_A  
5dt9\_A  
5dte\_B  
5duq\_A  
5duv\_D  
5dv2\_A  
5dvi\_B  
5dwk\_C  
5dwn\_A  
5dx5\_A  
5dx9\_A  
5dxv\_A  
5dyl\_A  
5dy9\_E  
5dyx\_A  
5dze\_A  
5dzq\_O  
5e02\_A  
5e16\_A  
5e1q\_A  
5e1q\_B  
5e1r\_E  
5e2q\_A  
5e40\_A  
5e44\_A  
5e4w\_D  
5e68\_A  
5e6f\_A  
5e6f\_A  
5e72\_A  
5e79\_I  
5e7c\_k  
5e7g\_A  
5e7t\_L  
5e8j\_B  
5e98\_A  
5e9a\_D  
5e9h\_A  
5e9s\_A  
5e9s\_B  
5e9u\_G  
5ea2\_C  
5ea2\_G  
5eaf\_B  
5eb2\_A  
5ec2\_C  
5eck\_E  
5eck\_F  
5ecm\_E  
5ed8\_A  
5edl\_A  
5edu\_B  
5ee3\_B  
5eef\_B



5eev\_D  
5eex\_G  
5eey\_J  
5eey\_P  
5eez\_H  
5ef0\_F  
5ef1\_O  
5ef8\_B  
5efv\_A  
5egj\_A  
5egp\_A  
5ehi\_C  
5eik\_A  
5ein\_C  
5eio\_A  
5eiy\_A  
5eiy\_B  
5eiy\_B  
5ej0\_A  
5ej6\_B  
5ej6\_D  
5eja\_D  
5ek8\_A  
5ekc\_E  
5eku\_B  
5el2\_A  
5eld\_A  
5elm\_B  
5em2\_A  
5emi\_A  
5emw\_D  
5enj\_A  
5eoh\_A  
5eom\_C  
5eow\_A  
5epo\_A  
5epv\_A  
5eq6\_A  
5eq8\_A  
5eq9\_B  
5eqb\_A  
5eqn\_A  
5er3\_A  
5er7\_A  
5erg\_B  
5erl\_B  
5erl\_D  
5erl\_D  
5es4\_D  
5esj\_A  
5esk\_A  
5ess\_A  
5esv\_G  
5esx\_A

5euo\_G  
5eur\_A  
5evy\_X  
5ex1\_C  
5ex8\_A  
5exr\_F  
5ez2\_B  
5ez3\_C  
5ez7\_A  
5ezb\_A  
5ezu\_A  
5ezv\_C  
5f0p\_B  
5f11\_A  
5f1x\_A  
5f2k\_A  
5f2t\_A  
5f2v\_S  
5f4w\_C  
5f5n\_A  
5f5x\_A  
5f6b\_A  
5f74\_A  
5f7h\_B  
5f7j\_E  
5f7p\_A  
5f84\_A  
5f8e\_A  
5fa1\_A  
5fac\_D  
5fag\_A  
5fak\_A  
5fak\_E  
5fal\_A  
5faw\_B  
5fb3\_C  
5fc9\_A  
5fcy\_A  
5ff5\_B  
5fg3\_A  
5fg6\_A  
5fg9\_G  
5fg9\_V  
5fgf\_L  
5fgi\_N  
5fgn\_A  
5fhh\_A  
5fhi\_A  
5fj9\_I  
5fja\_B  
5fjn\_A  
5fjq\_B  
5fk0\_B  
5fk1\_A

5flh\_A  
5flh\_A  
5flx\_D  
5fm8\_B  
5fmc\_B  
5fn0\_A  
5fnk\_A  
5fno\_B  
5fo5\_A  
5fo5\_A  
5foe\_B  
5fph\_D  
5fq0\_A  
5fq0\_C  
5fq6\_M  
5fq8\_A  
5fql\_A  
5fr1\_B  
5fr2\_B  
5frd\_A  
5frf\_A  
5frr\_C  
5fru\_B  
5frw\_B  
5fsc\_A  
5fsx\_A  
5ft0\_A  
5ftb\_A  
5ftf\_A  
5ftt\_D  
5ftt\_G  
5ftu\_C  
5ftu\_D  
5ftw\_A  
5fu2\_B  
5fub\_A  
5fue\_D  
5fv0\_B  
5fvj\_A  
5fwn\_A  
5fwt\_A  
5fyg\_A  
5fyo\_A  
5fzo\_B  
5g0a\_B  
5g0j\_A  
5g0v\_B  
5g0y\_B  
5g12\_B  
5g17\_B  
5g1f\_B  
5g2t\_A  
5g3u\_A  
5g49\_B

5g4i\_A  
5g4l\_B  
5g50\_A  
5g54\_A  
5g5s\_A  
5g6s\_B  
5gaf\_i  
5gag\_R  
5gag\_Y  
5gg6\_B  
5ggx\_D  
5gif\_A  
5gii\_A  
5gio\_M  
5giv\_A  
5giv\_C  
5gja\_A  
5gjo\_A  
5gju\_A  
5gkq\_B  
5gl5\_A  
5glz\_D  
5gm2\_B  
5gmd\_A  
5gmf\_A  
5gmf\_A  
5gmk\_F  
5gnf\_A  
5gnr\_A  
5gny\_D  
5go5\_A  
5goo\_A  
5gox\_A  
5gp9\_A  
5gpo\_B  
5gpy\_A  
5gqo\_A  
5grb\_B  
5gre\_A  
5grk\_B  
5gs9\_C  
5gsm\_B  
5gss\_B  
5gt1\_A  
5gt7\_C  
5gt9\_B  
5gtd\_A  
5gti\_v  
5gtl\_B  
5gud\_E  
5gug\_A  
5gux\_C  
5gv2\_C  
5gvc\_A

5gvd\_B  
5gvi\_A  
5gvw\_C  
5gvx\_A  
5gvy\_B  
5gwd\_B  
5gwe\_A  
5gwe\_B  
5gwt\_C  
5gx1\_A  
5gx3\_A  
5gx6\_B  
5gxe\_A  
5gy6\_A  
5gyd\_C  
5gyr\_J  
5gzk\_B  
5gzs\_A  
5h0o\_A  
5h1w\_A  
5h20\_A  
5h29\_A  
5h2d\_A  
5h2f\_y  
5h2j\_A  
5h40\_B  
5h4g\_A  
5h59\_A  
5h5f\_A  
5h5o\_A  
5h5x\_A  
5h5x\_G  
5h67\_A  
5h6h\_A  
5h6l\_A  
5h75\_D  
5h7k\_A  
5h86\_A  
5h9i\_A  
5h9o\_A  
5ha5\_A  
5hae\_A  
5hbs\_A  
5hc2\_C  
5hc8\_A  
5hc9\_A  
5hcc\_A  
5hcf\_B  
5hcn\_A  
5hdi\_A  
5hdj\_B  
5hdq\_A  
5hes\_A  
5hev\_A

5hev\_B  
5hev\_C  
5hfi\_A  
5hfj\_C  
5hfj\_E  
5hfs\_A  
5hg0\_B  
5hgq\_D  
5hgz\_A  
5hh9\_A  
5hha\_B  
5hi6\_A  
5hi8\_B  
5hjd\_K  
5hjm\_A  
5hjq\_A  
5hkj\_A  
5hkk\_G  
5hkv\_B  
5hkv\_K  
5hkv\_Z  
5hl7\_O  
5hli\_A  
5hm7\_A  
5hma\_A  
5hmn\_B  
5hnm\_B  
5hnu\_A  
5ho1\_A  
5hob\_F  
5hp8\_C  
5hqw\_A  
5hqx\_A  
5hs3\_C  
5hsa\_F  
5hsg\_A  
5hsi\_B  
5hsj\_A  
5ht7\_A  
5huq\_B  
5huv\_A  
5hux\_A  
5hv1\_A  
5hve\_A  
5hw4\_A  
5hwe\_A  
5hwn\_B  
5hwo\_A  
5hws\_C  
5hxh\_B  
5hy5\_A  
5hyb\_A  
5hzd\_A  
5hzi\_A

5i0j\_A  
5i0k\_A  
5i0m\_B  
5i1w\_A  
5i26\_C  
5i29\_A  
5i4e\_A  
5i56\_A  
5i5b\_A  
5i5g\_A  
5i6c\_A  
5i7f\_G  
5i7v\_B  
5i89\_A  
5i8q\_B  
5i8x\_C  
5i93\_A  
5i9k\_A  
5iaa\_A  
5ib0\_B  
5ib5\_D  
5ibq\_A  
5icu\_A  
5idm\_A  
5idu\_C  
5idy\_B  
5ie3\_B  
5ie9\_C  
5ien\_A  
5if9\_A  
5ifk\_A  
5ifl\_I  
5ifl\_K  
5ifm\_C  
5ig2\_B  
5igj\_A  
5ihk\_A  
5iiq\_A  
5iit\_C  
5ij6\_A  
5ijg\_B  
5ijj\_A  
5ijw\_B  
5iki\_B  
5ikj\_A  
5iky\_A  
5ilo\_B  
5ini\_F  
5inj\_A  
5ion\_A  
5iov\_B  
5iov\_C  
5ip9\_J  
5ipp\_A

5irm\_C  
5irr\_B  
5is2\_A  
5isp\_X  
5isx\_A  
5it1\_C  
5it9\_b  
5it9\_N  
5it9\_X  
5itv\_C  
5itv\_D  
5itz\_B  
5iun\_D  
5iun\_E  
5iw8\_B  
5iwa\_S  
5iwc\_B  
5iwl\_A  
5iwq\_A  
5iwx\_A  
5ixo\_A  
5iy5\_B  
5iz3\_A  
5iz4\_A  
5izd\_A  
5izk\_A  
5izl\_A  
5j0a\_B  
5j1j\_A  
5j1m\_A  
5j1s\_B  
5j33\_G  
5j3t\_B  
5j4e\_B  
5j4n\_A  
5j4y\_A  
5j5k\_A  
5j5l\_A  
5j5r\_A  
5j5t\_A  
5j60\_D  
5j62\_B  
5j67\_C  
5j6f\_A  
5j6p\_B  
5j6s\_A  
5j7a\_A  
5j7i\_C  
5j7k\_B  
5j7k\_B  
5j7m\_B  
5j7r\_B  
5j8t\_A  
5j9c\_A



5j9w\_E  
5ja0\_F  
5jap\_A  
5jbd\_B  
5jbi\_B  
5jbx\_B  
5jc8\_D  
5jcz\_C  
5j dj\_A  
5jdx\_A  
5je1\_A  
5je8\_B  
5jes\_B  
5jfm\_B  
5jfo\_C  
5jh8\_A  
5jhs\_Z  
5jhy\_A  
5ji5\_A  
5jia\_D  
5jil\_A  
5jip\_A  
5jiz\_A  
5jj5\_A  
5jk4\_A  
5jla\_D  
5jmd\_A  
5jmq\_A  
5jn5\_A  
5jn9\_C  
5jnb\_A  
5jnb\_A  
5jne\_A  
5jnl\_B  
5jo2\_A  
5jo9\_A  
5jov\_A  
5joz\_A  
5jqt\_A  
5jrk\_A  
5jrz\_A  
5jsf\_A  
5jtj\_A  
5jug\_A  
5juy\_D  
5jv4\_A  
5jvg\_3  
5jvg\_M  
5jvm\_B  
5jw1\_A  
5jxm\_A  
5jxp\_A  
5jy1\_B  
5jy9\_B

5jys\_A  
5jzv\_A  
5jzx\_A  
5k04\_B  
5k0n\_B  
5k16\_B  
5k1j\_B  
5k1r\_A  
5k1r\_B  
5k1v\_A  
5k21\_A  
5k21\_B  
5k27\_A  
5k2m\_I  
5k3w\_A  
5k5b\_A  
5k5t\_A  
5k5w\_B  
5k5z\_D  
5k75\_D  
5k7g\_D  
5k7h\_A  
5k7j\_B  
5k7u\_A  
5k82\_B  
5k8o\_D  
5k8z\_C  
5k99\_C  
5k9g\_A  
5kaf\_h  
5kaf\_Y  
5kag\_D  
5kag\_I  
5kai\_K  
5kay\_A  
5kay\_B  
5kbk\_A  
5kbw\_B  
5kc4\_A  
5kca\_A  
5kci\_A  
5kd2\_A  
5kd5\_A  
5kdj\_A  
5kds\_A  
5kdv\_A  
5ke1\_B  
5ker\_B  
5ket\_A  
5kh0\_A  
5kh4\_A  
5kha\_A  
5kha\_B  
5kiv\_A

5kiw\_A  
5kiw\_B  
5kj5\_D  
5kj7\_D  
5kja\_A  
5kjd\_B  
5k19\_A  
5klb\_B  
5klk\_D  
5klm\_A  
5klm\_D  
5klv\_E  
5kmd\_D  
5kmq\_B  
5kn5\_C  
5knu\_A  
5koy\_A  
5kp7\_B  
5kpf\_B  
5kq8\_A  
5kqu\_C  
5kqw\_A  
5kr6\_B  
5ks1\_A  
5ks8\_F  
5ksa\_A  
5kt0\_A  
5ktk\_A  
5kvc\_A  
5kvp\_A  
5kwk\_B  
5kx5\_F  
5ky2\_A  
5ky5\_A  
5ky7\_A  
5kyn\_A  
5kyo\_E  
5kyo\_F  
5kyx\_B  
5kzn\_A  
5102\_B  
510z\_A  
5112\_C  
511t\_A  
5126\_A  
512r\_A  
513d\_A  
513w\_A  
513z\_A  
5142\_B  
5154\_G  
515a\_L  
515i\_G  
515p\_b

515r\_N  
515u\_A  
515w\_M  
515w\_M  
5162\_Z  
5164\_J  
5167\_Y  
516h\_C  
516k\_A  
517u\_B  
5189\_d  
518a\_A  
518b\_D  
518q\_C  
5195\_B  
519o\_B  
519w\_b  
51a9\_A  
51aa\_A  
51az\_A  
51c5\_P  
51c5\_R  
51cb\_A  
51cd\_D  
51cp\_A  
51cx\_A  
51d9\_A  
51dq\_C  
51dq\_D  
51dw\_P  
51dw\_R  
51dx\_P  
51e5\_K  
51ex\_J  
51f0\_L  
51f2\_B  
51f4\_K  
51fu\_A  
51fz\_A  
51hd\_C  
51hs\_A  
51hs\_A  
51hu\_A  
51ie\_B  
51iv\_A  
51j3\_V  
51j5\_C  
51jt\_A  
51jw\_A  
51k9\_B  
51kd\_A  
51kf\_A  
51kk\_A  
51l9\_A

5lla\_A  
5llb\_B  
5llt\_A  
5llw\_B  
5llz\_A  
5lm9\_A  
5lms\_W  
5ln4\_C  
5ln5\_A  
5lne\_B  
5lnk\_J  
5lnk\_M  
5lnk\_X  
5loe\_A  
5log\_B  
5lok\_E  
5lor\_A  
5los\_A  
5lpg\_A  
5lq4\_B  
5lrg\_C  
5lrr\_B  
5ls0\_B  
5ls0\_B  
5lsf\_A  
5lsf\_B  
5lsq\_A  
5lst\_A  
5lt9\_B  
5lth\_A  
5ltm\_A  
5ltw\_L  
5luf\_B  
5luf\_d  
5luf\_E  
5lug\_B  
5lv0\_A  
5lvo\_A  
5lvp\_B  
5lvs\_A  
5lvv\_A  
5lw3\_A  
5lwe\_A  
5lwk\_B  
5lxg\_A  
5ly0\_A  
5lyv\_B  
5lzg\_A  
5m0i\_C  
5m0p\_A  
5m1e\_A  
5m1p\_B  
5m21\_H  
5m2f\_X

5m2s\_A  
5m4l\_A  
5m45\_F  
5m4k\_A  
5m4o\_F  
5m54\_B  
5m6d\_A  
5m78\_A  
5m7f\_A  
5m7h\_A  
5m7o\_A  
5m86\_J  
5m8b\_A  
5m99\_A  
5m9n\_B  
5mau\_B  
5mbx\_A  
5mcl\_A  
5med\_A  
5mek\_A  
5mfl\_A  
5mfd\_F  
5mfe\_B  
5mg5\_Q  
5mg5\_T  
5mgu\_A  
5mgy\_H  
5mgz\_A  
5mi4\_A  
5mio\_C  
5mj7\_A  
5mkc\_E  
5mkf\_B  
5mki\_C  
5mki\_E  
5mkw\_A  
5mlv\_D  
5mlv\_F  
5mm1\_A  
5mm7\_K  
5mmi\_2  
5mmi\_4  
5mmi\_6  
5mmi\_7  
5mmi\_E  
5mmi\_H  
5mmi\_P  
5mmi\_R  
5mmi\_T  
5mmi\_U  
5mmi\_X  
5mmi\_Y  
5mmj\_x  
5mmj\_x

5mmx\_A  
5mnn\_A  
5mns\_E  
5mob\_A  
5mor\_A  
5mox\_A  
5mpt\_A  
5mq5\_B  
5mqp\_G  
5mqt\_A  
5mr6\_T  
5mrl\_A  
5ms9\_A  
5msl\_A  
5msr\_B  
5mss\_A  
5msz\_A  
5mt3\_L  
5mtd\_B  
5mtw\_A  
5mua\_B  
5mul\_A  
5mv8\_A  
5mva\_A  
5mvy\_H  
5mw9\_A  
5mwk\_A  
5mx0\_B  
5mx1\_A  
5mx2\_m  
5mx6\_D  
5mz2\_I  
5mza\_B  
5mzx\_D  
5n05\_A  
5n07\_A  
5n0c\_A  
5n0e\_A  
5n0s\_B  
5n16\_D  
5n1e\_A  
5n1o\_A  
5n1p\_D  
5n1s\_A  
5n1t\_W  
5n2i\_A  
5n2j\_B  
5n2n\_A  
5n5d\_A  
5n5s\_C  
5n5y\_R  
5n60\_Q  
5n62\_B  
5n6n\_C

5n6u\_A  
5n6y\_A  
5n77\_D  
5n7y\_A  
5n80\_A  
5n9u\_A  
5na4\_A  
5na7\_A  
5nb8\_B  
5nbd\_B  
5nbp\_B  
5nc3\_A  
5nc8\_A  
5ncc\_D  
5ncj\_A  
5ncx\_A  
5nd7\_C  
5ndc\_B  
5ne2\_B  
5neu\_1  
5nf3\_A  
5nfj\_C  
5nfm\_A  
5nfn\_C  
5nfq\_A  
5ng3\_A  
5ng6\_C  
5ng6\_E  
5ng7\_B  
5ngl\_B  
5ni6\_A  
5nii\_B  
5nja\_A  
5njf\_C  
5nkk\_D  
5n19\_B  
5nli\_B  
5nm8\_A  
5nmi\_Q  
5nmp\_B  
5nmp\_I  
5nmw\_A  
5nno\_A  
5no2\_N  
5no2\_N  
5no2\_T  
5no3\_P  
5no3\_T  
5no9\_B  
5nqa\_A  
5nrd\_A  
5nrg\_C  
5nrh\_B  
5nsf\_B



5nsw\_C  
5nt4\_B  
5ntt\_A  
5nuf\_B  
5nul\_A  
5nut\_A  
5nv1\_A  
5nvo\_A  
5nx5\_A  
5nxa\_H  
5nxb\_B  
5nxm\_A  
5nxr\_A  
5nxr\_A  
5nyn\_A  
5nz2\_A  
5nz1\_A  
5nzz\_D  
5o0x\_A  
5o1e\_B  
5o1o\_A  
5o2z\_B  
5o3n\_A  
5o3w\_B  
5o4j\_A  
5o4n\_A  
5o5c\_D  
5o5j\_F  
5o5z\_B  
5o60\_F  
5o60\_g  
5o60\_Y  
5o6y\_B  
5o7x\_A  
5o7x\_D  
5o7x\_J  
5o7y\_A  
5o80\_A  
5o8e\_A  
5o8p\_B  
5o8z\_B  
5o96\_D  
5o9b\_A  
5o9b\_A  
5o9x\_A  
5oa4\_A  
5oat\_F  
5oay\_A  
5oba\_L  
5oba\_R  
5obu\_A  
5oby\_A  
5ocl\_A  
5oc2\_B

5oc3\_A  
5oc7\_D  
5oce\_A  
5ocs\_C  
5od1\_A  
5odc\_D  
5odh\_J  
5odi\_F  
5odi\_L  
5odj\_A  
5odo\_B  
5odr\_H  
5odu\_E  
5oea\_B  
5oed\_A  
5oed\_B  
5oet\_B  
5oet\_B  
5of3\_C  
5ofx\_E  
5oh1\_A  
5ohe\_F  
5ohf\_G  
5oie\_A  
5oj7\_A  
5oji\_A  
5ok8\_B  
5oke\_C  
5okz\_g  
5okz\_O  
5ol7\_A  
5olc\_F  
5olq\_C  
5olt\_A  
5on0\_A  
5on5\_B  
5onj\_A  
5onm\_A  
5oo4\_A  
5ooh\_A  
5ool\_I  
5ool\_T  
5oom\_g  
5oom\_v  
5oom\_W  
5opf\_A  
5opl\_A  
5opz\_A  
5oqt\_A  
5oqt\_C  
5ot1\_A  
5ot3\_A  
5owc\_B  
5ows\_B

5oxf\_A  
5oxf\_C  
5oyj\_C  
5pgm\_E  
5pgu\_E  
5pgw\_A  
5q28\_A  
5q2k\_A  
5q33\_A  
5q35\_A  
5q37\_A  
5q38\_A  
5q3b\_A  
5q3s\_A  
5q41\_A  
5q4c\_A  
5q5c\_A  
5q5e\_A  
5q5m\_A  
5q5q\_A  
5q5z\_A  
5q6f\_A  
5q6i\_A  
5q6v\_A  
5q75\_A  
5q77\_A  
5q84\_A  
5q8d\_A  
5q9k\_A  
5q9m\_A  
5qqq\_B  
5qqx\_B  
5qrc\_B  
5qt3\_A  
5r99\_A  
5r9b\_A  
5rag\_B  
5raq\_B  
5rav\_A  
5rax\_B  
5rx0\_A  
5rx0\_A  
5std\_C  
5sv0\_A  
5svb\_B  
5svc\_A  
5svc\_C  
5svk\_B  
5svv\_D  
5swc\_B  
5swg\_B  
5sy1\_B  
5sy4\_B  
5syd\_B

5syt\_A  
5sz3\_A  
5t0h\_C  
5t0j\_A  
5t0j\_F  
5t0w\_A  
5t1a\_A  
5t25\_A  
5t2v\_A  
5t38\_A  
5t3v\_B  
5t41\_A  
5t4o\_B  
5t4q\_A  
5t5m\_B  
5t5m\_C  
5t5q\_B  
5t5q\_D  
5t69\_A  
5t6c\_A  
5t7e\_D  
5t8u\_B  
5t8w\_A  
5t96\_B  
5t9x\_A  
5ta6\_A  
5ta8\_A  
5tar\_A  
5tbx\_A  
5tcs\_B  
5tcx\_A  
5tdf\_B  
5te8\_B  
5tea\_B  
5tem\_A  
5tes\_B  
5tew\_A  
5tex\_A  
5tg6\_A  
5tgc\_D  
5tgf\_C  
5tgq\_A  
5thj\_A  
5thk\_B  
5thp\_L  
5thq\_A  
5thq\_C  
5tht\_A  
5thz\_B  
5ti1\_A  
5ti1\_H  
5ti8\_A  
5tip\_C  
5tir\_A

5tis\_V  
5tis\_v  
5tk5\_A  
5tkf\_A  
5tkh\_A  
5tl7\_D  
5tlb\_A  
5tls\_A  
5tmb\_A  
5tme\_A  
5tnv\_A  
5tnx\_A  
5tou\_C  
5tpv\_B  
5tq2\_A  
5trl\_A  
5ts2\_C  
5ts3\_A  
5ts3\_B  
5tsd\_B  
5tt8\_F  
5ttk\_C  
5tu5\_A  
5tue\_A  
5tvG\_G  
5tvn\_A  
5tvo\_A  
5tvq\_A  
5tvu\_A  
5tvx\_B  
5tw7\_F  
5twj\_B  
5tx6\_A  
5txk\_A  
5txk\_A  
5txr\_A  
5txu\_A  
5txv\_G  
5txv\_J  
5ty8\_A  
5tzb\_E  
5tzj\_C  
5u02\_A  
5u0m\_A  
5u1a\_L  
5ule\_A  
5ulp\_A  
5u27\_A  
5u4q\_A  
5u4s\_B  
5u51\_C  
5u58\_A  
5u5g\_A  
5u5n\_B

5u6p\_A  
5u6z\_A  
5u7w\_A  
5u7x\_F  
5u9e\_A  
5u9l\_A  
5u9p\_B  
5u9z\_B  
5u9z\_B  
5uag\_I  
5uam\_A  
5uam\_A  
5uao\_A  
5uav\_D  
5ub6\_B  
5uba\_A  
5ucd\_A  
5ucm\_B  
5ucv\_A  
5ucw\_B  
5ud5\_B  
5udu\_A  
5ufd\_A  
5ufe\_B  
5ufl\_A  
5ufn\_A  
5ufv\_A  
5ugr\_A  
5uhs\_B  
5uid\_A  
5uin\_A  
5uio\_C  
5uis\_C  
5uj5\_A  
5ujc\_A  
5ujm\_E  
5ujp\_A  
5uju\_A  
5ujv\_A  
5uli\_A  
5ulj\_A  
5ume\_E  
5umf\_C  
5umw\_F  
5un7\_A  
5uof\_B  
5uph\_B  
5uqi\_A  
5uqk\_A  
5uqp\_B  
5uqr\_A  
5uqr\_B  
5uqt\_A  
5uqz\_A

5urr\_H  
5urs\_C  
5us1\_C  
5uu3\_B  
5uv4\_A  
5uve\_B  
5uve\_H  
5uvg\_A  
5uwc\_G  
5uwx\_D  
5uwz\_A  
5ux7\_B  
5ux9\_A  
5uxe\_B  
5uyy\_C  
5uz4\_Z  
5uzk\_A  
5uzs\_D  
5uzu\_A  
5uzx\_A  
5v0f\_A  
5v0s\_B  
5v2c\_o  
5v2p\_A  
5v2w\_B  
5v3u\_A  
5v4b\_B  
5v4t\_B  
5v57\_A  
5v69\_A  
5v6j\_B  
5v7m\_A  
5v7p\_A  
5v7y\_A  
5v8s\_B  
5v8t\_B  
5v96\_D  
5va8\_D  
5vao\_D  
5vbl\_B  
5vcb\_D  
5vcb\_f  
5vcm\_B  
5vev\_A  
5vdf\_A  
5vdf\_E  
5vdq\_B  
5vdr\_A  
5vdw\_A  
5ve4\_A  
5veg\_B  
5ver\_B  
5veu\_H  
5vf0\_B

5vg1\_A  
5vg1\_A  
5vg1\_B  
5vg2\_C  
5vgr\_A  
5vgz\_c  
5vhd\_D  
5via\_A  
5vie\_C  
5vj0\_D  
5vj1\_L  
5vju\_A  
5vk4\_B  
5vki\_B  
5vko\_B  
5vkw\_A  
5vkw\_A  
5vkx\_A  
5vm8\_B  
5vmq\_C  
5vmt\_H  
5vn2\_C  
5vn2\_D  
5vn4\_B  
5vn5\_C  
5vn6\_A  
5vng\_A  
5vol\_C  
5vop\_B  
5vp3\_A  
5vp3\_A  
5vpl\_A  
5vpn\_E  
5vqa\_A  
5vqb\_C  
5vqh\_A  
5vrh\_A  
5vsv\_B  
5vt1\_A  
5vug\_A  
5vww\_A  
5vx0\_C  
5vyf\_F  
5vyq\_B  
5vyt\_B  
5vyt\_C  
5vz0\_C  
5vzt\_B  
5w0o\_A  
5w0p\_A  
5w10\_A  
5w15\_D  
5w1m\_Q  
5w21\_A



5w23\_C  
5w23\_C  
5w3v\_A  
5w45\_A  
5w4a\_D  
5w4y\_A  
5w57\_B  
5w58\_A  
5w5r\_U  
5w6h\_A  
5w6y\_A  
5w71\_A  
5w7k\_A  
5w7l\_A  
5w7p\_A  
5w8a\_A  
5w8u\_C  
5w8x\_A  
5wa0\_D  
5wai\_B  
5wam\_B  
5wat\_A  
5wau\_I  
5way\_A  
5wb2\_B  
5wba\_A  
5wbg\_C  
5wbg\_E  
5wch\_A  
5wci\_A  
5wcj\_A  
5wcn\_M  
5wda\_D  
5we0\_A  
5we2\_B  
5we8\_B  
5wee\_C  
5weo\_C  
5wew\_A  
5wfg\_E  
5whg\_A  
5whm\_A  
5whv\_J  
5whx\_B  
5wid\_A  
5wjd\_A  
5wjs\_B  
5wk0\_A  
5wk4\_F  
5wk7\_A  
5wm3\_A  
5wml\_A  
5wnr\_I  
5wnv\_T

5wo6\_A  
5wob\_C  
5woo\_A  
5wpk\_B  
5wq0\_D  
5wqh\_E  
5wqo\_A  
5ws5\_k  
5ws8\_D  
5wt3\_A  
5wtq\_A  
5wtz\_A  
5wu2\_A  
5wud\_A  
5wuq\_C  
5wve\_F  
5wve\_N  
5wvp\_A  
5wvu\_A  
5wvx\_A  
5wws\_A  
5wwv\_A  
5wwx\_A  
5wxb\_A  
5wxu\_B  
5wz1\_C  
5wzv\_A  
5x03\_B  
5x0b\_A  
5x13\_A  
5x1f\_S  
5x1h\_Q  
5x1t\_A  
5x20\_C  
5x2a\_B  
5x2e\_A  
5x2m\_L  
5x2n\_B  
5x2n\_C  
5x2r\_C  
5x2r\_K  
5x2s\_J  
5x2u\_C  
5x37\_A  
5x39\_A  
5x3t\_H  
5x40\_B  
5x42\_A  
5x4a\_A  
5x4z\_X  
5x51\_J  
5x57\_A  
5x62\_B  
5x66\_D

5x6a\_B  
5x6c\_B  
5x71\_A  
5x7e\_A  
5x7f\_A  
5x9r\_A  
5x9u\_B  
5x9v\_D  
5xaf\_E  
5xau\_A  
5xbd\_A  
5xbt\_A  
5xbv\_A  
5xco\_A  
5xd6\_B  
5xd8\_B  
5xde\_C  
5xdh\_A  
5xdq\_P  
5xe5\_A  
5xf9\_C  
5xfa\_A  
5xfm\_A  
5xg3\_B  
5xg4\_U  
5xgf\_A  
5xgu\_A  
5xj6\_A  
5xk9\_C  
5xkd\_D  
5xki\_B  
5xko\_A  
5xkr\_B  
5xkr\_D  
5xkx\_A  
5xls\_A  
5xlx\_A  
5xlx\_D  
5xmi\_C  
5xmo\_A  
5xmz\_A  
5xn8\_A  
5xnc\_B  
5xnf\_A  
5xnj\_A  
5xnl\_z  
5xnl\_Z  
5xnm\_t  
5xnr\_A  
5xoi\_A  
5xoy\_A  
5xp5\_A  
5xqg\_H  
5xqj\_F

5xr2\_C  
5xr3\_A  
5xs8\_B  
5xs8\_D  
5xss\_A  
5xt2\_C  
5xtc\_n  
5xtd\_W  
5xte\_G  
5xtg\_B  
5xtk\_A  
5xtr\_D  
5xts\_A  
5xtu\_A  
5xu1\_B  
5xuh\_C  
5xuk\_A  
5xv0\_F  
5xvh\_A  
5xvs\_B  
5xwj\_B  
5xwq\_A  
5xxm\_A  
5xxo\_B  
5xxs\_B  
5xxt\_H  
5xxv\_M  
5xxx\_N  
5xyn\_D  
5y06\_A  
5y0n\_B  
5y2f\_A  
5y2v\_B  
5y31\_D  
5y41\_A  
5y4c\_A  
5y4f\_B  
5y4h\_A  
5y5e\_A  
5y5q\_B  
5y5s\_T  
5y5s\_V  
5y66\_A  
5y79\_A  
5y88\_A  
5y88\_N  
5y8l\_A  
5y8v\_A  
5y8x\_A  
5y8x\_A  
5y9d\_B  
5y9m\_A  
5y9r\_A  
5y9x\_A

5yal\_A  
5ya6\_B  
5ybl\_B  
5ybz\_C  
5yci\_B  
5ycr\_C  
5yd0\_B  
5yf0\_A  
5yfv\_B  
5yg5\_B  
5ygz\_A  
5ygg\_A  
5yh1\_A  
5yh8\_A  
5yho\_A  
5yhr\_A  
5yhv\_D  
5yij\_A  
5yix\_B  
5yiz\_h  
5yj7\_C  
5yja\_C  
5yjd\_A  
5yjl\_B  
5yk0\_A  
5ylb\_A  
5yn8\_A  
5yo9\_B  
5yoe\_A  
5yot\_A  
5yox\_A  
5ypw\_E  
5ypw\_F  
5yq7\_R  
5yqb\_A  
5yql\_A  
5yqw\_A  
5yrt\_G  
5ys0\_B  
5ys9\_A  
5ysc\_A  
5ysf\_A  
5ysm\_A  
5ysn\_B  
5ysq\_B  
5ysr\_B  
5ysr\_D  
5yt7\_D  
5ytk\_A  
5ytk\_E  
5yud\_A  
5yvm\_A  
5yw0\_A  
5yx4\_A

5yy2\_A  
5yym\_A  
5z01\_A  
5z06\_B  
5z0d\_B  
5z0d\_B  
5z0q\_C  
5z16\_B  
5z1b\_A  
5z1b\_B  
5z1q\_C  
5z1z\_A  
5z21\_B  
5z25\_A  
5z2f\_A  
5z34\_A  
5z3f\_A  
5z3q\_H  
5z43\_A  
5z43\_B  
5z48\_B  
5z49\_A  
5z6e\_A  
5z79\_F  
5z8k\_B  
5z8t\_C  
5z8y\_A  
5z9j\_C  
5z9s\_A  
5zb3\_B  
5zba\_A  
5zbf\_A  
5zbj\_A  
5zcm\_A  
5zcr\_B  
5zcr\_B  
5zct\_B  
5zct\_C  
5zct\_E  
5zct\_F  
5zed\_B  
5zer\_A  
5zi5\_A  
5zie\_B  
5ziq\_A  
5ziq\_B  
5zj9\_D  
5zjg\_D  
5zji\_H  
5zjk\_A  
5zlp\_D  
5zm5\_A  
5zmm\_A  
5zmp\_A

5zmu\_D  
5zmy\_F  
5zn7\_D  
5znq\_B  
5znt\_A  
5zov\_A  
5zov\_A  
5zow\_B  
5zpg\_A  
5zpk\_B  
5zpm\_A  
5zps\_A  
5zq0\_A  
5zqr\_A  
5zqs\_A  
5zqv\_C  
5zri\_A  
5zrl\_B  
5zrt\_B  
5zs6\_A  
5zu2\_C  
5zum\_B  
5zvg\_A  
5zvx\_A  
5zw4\_A  
5zw7\_A  
5zwa\_B  
5zwb\_B  
5zxm\_B  
5zy6\_B  
5zyr\_B  
5zzu\_A  
5zzu\_C  
5zzw\_A  
6a17\_A  
6a1w\_A  
6a23\_A  
6a2p\_B  
6a3g\_B  
6a3i\_C  
6a3j\_C  
6a3l\_A  
6a4k\_C  
6a4r\_A  
6a4x\_A  
6a6e\_D  
6a6m\_A  
6a71\_A  
6a72\_B  
6a7a\_A  
6a7c\_A  
6a7i\_A  
6a7t\_B  
6a83\_A

6a87\_A  
6a8c\_B  
6a8i\_A  
6a8s\_A  
6a9a\_A  
6aal\_A  
6ac9\_A  
6ach\_A  
6ach\_C  
6acx\_A  
6adi\_A  
6adq\_H  
6adq\_P  
6aef\_A  
6agb\_K  
6agt\_A  
6ah3\_K  
6ah5\_C  
6ahr\_K  
6ai0\_B  
6ai0\_B  
6aii\_A  
6ain\_B  
6ait\_B  
6ait\_C  
6ajn\_A  
6ajv\_A  
6akv\_A  
6akw\_A  
6akz\_A  
6al9\_A  
6ala\_C  
6alj\_C  
6alp\_A  
6alr\_A  
6am0\_A  
6ang\_A  
6ao7\_A  
6aoj\_A  
6aoj\_A  
6apg\_A  
6apl\_C  
6apl\_F  
6aps\_B  
6aq4\_A  
6aq4\_B  
6aqh\_B  
6aqr\_E  
6aqz\_A  
6arv\_A  
6asl\_A  
6asr\_B  
6asy\_B  
6at3\_A



6at7\_A  
6at7\_B  
6atg\_B  
6awn\_A  
6ax6\_B  
6ay4\_A  
6azq\_G  
6b00\_A  
6b05\_A  
6b0j\_B  
6b1z\_A  
6b2m\_A  
6b2w\_A  
6b39\_A  
6b4e\_A  
6b4e\_D  
6b4i\_F  
6b4j\_F  
6b53\_B  
6b5e\_E  
6b6u\_A  
6b80\_B  
6b82\_A  
6b8s\_B  
6b8w\_B  
6b92\_A  
6b9o\_B  
6b9r\_C  
6b9s\_G  
6b9t\_D  
6b9u\_A  
6ba1\_P  
6bax\_C  
6bax\_D  
6bb2\_E  
6bb2\_G  
6bbm\_W  
6bbr\_A  
6bbw\_A  
6bc3\_A  
6bcc\_A  
6bcq\_D  
6bd4\_A  
6bdd\_A  
6be1\_E  
6be6\_D  
6bea\_A  
6bff\_B  
6bfg\_A  
6bfz\_A  
6bgd\_A  
6bgv\_A  
6bhp\_C  
6bhr\_G

6bht\_C  
6bia\_B  
6bk8\_O  
6bka\_A  
6bky\_A  
6blb\_A  
6bm6\_A  
6bmc\_B  
6bme\_A  
6bn1\_B  
6bnf\_A  
6bnn\_A  
6bq2\_A  
6bq2\_B  
6bjj\_B  
6bqv\_D  
6br7\_B  
6brg\_C  
6brh\_B  
6brl\_A  
6bs5\_A  
6bsu\_B  
6bt9\_B  
6btl\_A  
6btm\_E  
6bxb\_B  
6bys\_A  
6bzt\_C  
6c08\_F  
6c0d\_A  
6c0d\_A  
6c0f\_D  
6c0f\_u  
6c0m\_B  
6c10\_A  
6c1w\_B  
6c2z\_A  
6c32\_A  
6c3p\_C  
6c46\_D  
6c4m\_C  
6c4s\_B  
6c5b\_A  
6c5c\_A  
6c5w\_A  
6c62\_B  
6c6k\_B  
6c6r\_A  
6c71\_C  
6c7p\_B  
6c8q\_A  
6c8r\_A  
6c94\_A  
6c95\_A



6czp\_E  
6czp\_G  
6czz\_C  
6d04\_A  
6d0g\_A  
6d0g\_A  
6d0o\_D  
6d0p\_C  
6d0v\_B  
6d0y\_C  
6d14\_B  
6d24\_B  
6d2v\_A  
6d2y\_A  
6d31\_A  
6d3a\_A  
6d3a\_C  
6d3u\_B  
6d3w\_B  
6d42\_B  
6d4k\_A  
6d4q\_A  
6d50\_A  
6d50\_B  
6d50\_B  
6d57\_A  
6d57\_B  
6d5b\_E  
6d5x\_B  
6d6n\_C  
6d6w\_C  
6d6y\_A  
6d72\_C  
6d7j\_A  
6d8d\_A  
6d8d\_C  
6d97\_D  
6d9y\_B  
6da0\_A  
6da6\_A  
6dam\_A  
6dcb\_A  
6dcd\_A  
6ddh\_A  
6ddr\_C  
6ddt\_A  
6det\_A  
6dex\_A  
6dex\_B  
6dft\_A  
6dft\_F  
6dg8\_E  
6dgi\_A  
6dhw\_A

6dio\_C  
6djm\_D  
6djt\_A  
6dk9\_D  
6dk9\_I  
6dka\_F  
6dka\_G  
6dkd\_A  
6dkh\_D  
6dll\_B  
6dlu\_P  
6dlw\_B  
6dlw\_V  
6dmf\_B  
6dpr\_A  
6dq8\_A  
6dqy\_Q  
6drd\_L  
6drh\_C  
6drs\_A  
6dru\_A  
6ds2\_H  
6dtq\_C  
6du7\_D  
6du7\_F  
6duk\_B  
6dvh\_B  
6dvv\_B  
6dwo\_C  
6dwv\_B  
6dx3\_D  
6dx3\_D  
6dxl\_B  
6d xp\_A  
6dxs\_B  
6dy1\_B  
6dyc\_A  
6dym\_A  
6dzg\_C  
6dzs\_A  
6e0l\_A  
6e0o\_A  
6e0y\_A  
6e0z\_A  
6e0z\_C  
6e2o\_A  
6e2u\_A  
6e2y\_A  
6e36\_B  
6e3a\_A  
6e3l\_I  
6e40\_B  
6e48\_F  
6e70\_B

6e88\_L  
6e88\_N  
6e8i\_A  
6e9f\_B  
6eax\_A  
6eb3\_D  
6ebk\_E  
6ebq\_A  
6ebv\_C  
6ec3\_C  
6eci\_C  
6eci\_O  
6eck\_B  
6ecv\_A  
6ed8\_A  
6edd\_B  
6edw\_B  
6edz\_D  
6ee2\_C  
6eeh\_A  
6eem\_B  
6ef3\_L  
6efx\_A  
6eg5\_E  
6egf\_B  
6egp\_A  
6egp\_A  
6ehf\_A  
6ei9\_B  
6eiq\_A  
6ejj\_A  
6ejx\_A  
6ejx\_D  
6eki\_B  
6el2\_B  
6elc\_A  
6elk\_A  
6elv\_A  
6elv\_A  
6em0\_A  
6emn\_A  
6emv\_A  
6enn\_B  
6enz\_A  
6eo0\_B  
6eo5\_A  
6eoa\_A  
6eop\_A  
6ep5\_B  
6ep5\_F  
6ep6\_B  
6eqi\_C  
6eqo\_A  
6esb\_2

6esd\_B  
6esq\_D  
6esq\_F  
6et7\_A  
6et9\_D  
6eu4\_A  
6eu9\_D  
6euh\_C  
6euo\_A  
6euo\_C  
6euv\_C  
6eve\_C  
6ewq\_A  
6ewq\_C  
6ex0\_B  
6ex6\_A  
6exn\_M  
6eyc\_7  
6eyg\_A  
6eyp\_C  
6eyu\_B  
6eza\_A  
6f03\_A  
6f0b\_A  
6f0k\_E  
6f1a\_A  
6f1t\_C  
6f28\_A  
6f2f\_C  
6f2w\_B  
6f3a\_G  
6f3b\_B  
6f3h\_B  
6f3i\_A  
6f3p\_C  
6f45\_B  
6f4d\_A  
6f4k\_B  
6f4p\_A  
6f4p\_A  
6f5d\_E  
6f5z\_B  
6f67\_B  
6f6j\_B  
6f6j\_C  
6f70\_A  
6f73\_A  
6f74\_B  
6f77\_F  
6f7b\_A  
6f7t\_L  
6f7v\_B  
6f8y\_A  
6f8z\_A

6f91\_C  
6f92\_A  
6fam\_A  
6fat\_A  
6fat\_B  
6fc2\_A  
6fc3\_B  
6fcg\_C  
6fd9\_A  
6fdf\_A  
6fea\_C  
6ff1\_A  
6ff4\_t  
6ff7\_B  
6ffv\_A  
6fgx\_A  
6fh1\_A  
6fhb\_A  
6fhg\_A  
6fhh\_B  
6fhi\_A  
6fho\_A  
6fhs\_C  
6fhs\_J  
6fht\_B  
6fii\_F  
6fij\_B  
6fjg\_A  
6fjg\_B  
6fju\_A  
6fjw\_A  
6fku\_A  
6flg\_B  
6fnn\_D  
6fnq\_A  
6fnu\_A  
6fny\_A  
6fny\_E  
6fok\_A  
6fol\_A  
6fol\_G  
6fon\_C  
6fos\_I  
6fp5\_B  
6fp6\_V  
6fpf\_A  
6fpp\_B  
6fpy\_A  
6fqb\_E  
6fqb\_G  
6frm\_A  
6fsl\_A  
6ftt\_A  
6ful\_B



6fu4\_A  
6fu7\_B  
6fuu\_A  
6fux\_A  
6fuy\_A  
6fv4\_B  
6fv5\_B  
6fvj\_A  
6fwh\_E  
6fyb\_B  
6fyq\_A  
6fze\_A  
6fzi\_C  
6fzv\_A  
6g0n\_A  
6g12\_A  
6g18\_f  
6g18\_y  
6g19\_A  
6g1b\_J  
6g1g\_A  
6g1h\_A  
6g22\_A  
6g2g\_A  
6g2n\_A  
6g33\_A  
6g3f\_A  
6g3y\_A  
6g40\_A  
6g55\_A  
6g5q\_B  
6g5z\_B  
6g63\_N  
6g6t\_A  
6g72\_R  
6g74\_B  
6g7f\_I  
6g7p\_B  
6g80\_M  
6g8m\_Y  
6g8u\_A  
6g90\_U  
6g96\_A  
6g99\_B  
6ga9\_A  
6gar\_A  
6gas\_B  
6gau\_A  
6gbx\_B  
6gck\_A  
6gcl\_B  
6gcp\_B  
6ge8\_A  
6gek\_B

6geq\_A  
6gex\_B  
6gey\_C  
6gfe\_H  
6gfo\_A  
6gfr\_B  
6gg1\_A  
6gg1\_A  
6gg2\_A  
6ggf\_B  
6ggo\_A  
6gh1\_G  
6gh2\_A  
6ghb\_D  
6ghl\_A  
6ghs\_A  
6gi2\_B  
6gi5\_B  
6gio\_C  
6giq\_O  
6giw\_D  
6gku\_A  
6gky\_A  
6gl0\_B  
6gl0\_B  
6gmh\_A  
6gmo\_A  
6gn6\_D  
6gn6\_F  
6gnc\_A  
6gne\_B  
6gng\_B  
6gol\_B  
6goc\_A  
6gop\_L  
6gos\_1  
6gp3\_A  
6gpa\_A  
6gqd\_A  
6grh\_C  
6gs8\_F  
6gtm\_C  
6gur\_B  
6gvw\_B  
6gw6\_D  
6gwf\_A  
6gwu\_A  
6gwu\_B  
6gxu\_B  
6gxz\_A  
6gyx\_B  
6gzh\_A  
6gzo\_B  
6gzt\_A

6gzu\_A  
6h08\_B  
6h0f\_I  
6h0g\_E  
6h17\_A  
6h17\_A  
6h1e\_A  
6h1t\_B  
6h2t\_A  
6h2v\_A  
6h39\_X  
6h3d\_A  
6h3o\_F  
6h3o\_H  
6h42\_A  
6h4c\_B  
6h4c\_H  
6h4l\_A  
6h56\_A  
6h57\_A  
6h5t\_B  
6h65\_C  
6h7d\_A  
6h7e\_A  
6h7e\_B  
6h7f\_A  
6h7f\_C  
6h8n\_A  
6h9b\_B  
6h9f\_C  
6h9h\_B  
6h9v\_A  
6has\_A  
6hau\_B  
6hbv\_B  
6hbw\_C  
6hcz\_B  
6hd0\_A  
6hdb\_B  
6hde\_B  
6hdp\_A  
6hdt\_A  
6hea\_H  
6heg\_A  
6hf3\_A  
6hf4\_A  
6hf7\_B  
6hft\_A  
6hft\_A  
6hg8\_B  
6hgb\_A  
6hhb\_B  
6hhm\_A  
6hik\_A

6hip\_B  
6hit\_D  
6hiu\_A  
6hj3\_C  
6hjd\_A  
6hk5\_B  
6hk7\_A  
6hlm\_C  
6hls\_J  
6hmj\_A  
6hnd\_B  
6hni\_A  
6hnq\_B  
6hp2\_A  
6hpd\_A  
6hph\_A  
6hq3\_B  
6hqd\_B  
6hqm\_A  
6hqn\_A  
6hr5\_A  
6hrc\_C  
6hrk\_B  
6hsd\_A  
6htd\_Z  
6htg\_B  
6htj\_A  
6htl\_A  
6htr\_N  
6htr\_Y  
6hu0\_C  
6hu1\_B  
6hu2\_C  
6hu9\_L  
6hu9\_p  
6huc\_N  
6huc\_V  
6hul\_A  
6hun\_A  
6huu\_K  
6huu\_L  
6hux\_A  
6hv7\_N  
6hv7\_W  
6hvg\_A  
6hvl\_B  
6hvs\_Y  
6hvu\_V  
6hvw\_L  
6hvx\_V  
6hw2\_B  
6hw2\_B  
6hw3\_K  
6hwd\_W

6hwh\_A  
6hxp\_A  
6hxq\_A  
6hyl\_C  
6hy3\_A  
6hyc\_B  
6hyj\_A  
6hyy\_B  
6hze\_A  
6hzn\_A  
6i02\_B  
6i1j\_A  
6i1r\_B  
6i25\_A  
6i28\_A  
6i2x\_B  
6i2z\_A  
6i2z\_B  
6i34\_B  
6i39\_A  
6i3v\_B  
6i3v\_F  
6i5f\_B  
6i5x\_C  
6i79\_B  
6i7g\_B  
6i7l\_A  
6i7s\_B  
6i8e\_B  
6i8f\_A  
6i8f\_B  
6i98\_A  
6i9k\_A  
6ia6\_A  
6iao\_B  
6iaq\_D  
6iau\_B  
6ib8\_B  
6ibb\_C  
6ibi\_A  
6ic2\_A  
6ici\_A  
6icn\_A  
6icz\_A  
6icz\_Z  
6id1\_U  
6idy\_A  
6ie0\_C  
6ie9\_A  
6ien\_B  
6ifc\_A  
6ifd\_A  
6ifi\_B  
6ift\_A

6ify\_A  
6ig2\_D  
6igj\_A  
6igz\_M  
6ihd\_B  
6ihi\_B  
6iih\_A  
6iiy\_A  
6ij9\_C  
6ij9\_D  
6ijb\_B  
6ijm\_A  
6ik5\_B  
6ila\_A  
6ilm\_A  
6iln\_A  
6imc\_C  
6imc\_D  
6ime\_B  
6imv\_A  
6in7\_B  
6inh\_A  
6ioh\_A  
6iop\_A  
6iov\_A  
6iox\_A  
6iq1\_B  
6iqq\_C  
6iqq\_D  
6iqw\_A  
6iri\_A  
6irw\_A  
6isp\_A  
6ist\_C  
6itx\_D  
6iu5\_H  
6iuf\_A  
6iuq\_B  
6iv2\_D  
6iv9\_A  
6ivw\_B  
6iwo\_A  
6iwr\_F  
6ix7\_B  
6ixj\_D  
6ixj\_I  
6ixj\_L  
6ixt\_C  
6iy6\_A  
6iy8\_D  
6iym\_B  
6iyx\_A  
6izh\_C  
6j07\_B

6j0p\_A  
6j0t\_B  
6j38\_A  
6j3f\_B  
6j3g\_A  
6j3h\_A  
6j44\_A  
6j53\_B  
6j55\_A  
6j5w\_A  
6j5x\_A  
6j61\_A  
6j66\_B  
6j6f\_A  
6j6h\_A  
6j6j\_A  
6j6j\_D  
6j6q\_F  
6j71\_A  
6j76\_B  
6j7c\_A  
6j7l\_A  
6j7u\_C  
6j7x\_B  
6j83\_A  
6j9t\_F  
6j9u\_A  
6j9v\_A  
6jai\_A  
6jau\_A  
6jb4\_A  
6jbj\_B  
6jd7\_A  
6jdd\_A  
6jde\_B  
6jdl\_A  
6jdo\_A  
6jeb\_A  
6jf4\_B  
6jf8\_C  
6jf9\_B  
6jfk\_A  
6jfm\_B  
6jhb\_B  
6jhu\_A  
6jif\_A  
6jix\_A  
6jiz\_C  
6jj7\_A  
6jkh\_A  
6jki\_B  
6jko\_B  
6jqp\_D  
6jks\_B

6jks\_D  
6jku\_A  
6jl5\_B  
6jl9\_A  
6jl9\_A  
6jlj\_z  
6jlk\_j  
6jll\_J  
6jll\_V  
6jll\_z  
6jln\_F  
6jlo\_v  
6jlo\_z  
6jls\_A  
6jmq\_B  
6jmt\_D  
6jn7\_A  
6jo0\_A  
6jow\_A  
6jpb\_F  
6jpl\_D  
6jq0\_C  
6jq0\_E  
6jq8\_A  
6jqe\_B  
6jqh\_B  
6jqx\_A  
6jrq\_A  
6jrq\_C  
6jrq\_D  
6js9\_A  
6jsb\_B  
6jsc\_B  
6jsj\_A  
6jt1\_B  
6jt5\_A  
6jt6\_A  
6jtd\_A  
6jtt\_A  
6jtz\_A  
6ju7\_B  
6juh\_A  
6jv1\_A  
6jw8\_A  
6jxk\_F  
6jxn\_D  
6jy4\_L  
6jz5\_A  
6jz5\_B  
6jzy\_A  
6k02\_B  
6k0b\_G  
6k0k\_A  
6k0v\_A



6k0v\_A  
6k15\_H  
6k1f\_B  
6k1g\_D  
6k1h\_C  
6k1r\_A  
6k28\_A  
6k21\_A  
6k2m\_E  
6k37\_A  
6k3c\_B  
6k4c\_A  
6k4j\_A  
6k4r\_B  
6k61\_x  
6k73\_B  
6k7n\_A  
6k7y\_H  
6k7y\_P  
6k80\_A  
6k86\_B  
6k8d\_A  
6k8n\_A  
6k8p\_A  
6k8u\_A  
6k8w\_A  
6k96\_B  
6k9j\_A  
6kab\_A  
6kab\_C  
6kbe\_G  
6kby\_A  
6kcv\_B  
6kd5\_A  
6kdp\_A  
6kez\_F  
6kf4\_G  
6kf4\_P  
6kfn\_A  
6kfq\_A  
6kfs\_A  
6kfu\_A  
6kfw\_A  
6kg2\_A  
6kgy\_C  
6khj\_D  
6khx\_B  
6khx\_G  
6ki1\_B  
6kia\_A  
6kih\_C  
6kih\_F  
6kiy\_A  
6kji\_A

6kko\_A  
6kko\_C  
6klc\_A  
6kls\_D  
6klv\_F  
6kn8\_B  
6kn8\_D  
6kn8\_O  
6kni\_C  
6kpm\_A  
6kqx\_A  
6krt\_B  
6ks0\_A  
6ksr\_A  
6kth\_A  
6ktk\_C  
6ktx\_A  
6ku6\_B  
6kuf\_A  
6kwa\_A  
6kwf\_A  
6kwx\_A  
6kwy\_c  
6kxk\_D  
6ky4\_A  
6kyf\_A  
6kyg\_A  
6kz8\_A  
6l1b\_A  
6l11\_B  
6l1q\_B  
6l1u\_O  
6l2c\_A  
6l2c\_C  
6l2d\_A  
6l2f\_B  
6l2m\_A  
6l2z\_B  
6l3u\_B  
6l3u\_C  
6l3u\_F  
6l3w\_A  
6l42\_A  
6l47\_A  
6l4c\_B  
6l55\_A  
6l55\_J  
6l5m\_E  
6l69\_B  
6l6d\_A  
6l6w\_A  
6l7o\_A  
6l7o\_B  
6l7o\_F

6l7o\_P  
6l7p\_A  
6l7w\_A  
6l8a\_D  
6l8h\_D  
6l8k\_A  
6l8u\_C  
6lai\_B  
6lb7\_A  
6lb9\_A  
6lcp\_A  
6leb\_A  
6lf6\_A  
6lfo\_R  
6lgj\_C  
6lgy\_A  
6lh9\_A  
6li0\_A  
6li1\_A  
6li2\_A  
6li6\_A  
6li9\_B  
6lid\_C  
6lj3\_A  
6lj3\_B  
6ljj\_A  
6lke\_A  
6lkj\_A  
6lkn\_M  
6lkr\_B  
6ll9\_A  
6llx\_B  
6lm0\_C  
6ln2\_A  
6loj\_B  
6lp1\_C  
6lrb\_D  
6lrg\_B  
6lth\_L  
6lum\_E  
6lvb\_A  
6lx2\_A  
6lx9\_A  
6lxy\_B  
6lyh\_B  
6lz1\_A  
6lz7\_A  
6lzg\_A  
6lzt\_A  
6m0l\_A  
6m0a\_B  
6m0j\_A  
6m0r\_B  
6m0r\_H

6m0r\_O  
6m17\_A  
6m18\_D  
6m20\_D  
6m35\_H  
6m3x\_G  
6m3x\_U  
6m48\_A  
6m4f\_G  
6m89\_A  
6m8n\_A  
6m8r\_F  
6m8t\_A  
6m8v\_A  
6m97\_A  
6m9b\_A  
6m9m\_A  
6m9r\_A  
6mal\_A  
6mb6\_A  
6mb9\_C  
6mbg\_A  
6mbj\_A  
6mbn\_B  
6mcp\_C  
6mde\_A  
6mdv\_B  
6me8\_A  
6me9\_A  
6meb\_B  
6mfd\_A  
6mfe\_A  
6mfl\_A  
6mfl\_A  
6mfv\_C  
6mgc\_A  
6mgj\_F  
6mj2\_B  
6mkk\_A  
6mkw\_A  
6mlb\_D  
6mlw\_A  
6mn5\_D  
6mni\_A  
6mo5\_A  
6moi\_B  
6moi\_B  
6mp5\_B  
6mp9\_A  
6mpb\_B  
6mpf\_D  
6mps\_A  
6ms2\_A  
6ms4\_B

6mso\_B  
6mso\_D  
6mu0\_A  
6muk\_A  
6mur\_D  
6muu\_A  
6mvf\_C  
6mvs\_A  
6mw5\_A  
6mx5\_A  
6mxd\_D  
6mzb\_A  
6n04\_B  
6n0k\_A  
6n0v\_B  
6n1c\_A  
6n1f\_D  
6n1x\_A  
6n20\_B  
6n20\_D  
6n23\_A  
6n23\_C  
6n2b\_B  
6n2c\_A  
6n2m\_B  
6n2o\_C  
6n35\_M  
6n3d\_A  
6n3d\_A  
6n3r\_C  
6n54\_B  
6n63\_A  
6n6q\_A  
6n6q\_B  
6n7r\_B  
6n8b\_A  
6n8b\_A  
6n8e\_A  
6n91\_B  
6n94\_A  
6n96\_D  
6n9q\_P  
6nal\_A  
6nas\_N  
6naz\_A  
6nbe\_N  
6nbn\_A  
6nbq\_K  
6nci\_B  
6ncr\_B  
6ncs\_B  
6ncx\_C  
6ncy\_A  
6ndx\_D

6neg\_A  
6nes\_A  
6nf4\_A  
6nff\_A  
6ng3\_A  
6nh5\_D  
6nh7\_B  
6nhg\_E  
6nhx\_A  
6nil\_D  
6nin\_U  
6njc\_A  
6njd\_A  
6njd\_B  
6njw\_A  
6nki\_A  
6nkm\_F  
6nkq\_B  
6nl5\_C  
6nlk\_L  
6nlp\_B  
6nlq\_B  
6nma\_A  
6nmi\_B  
6nmn\_B  
6no7\_A  
6nok\_A  
6nor\_A  
6nor\_D  
6noz\_A  
6np3\_A  
6npd\_A  
6npo\_A  
6npy\_A  
6nr0\_A  
6nro\_A  
6nrz\_A  
6ns3\_A  
6ns4\_A  
6nt2\_C  
6nt7\_A  
6nt8\_A  
6ntb\_C  
6nu8\_A  
6nu9\_A  
6nud\_J  
6nul\_A  
6nvu\_A  
6nw7\_B  
6nw9\_A  
6ny6\_B  
6ny6\_D  
6ny8\_A  
6nz0\_Z

6nz0\_Z  
6nz4\_A  
6nzu\_A  
6o0g\_A  
6o2y\_B  
6o38\_B  
6o3v\_B  
6o49\_A  
6o4c\_C  
6o4k\_B  
6o4k\_C  
6o4k\_F  
6o58\_A  
6o5e\_A  
6o5y\_D  
6o61\_B  
6o6o\_A  
6o77\_D  
6o7e\_D  
6o9g\_D  
6o9m\_4  
6ob0\_A  
6ob2\_B  
6ob5\_D  
6obd\_A  
6obg\_C  
6oby\_B  
6oc6\_B  
6odd\_A  
6oe2\_A  
6oec\_L  
6oew\_B  
6oex\_A  
6of3\_B  
6ofs\_A  
6ofu\_B  
6ogn\_A  
6oh2\_A  
6oh7\_A  
6oh9\_A  
6ohb\_A  
6ohh\_B  
6ohk\_A  
6ohp\_A  
6ohp\_C  
6oi2\_A  
6oid\_B  
6oio\_A  
6oja\_B  
6oja\_F  
6ojt\_A  
6ok0\_D  
6ok1\_B  
6ok2\_D

6okk\_T  
6okv\_D  
6okz\_B  
6oln\_C  
6om5\_A  
6oms\_A  
6on3\_F  
6on4\_A  
6on5\_A  
6onq\_A  
6onx\_A  
6oo8\_A  
6op8\_A  
6oqa\_D  
6oqm\_A  
6or3\_A  
6org\_B  
6ori\_A  
6otf\_B  
6otj\_B  
6ott\_B  
6otu\_A  
6oty\_B  
6ous\_A  
6ouv\_A  
6ov6\_A  
6ow0\_A  
6ow4\_F  
6owj\_A  
6own\_B  
6owo\_M  
6ox4\_B  
6ox5\_A  
6oxd\_A  
6oyw\_C  
6oz7\_A  
6oz7\_C  
6oza\_A  
6ozr\_B  
6ozv\_A  
6p1z\_E  
6p1z\_H  
6p2a\_C  
6p2i\_A  
6p2t\_A  
6p3i\_A  
6p42\_A  
6p43\_C  
6p4v\_A  
6p4w\_A  
6p57\_A  
6p59\_B  
6p5r\_A  
6p5s\_A



6p6j\_A  
6p7o\_A  
6p81\_A  
6p8f\_C  
6p8l\_G  
6p8o\_A  
6p8p\_A  
6p8u\_A  
6p8u\_A  
6p8v\_C  
6p9u\_F  
6pa2\_A  
6pa3\_D  
6pai\_C  
6pak\_B  
6par\_B  
6pbc\_A  
6pbm\_A  
6pbm\_B  
6pcl\_A  
6pcc\_A  
6pda\_A  
6pdc\_A  
6pe3\_A  
6pej\_B  
6pfa\_C  
6pfy\_W  
6pgl\_A  
6pgn\_A  
6ph2\_C  
6ph4\_A  
6pi5\_D  
6pi9\_A  
6pii\_A  
6pk3\_B  
6pk6\_A  
6pki\_A  
6pl0\_B  
6pml\_B  
6pmp\_C  
6pmu\_B  
6pnj\_T  
6po4\_A  
6po4\_C  
6pol\_F  
6pop\_A  
6pp8\_F  
6ppj\_A  
6pq9\_A  
6pqb\_C  
6pqn\_A  
6pqz\_B  
6pr4\_A  
6prm\_D

6pro\_A  
6prx\_B  
6prz\_A  
6ps2\_A  
6ps3\_A  
6psd\_E  
6pso\_A  
6pt8\_A  
6pt9\_B  
6ptn\_2  
6ptn\_3  
6ptn\_5  
6pty\_A  
6puu\_D  
6pvg\_A  
6pvz\_B  
6pw3\_A  
6pw7\_B  
6pw8\_A  
6pwj\_A  
6pwq\_B  
6pxa\_I  
6pxa\_J  
6pxk\_A  
6pxk\_K  
6pxs\_A  
6py0\_C  
6pyz\_A  
6pza\_C  
6q05\_C  
6q21\_A  
6q2k\_A  
6q34\_B  
6q3x\_A  
6q56\_D  
6q67\_A  
6q72\_D  
6q7j\_B  
6q8n\_A  
6q9c\_A  
6qb8\_Q  
6qbt\_A  
6qbw\_A  
6qbw\_A  
6qci\_B  
6qcl\_B  
6qct\_A  
6qd7\_E  
6qe6\_A  
6qel\_I  
6qga\_E  
6qgb\_A  
6qgb\_E  
6qhd\_B

6qhe\_A  
6qhn\_D  
6qip\_B  
6qix\_A  
6qj6\_A  
6qja\_D  
6qjc\_D  
6qk7\_C  
6qmm\_B  
6qn6\_B  
6qp2\_B  
6qp4\_A  
6qp4\_A  
6qpa\_H  
6qpa\_P  
6qpa\_Q  
6qpk\_B  
6qps\_A  
6qqi\_A  
6qqm\_A  
6qrj\_A  
6qro\_B  
6qro\_D  
6qsi\_A  
6qsk\_E  
6qta\_A  
6qu0\_B  
6qu2\_A  
6qug\_C  
6qul\_b  
6qul\_b  
6qul\_f  
6quy\_G  
6quz\_D  
6qv5\_A  
6qvj\_S  
6qvv\_A  
6qwj\_R  
6qxn\_A  
6qyi\_B  
6qz2\_E  
6qz4\_A  
6r02\_C  
6r0s\_A  
6r0s\_B  
6r0w\_E  
6r12\_B  
6r16\_H  
6r1a\_A  
6r1b\_C  
6r1g\_B  
6r1l\_A  
6r1x\_C  
6r26\_A

6r3y\_A  
6r41\_A  
6r48\_B  
6r4l\_A  
6r4n\_E  
6r4p\_B  
6r52\_A  
6r5r\_A  
6r5u\_A  
6r62\_A  
6r6h\_E  
6r6m\_B  
6r6n\_A  
6r7p\_A  
6r81\_B  
6r88\_D  
6r8u\_D  
6ra9\_B  
6raf\_A  
6raj\_B  
6rak\_A  
6rb7\_A  
6rdk\_M  
6rdo\_M  
6rdx\_M  
6rec\_M  
6rez\_C  
6rf0\_C  
6rfa\_A  
6rfl\_B  
6rfl\_I  
6rfq\_J  
6rfq\_X  
6rfr\_4  
6rfr\_j  
6rfr\_M  
6rfr\_Z  
6rft\_A  
6rgs\_B  
6rgz\_D  
6rh8\_B  
6rhv\_H  
6ric\_J  
6riw\_A  
6rjm\_B  
6rjv\_B  
6rk9\_B  
6rkb\_B  
6rkh\_A  
6rkj\_A  
6rl5\_D  
6rl5\_G  
6rmd\_D  
6rmg\_B

6rmp\_A  
6rmr\_A  
6rmr\_A  
6roh\_A  
6rqa\_A  
6rqf\_D  
6rqf\_F  
6rqf\_J  
6rr3\_A  
6rr9\_A  
6rr9\_A  
6rre\_D  
6rre\_F  
6rsw\_B  
6rum\_A  
6rur\_B  
6rur\_H  
6rve\_A  
6rvm\_D  
6rw0\_A  
6rx0\_B  
6rxb\_C  
6ry0\_A  
6ryf\_A  
6rzb\_B  
6s0g\_B  
6s0k\_f  
6s0r\_B  
6s0t\_A  
6s0v\_B  
6s1g\_A  
6s20\_C  
6s21\_A  
6s2e\_A  
6s2p\_N  
6s3t\_B  
6s4b\_A  
6s4d\_A  
6s58\_C  
6s5b\_D  
6s5g\_D  
6s5n\_D  
6s5n\_E  
6s61\_O  
6s6b\_K  
6s6v\_C  
6s6v\_D  
6s6y\_D  
6s6y\_J  
6s6z\_B  
6s7o\_E  
6s7r\_N  
6s7t\_A  
6s83\_G

6s84\_E  
6s8f\_H  
6s8w\_D  
6s9o\_F  
6sac\_A  
6sag\_A  
6sau\_A  
6sc4\_D  
6scz\_A  
6sdu\_A  
6sdv\_A  
6sg8\_B  
6sgf\_A  
6sh3\_D  
6shj\_C  
6shj\_D  
6si6\_A  
6siu\_C  
6sj2\_B  
6sjd\_A  
6sl0\_A  
6sl1\_A  
6sl3\_A  
6sll\_B  
6smk\_D  
6smt\_B  
6smw\_D  
6smz\_C  
6sna\_A  
6sna\_B  
6sne\_L  
6sne\_P  
6snn\_A  
6so2\_A  
6sp2\_E  
6spi\_C  
6spk\_A  
6spr\_A  
6sps\_A  
6spv\_A  
6sq8\_B  
6sqg\_C  
6sqg\_E  
6sqi\_A  
6sqx\_B  
6srb\_B  
6srd\_A  
6srt\_A  
6ssd\_A  
6ssp\_B  
6ssy\_A  
6stu\_A  
6sty\_B  
6su3\_X

6su6\_A  
6suk\_A  
6sv1\_d  
6sv1\_M  
6sv5\_A  
6svo\_A  
6sw9\_R  
6swc\_F  
6swc\_W  
6swl\_A  
6sy7\_H  
6syu\_A  
6sz4\_A  
6sz9\_C  
6szw\_C  
6t0e\_B  
6t0f\_D  
6t15\_H  
6t2b\_B  
6t2t\_A  
6t3v\_A  
6t4c\_C  
6t4v\_C  
6t5h\_A  
6t5w\_A  
6t69\_A  
6t70\_A  
6t7k\_A  
6t8l\_A  
6t8m\_B  
6t9n\_D  
6t9o\_B  
6t9o\_D  
6tas\_H  
6tbb\_G  
6tbx\_C  
6tc6\_A  
6tcb\_B  
6td3\_H  
6td7\_A  
6tdg\_A  
6tdv\_E  
6tdv\_O  
6tdv\_P  
6tdv\_R  
6teh\_C  
6tej\_A  
6tek\_A  
6tfk\_A  
6tfq\_A  
6tg9\_C  
6tgk\_C  
6th0\_A  
6tht\_A

6tir\_A  
6tj6\_B  
6tj7\_A  
6tjv\_P  
6tk0\_X  
6tl0\_B  
6tl4\_A  
6tl5\_A  
6tl7\_A  
6tld\_C  
6tmf\_Q  
6tmw\_B  
6tmx\_E  
6tmx\_M  
6tnh\_A  
6tnh\_B  
6tnh\_B  
6tnm\_A  
6tnn\_I  
6tnn\_p  
6toe\_B  
6tou\_G  
6tp9\_G  
6tpq\_q  
6tpv\_B  
6tq5\_A  
6tqf\_B  
6tqm\_B  
6tr8\_A  
6trk\_B  
6trq\_C  
6tsh\_D  
6tsk\_D  
6tt1\_A  
6tt1\_B  
6ttl\_B  
6ttn\_A  
6tuk\_B  
6tv9\_H  
6twi\_E  
6twi\_E  
6twm\_D  
6twm\_D  
6twm\_E  
6tx8\_A  
6ty4\_B  
6tzk\_A  
6tzu\_B  
6tzw\_A  
6tzz\_A  
6u08\_A  
6u0p\_C  
6u19\_B  
6ulh\_D



6u1q\_A  
6u1v\_A  
6u1v\_B  
6u1z\_B  
6u2a\_A  
6u2f\_A  
6u33\_A  
6u3b\_B  
6u3e\_A  
6u3g\_A  
6u3u\_A  
6u45\_A  
6u5i\_A  
6u5t\_A  
6u5v\_B  
6u6c\_E  
6u73\_A  
6u78\_A  
6u7b\_A  
6u7c\_A  
6u7g\_A  
6u83\_A  
6u87\_A  
6u8y\_J  
6u96\_D  
6u97\_A  
6u9d\_G  
6u9d\_R  
6u9d\_T  
6u9j\_B  
6u9k\_B  
6u9n\_A  
6uak\_A  
6uau\_A  
6uaz\_B  
6ubn\_B  
6ubn\_B  
6ubt\_E  
6ucm\_C  
6ucm\_C  
6ucy\_B  
6ud4\_F  
6ued\_A  
6ued\_A  
6ueg\_B  
6ueh\_A  
6uek\_A  
6ufo\_A  
6uh2\_B  
6uh7\_A  
6uhh\_B  
6uhx\_B  
6ui4\_A  
6ui5\_B

6uj5\_A  
6ukl\_E  
6uks\_B  
6ulu\_B  
6umr\_A  
6umt\_A  
6un3\_A  
6un8\_B  
6uog\_D  
6upc\_A  
6upd\_B  
6uq9\_B  
6uqf\_B  
6uqk\_A  
6uqk\_B  
6uqm\_A  
6uqq\_C  
6ur8\_B  
6usm\_B  
6uss\_B  
6uss\_B  
6ust\_C  
6ut5\_D  
6ut6\_A  
6ut6\_B  
6ut6\_D  
6uts\_A  
6uuw\_D  
6uv0\_A  
6uv6\_C  
6uvb\_A  
6uwd\_A  
6uwy\_B  
6ux4\_F  
6uyh\_B  
6uyk\_C  
6v04\_A  
6v1r\_A  
6v26\_D  
6v2h\_E  
6v2h\_E  
6v2t\_B  
6v2v\_A  
6v30\_B  
6v35\_C  
6v35\_D  
6v35\_F  
6v3f\_A  
6v3t\_D  
6v3t\_G  
6v43\_A  
6v4k\_H  
6v4n\_W  
6v4s\_E

6v55\_A  
6v63\_A  
6v6f\_A  
6v6h\_A  
6v77\_B  
6v7z\_B  
6v81\_A  
6v8p\_A  
6v8q\_A  
6v9s\_A  
6v9w\_A  
6v9w\_B  
6vby\_A  
6vcd\_B  
6vcf\_A  
6vd9\_C  
6vda\_A  
6vdc\_A  
6vdy\_A  
6vfy\_F  
6vg0\_B  
6vgc\_D  
6vgt\_A  
6vh5\_D  
6vhf\_A  
6vi3\_E  
6vig\_D  
6vii\_B  
6vim\_C  
6vim\_H  
6vji\_A  
6vlt\_D  
6vly\_A  
6vm0\_A  
6vm2\_B  
6vm5\_A  
6vmv\_A  
6vmw\_B  
6vny\_A  
6vo5\_A  
6vog\_E  
6voj\_A  
6voq\_A  
6vp8\_A  
6vpb\_B  
6vrg\_A  
6vri\_D  
6vsd\_A  
6vsp\_B  
6vtj\_A  
6vtv\_A  
6vtv\_B  
6vu8\_A  
6vu9\_A

6vuy\_A  
6vv8\_B  
6vvd\_B  
6vvo\_A  
6vvo\_B  
6vvo\_E  
6vvq\_C  
6vw8\_C  
6vww\_A  
6vx6\_E  
6vx7\_C  
6vyo\_B  
6vz0\_A  
6vz6\_A  
6vz8\_O  
6w04\_A  
6w0s\_A  
6w0s\_B  
6w1h\_A  
6w1i\_B  
6w1k\_A  
6w1k\_C  
6w25\_A  
6w2l\_A  
6w2q\_A  
6w2x\_A  
6w32\_B  
6w3v\_B  
6w4e\_B  
6w4x\_C  
6w5v\_D  
6w6d\_A  
6w6y\_A  
6w6z\_A  
6w80\_A  
6wa8\_A  
6wb6\_B  
6wcd\_A  
6wct\_D  
6weg\_A  
6wek\_B  
6wf7\_A  
6wfk\_C  
6wgm\_A  
6whd\_B  
6wj2\_G  
6wj6\_X  
6wjJ\_J  
6wjp\_A  
6wju\_A  
6wlc\_A  
6wm2\_0  
6wm2\_R  
6wm4\_A

6wmv\_C  
6wn0\_B  
6wn6\_A  
6wn6\_C  
6wn6\_C  
6wn9\_A  
6wng\_A  
6wo2\_A  
6wp5\_C  
6wpu\_A  
6wq3\_A  
6wql\_A  
6wqp\_B  
6wrf\_C  
6wrz\_A  
6wsg\_E  
6wt7\_A  
6wuk\_A  
6wv8\_A  
6wx6\_B  
6wxp\_A  
6wy9\_A  
6wyi\_A  
6wyy\_D  
6x0q\_L  
6x1g\_C  
6x3x\_A  
6x40\_A  
6x5r\_A  
6x5u\_D  
6x71\_A  
6x8z\_A  
6x91\_B  
6x91\_H  
6x99\_A  
6x9a\_B  
6xby\_A  
6xig\_B  
6xji\_C  
6xk2\_A  
6x11\_A  
6xmt\_A  
6xn0\_B  
6xpv\_B  
6xqn\_B  
6xr5\_D  
6xrk\_A  
6xs3\_A  
6xtv\_B  
6xty\_2  
6xty\_4  
6xty\_5  
6xty\_6  
6xty\_6

6xu2\_A  
6xv4\_A  
6xvg\_B  
6xw7\_B  
6xwq\_B  
6xxj\_A  
6xyd\_A  
6xz8\_B  
6y04\_B  
6y2z\_A  
6y3z\_P  
6y41\_B  
6y41\_C  
6y43\_A  
6y4e\_A  
6y5a\_A  
6y5y\_I  
6y79\_2  
6y79\_5  
6y8j\_A  
6y9t\_A  
6ya6\_A  
6ya7\_B  
6yb8\_B  
6y bq\_D  
6ybw\_L  
6ycl\_C  
6yca\_A  
6ydc\_D  
6yes\_A  
6ygc\_A  
6ygd\_A  
6ygf\_A  
6ygg\_A  
6ygl\_A  
6yhv\_B  
6yj1\_A  
6yj4\_a  
6yj4\_b  
6yj4\_D  
6yj4\_R  
6ylq\_A  
6y my\_b  
6ynv\_e  
6y oa\_B  
6yp7\_W  
6yp7\_x  
6yt3\_B  
6yu6\_B  
6yua\_A  
6yub\_A  
6yub\_B  
6yug\_B  
6yus\_A

6yva\_C  
6yw2\_A  
6yw3\_A  
6yw7\_A  
6ywk\_C  
6ywp\_A  
6yxa\_A  
6yxs\_A  
6yyi\_B  
6yzm\_A  
6yzs\_A  
6z0v\_S  
6z0v\_S  
6z1f\_1  
6z1f\_3  
6z2k\_F  
6z2p\_A  
6z3b\_A  
6z3r\_A  
6z4w\_A  
6z4x\_E  
6z5a\_A  
6z69\_B  
6z80\_F  
6z96\_A  
6z96\_B  
6z9i\_B  
6z9k\_B  
6za7\_A  
6za9\_N  
6zaz\_A  
6zaz\_B  
6zb6\_D  
6zcv\_A  
6zdc\_A  
6ze9\_A  
6zgz\_E  
6zhk\_A  
6zi9\_L  
6zje\_A  
6zk9\_2  
6zke\_4  
6zkf\_W  
6zkh\_s  
6zkk\_6  
6zkk\_x  
6zkl\_i  
6zkl\_Y  
6zkm\_4  
6zkn\_6  
6zko\_o  
6zkr\_z  
6zks\_b  
6zkv\_N

6zkv\_s  
6zld\_B  
6zll\_A  
6zlw\_c  
6zlz\_B  
6znl\_C  
6znn\_J  
6zns\_A  
6zns\_A  
6zpj\_T  
6zok\_L  
6zol\_d  
6zol\_F  
6zpm\_B  
6zqm\_b  
6zqm\_E  
6zsq\_O  
6zsq\_P  
6zu8\_A  
6zvh\_a  
6zvh\_a  
6zvh\_G  
6zvh\_O  
6zwm\_B  
6zwo\_F  
6zxc\_U  
6zy3\_H  
6zy9\_G  
6zyd\_A  
6zyk\_A  
6zyp\_A  
6zys\_C  
6zys\_D  
6zys\_F  
7a17\_A  
7a1g\_B  
7a1g\_S  
7a23\_B  
7a23\_H  
7a23\_J  
7a23\_P  
7a23\_T  
7a24\_i  
7a41\_A  
7a5q\_B  
7a5x\_A  
7a62\_B  
7a62\_C  
7a6u\_B  
7a76\_B  
7aat\_A  
7aba\_A  
7acd\_B  
7adr\_E



7agi\_A  
7agm\_A  
7ahd\_D  
7ahh\_A  
7an4\_A  
7anc\_A  
7anw\_D  
7aoa\_A  
7awo\_B  
7ax6\_A  
7b08\_A  
7b16\_D  
7b1g\_A  
7bor\_C  
7bp1\_A  
7bpc\_A  
7bpc\_C  
7bqo\_A  
7bqu\_A  
7brn\_A  
7bs7\_A  
7bss\_C  
7bsw\_A  
7bt2\_A  
7btc\_B  
7bv5\_A  
7bv5\_D  
7bva\_A  
7bvd\_B  
7bvf\_A  
7bvj\_A  
7bvy\_A  
7bwh\_A  
7bwl\_A  
7bwr\_A  
7by6\_B  
7byw\_A  
7byx\_D  
7c1s\_A  
7c1y\_A  
7c23\_B  
7c2b\_C  
7c3f\_S  
7c3i\_A  
7c4h\_A  
7c79\_A  
7c7a\_K  
7c7d\_B  
7c9r\_H  
7c9z\_D  
7ca3\_B  
7cbb\_A  
7cbi\_A  
7cbk\_D

7cbs\_A  
7cfn\_R  
7cgn\_E  
7cgp\_C  
7cgq\_C  
7cgy\_A  
7cib\_A  
7cjd\_C  
7cka\_A  
7cm1\_B  
7cmq\_B  
7cn3\_C  
7cn6\_B  
7cn6\_B  
7cog\_D  
7cq5\_C  
7cqw\_A  
7ct4\_C  
7cu1\_A  
7cv0\_A  
7cvn\_B  
7cy5\_A  
7cz5\_R  
7cza\_B  
7d62\_A  
7d7q\_B  
7d8u\_A  
7dh6\_B  
7dh6\_B  
7jh4\_C  
7jhi\_B  
7jid\_B  
7jji\_A  
7job\_A  
7js3\_C  
7juq\_C  
7jur\_C  
7juv\_C  
7jux\_A  
7jwf\_A  
7k0r\_B  
7k26\_A  
7k26\_C  
7k26\_J  
7k4f\_A  
7kb7\_A  
7kcp\_A  
7kh2\_D  
7khs\_D  
7kjr\_A  
7ksl\_B  
7ksm\_C  
7kz7\_A  
7l2a\_A

713o\_D  
713q\_B  
8gss\_C  
8rnt\_A  
8xim\_A  
8xim\_B  
9rnt\_A
